# Supplementary material
Source: Royal Society of Chemistry journal article supplement (doi:10.1039/d6dt00402d)
Supplement: d6dt00402d1.pdf [file d6dt00402d1.pdf]

## Supplementary Information

# Molecular mechanisms behind potential genotoxicity of metal oxide nanoparticles: nucleoside deglycosylation pathway

Fredric G. Svensson, Björn H. Greijer, Timothe Guerin, Tatiana Agback, Peter Agback, and Vadim G. Kessler\*

*Department of Molecular Sciences, Swedish University of Agricultural Sciences, Uppsala, Sweden*

*\*Correspondence: [vadim.kessler@slu.se](mailto:vadim.kessler@slu.se)*

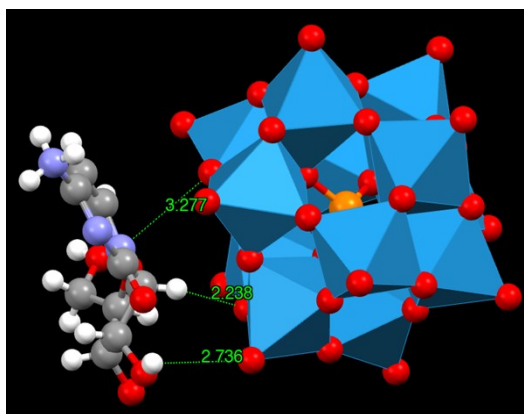

Supplementary Figure S1. Selected short contacts in compound **1**. N3C-O31 3.277 Å (terminal O), (C5C)H5CB-O32 2.238 Å (bridging O), (O2C)H2CB-O19 2.736 Å, (terminal O).

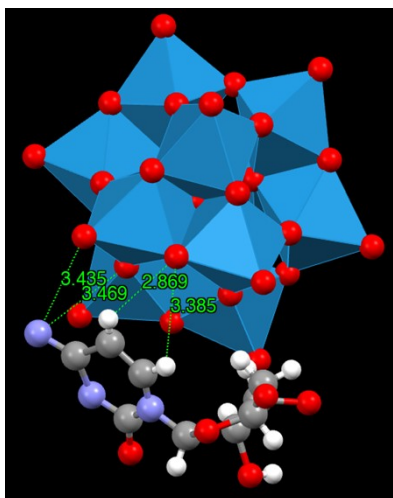

Supplementary Figure S2. Selected short contacts in compound **2**. N202-O35 3.435 Å (terminal O), N202-O48 3.469 Å (bridging O), (C209)H209-O21 2.869 Å (bridging O), (C208)H208-O21 3.385 Å (bridging O).

## Supplementary Information

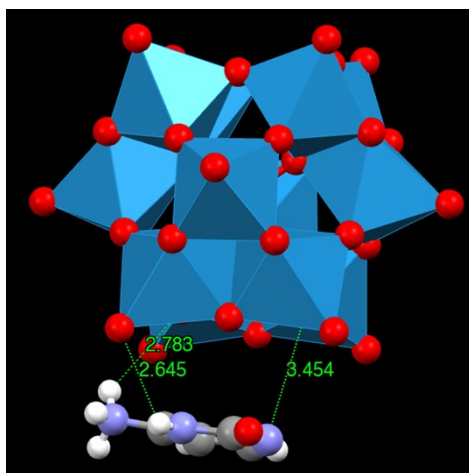

Supplementary Figure S3. Selected short contacts in compound **3**. (N1)H1B-O14 2.783 Å (bridging O), (N3)H3A-O1 2.645 Å (terminal O), N2-O9 3.454 Å (bridging O).

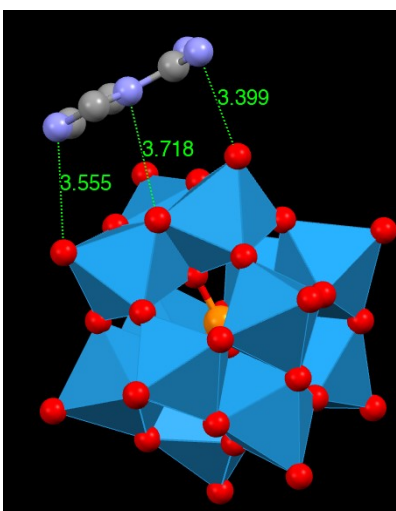

Supplementary Figure S4. Selected short contacts in compound **4**. N1A-O016 3.555 Å (terminal O), N2A-O00V 3.718 Å (bridging O), N3A-O01F 3.399 Å (terminal O). Hydrogen omitted due to the heavy disorder in the cytosine molecule.

## Supplementary Information

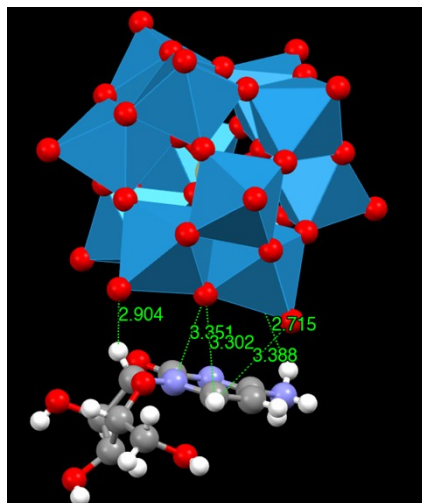

Supplementary Figure S5. Selected short contacts in compound **5**. (CF<sub>5</sub>)H<sub>5</sub>FA-O15A 2.904 Å (terminal O), N1F-O21A 3.351 Å (bridging O), (C<sub>4</sub>F)H<sub>4</sub>F<sub>4</sub>-O21A 3.302 Å (bridging O), (C<sub>4</sub>F)H<sub>4</sub>F<sub>4</sub>-O36A 3.388 Å (terminal O), N3F-H3F3-O22A 2.715 Å (terminal O).

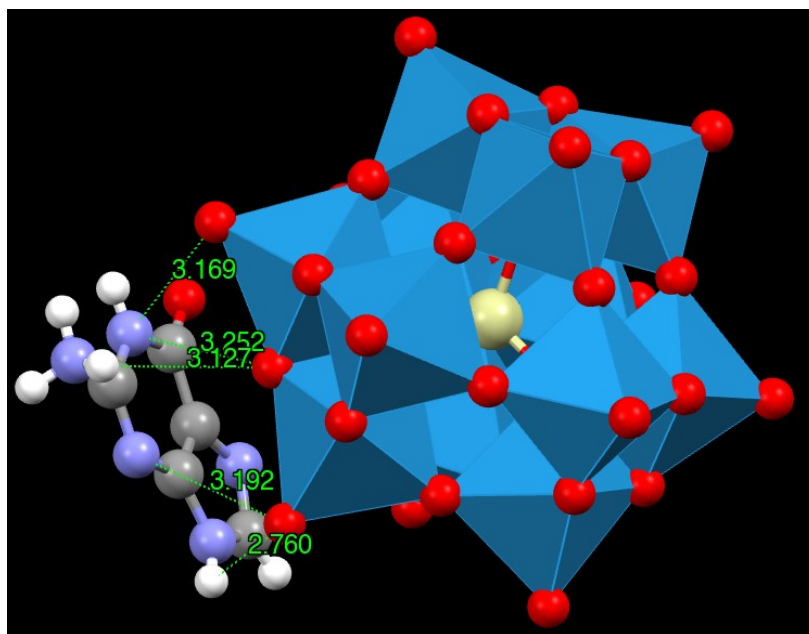

Supplementary Figure S6. Selected short contacts in compound **6**. N12-O38 3.169 Å (terminal O), N12-O22 3.252 Å (bridge O), N13-O2 3.192 Å (terminal O), (N<sub>14</sub>)H<sub>14</sub>A-O2 2.760 Å (terminal O), (N<sub>11</sub>)H<sub>11</sub>C-O22 3.127 Å (bridge O).

## Supplementary Information

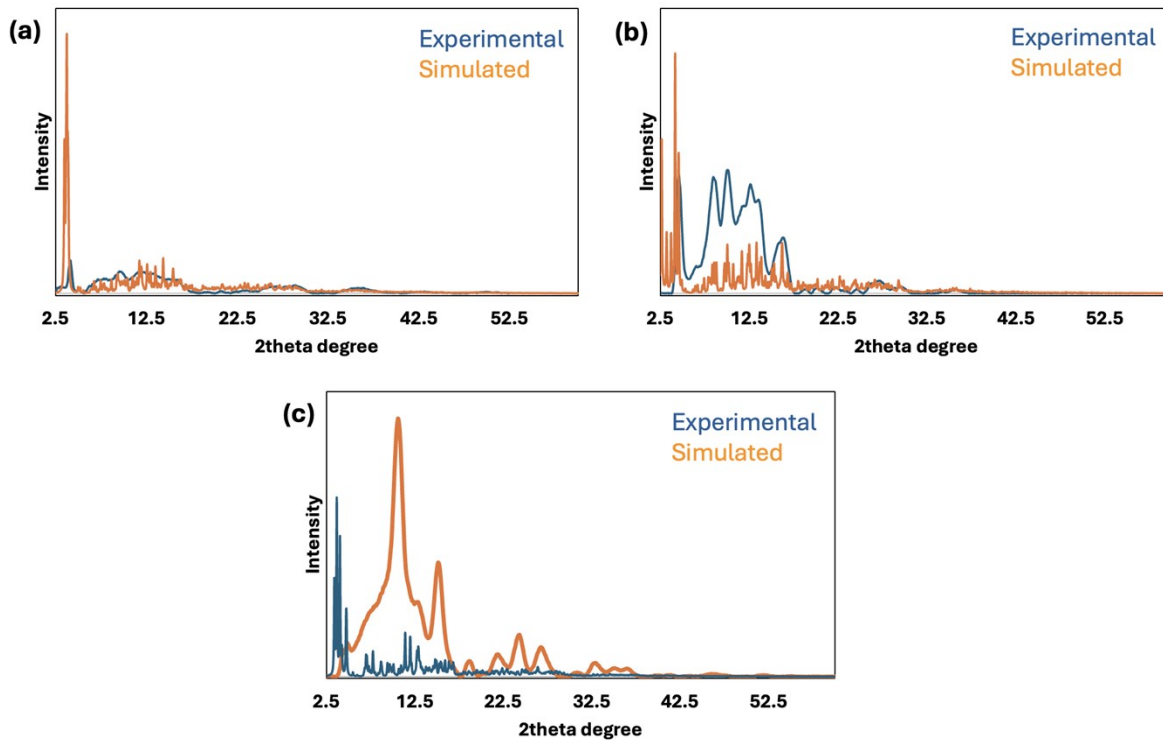

Supplementary Figure S7. Experimental and simulated powder XRD patterns for (a) compound 6, (b) compound 2, and (c) compound 4.

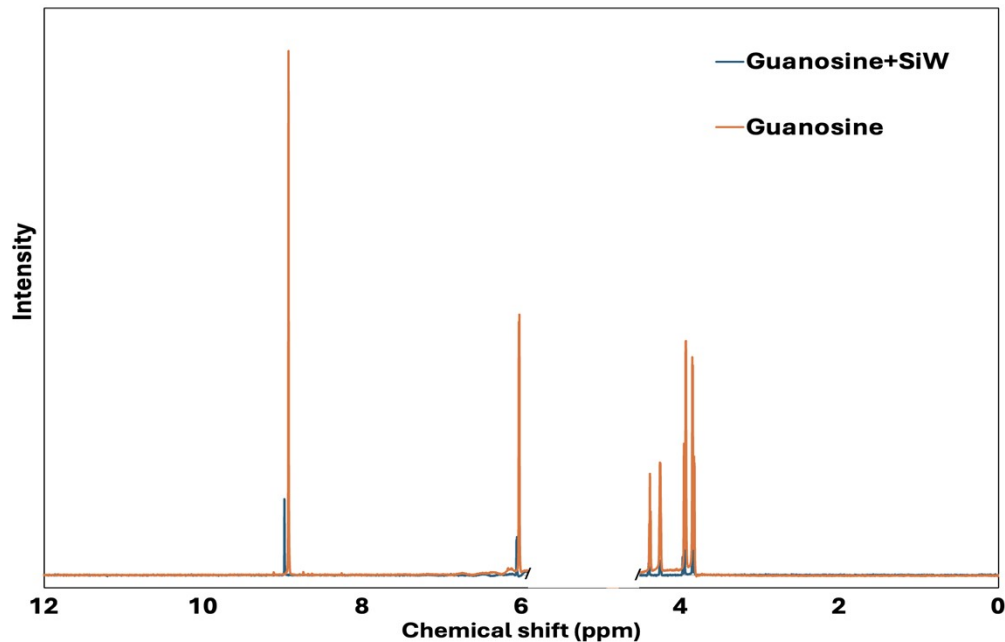

Supplementary Figure S8. <sup>1</sup>H NMR spectrum of guanosine and guanosine with silicotungstic acid (1:1). The water signal (4.5 – 6 ppm) has been omitted for clarity.

## Supplementary Information

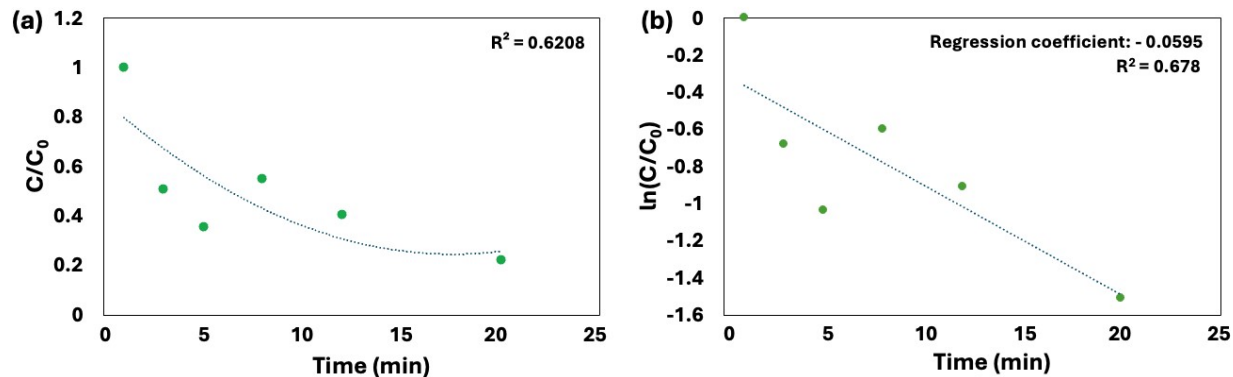

Supplementary Figure S9. Kinetic plots of the deglycosylation of guanosine by phosphotungstate, (a)  $C/C_0$  plot and (b) first-order plot.

Table S1. Atomic coordinates and equivalent isotropic atomic displacement parameters ( $\text{\AA}^2$ ) for compound **1**.

| x/a | y/b        | z/c        | U(eq)       |             |
|-----|------------|------------|-------------|-------------|
| W1  | 0.98295(5) | 0.03380(5) | 0.65686(3)  | 0.02029(16) |
| W2  | 0.54974(5) | 0.96860(5) | 0.60467(3)  | 0.02030(16) |
| W3  | 0.73354(6) | 0.15848(5) | 0.49419(2)  | 0.02062(16) |
| W4  | 0.74638(6) | 0.93632(5) | 0.53358(3)  | 0.02128(16) |
| W5  | 0.53463(5) | 0.18987(5) | 0.56309(3)  | 0.02051(16) |
| W6  | 0.76743(6) | 0.06730(5) | 0.73169(3)  | 0.02186(16) |
| W7  | 0.76699(6) | 0.89204(5) | 0.64767(3)  | 0.02215(16) |
| W8  | 0.96623(5) | 0.07303(5) | 0.54184(3)  | 0.01916(15) |
| W9  | 0.97161(6) | 0.23742(5) | 0.61659(3)  | 0.02055(16) |
| W10 | 0.55510(5) | 0.14718(5) | 0.68638(3)  | 0.02135(16) |
| W11 | 0.73482(6) | 0.32009(5) | 0.57203(3)  | 0.02192(16) |
| W12 | 0.76168(6) | 0.27183(5) | 0.69461(3)  | 0.02200(16) |
| P1  | 0.7566(3)  | 0.1072(2)  | 0.61197(14) | 0.0089(7)   |
| O39 | 0.0559(10) | 0.3152(10) | 0.6232(5)   | 0.031(3)    |
| O1  | 0.0484(10) | 0.0488(8)  | 0.5001(5)   | 0.023(3)    |

## Supplementary Information

|     |            |            |           |          |
|-----|------------|------------|-----------|----------|
| O2  | 0.7350(11) | 0.1639(9)  | 0.4364(4) | 0.028(3) |
| O3  | 0.7881(10) | 0.1887(9)  | 0.7389(5) | 0.027(3) |
| O4  | 0.0154(10) | 0.1782(10) | 0.5644(5) | 0.030(3) |
| O5  | 0.7858(13) | 0.7964(10) | 0.6732(6) | 0.038(4) |
| O6  | 0.7875(10) | 0.0315(11) | 0.7852(5) | 0.031(3) |
| O7  | 0.5968(10) | 0.3003(9)  | 0.5656(5) | 0.026(3) |
| O8  | 0.5266(10) | 0.0716(9)  | 0.5707(4) | 0.023(3) |
| O9  | 0.7122(9)  | 0.0385(9)  | 0.5048(4) | 0.021(3) |
| O10 | 0.7482(10) | 0.2724(10) | 0.5118(5) | 0.032(3) |
| O11 | 0.0307(10) | 0.1508(9)  | 0.6527(5) | 0.024(3) |
| O12 | 0.7437(10) | 0.9667(8)  | 0.6985(4) | 0.021(3) |
| O13 | 0.0763(11) | 0.9869(10) | 0.6875(5) | 0.030(3) |
| O14 | 0.7572(11) | 0.8694(9)  | 0.4888(5) | 0.027(3) |
| O15 | 0.8707(10) | 0.2883(9)  | 0.5819(5) | 0.025(3) |
| O16 | 0.4160(10) | 0.2155(11) | 0.5511(5) | 0.034(4) |
| O17 | 0.0267(10) | 0.0207(8)  | 0.5940(4) | 0.021(3) |
| O18 | 0.7227(10) | 0.3141(11) | 0.6364(5) | 0.031(3) |
| O19 | 0.4425(11) | 0.1578(12) | 0.7116(5) | 0.037(4) |
| O20 | 0.5314(10) | 0.1932(10) | 0.6285(4) | 0.026(3) |
| O21 | 0.8685(9)  | 0.1101(8)  | 0.6082(4) | 0.019(3) |
| O22 | 0.7237(9)  | 0.1356(8)  | 0.6595(4) | 0.018(3) |
| O23 | 0.8755(9)  | 0.9797(9)  | 0.5380(5) | 0.024(3) |
| O24 | 0.7425(12) | 0.4237(9)  | 0.5612(5) | 0.033(3) |
| O25 | 0.6114(9)  | 0.9230(10) | 0.5507(5) | 0.026(3) |
| O26 | 0.5421(10) | 0.0398(9)  | 0.6574(4) | 0.025(3) |
| O27 | 0.8937(10) | 0.9408(10) | 0.6459(5) | 0.028(3) |
| O28 | 0.8960(10) | 0.0646(9)  | 0.7051(4) | 0.021(3) |

## Supplementary Information

|     |            |            |           |          |
|-----|------------|------------|-----------|----------|
| O29 | 0.6242(10) | 0.2468(10) | 0.7043(5) | 0.027(3) |
| O30 | 0.7800(11) | 0.3580(11) | 0.7260(5) | 0.034(4) |
| O31 | 0.6266(9)  | 0.8898(9)  | 0.6395(4) | 0.022(3) |
| O32 | 0.6309(9)  | 0.0904(9)  | 0.7337(4) | 0.022(3) |
| O33 | 0.7777(10) | 0.8645(9)  | 0.5850(5) | 0.027(3) |
| O34 | 0.8674(9)  | 0.1353(10) | 0.5106(5) | 0.026(3) |
| O35 | 0.7110(9)  | 0.1672(9)  | 0.5766(4) | 0.020(3) |
| O36 | 0.5947(10) | 0.1740(9)  | 0.5053(5) | 0.024(3) |
| O37 | 0.4379(10) | 0.9194(10) | 0.6043(5) | 0.030(3) |
| O38 | 0.7207(9)  | 0.0158(9)  | 0.6027(5) | 0.022(3) |
| O40 | 0.8889(9)  | 0.2558(9)  | 0.6679(5) | 0.022(3) |
| N2B | 0.7395(12) | 0.5171(12) | 0.3743(5) | 0.026(4) |
| O1A | 0.7807(12) | 0.6343(11) | 0.7703(6) | 0.040(4) |
| O5C | 0.7435(15) | 0.8348(14) | 0.8422(6) | 0.060(6) |
| O1B | 0.6854(12) | 0.6511(10) | 0.3713(5) | 0.032(3) |
| O1C | 0.3437(13) | 0.9467(12) | 0.7072(6) | 0.043(4) |
| N3A | 0.9159(14) | 0.6554(12) | 0.7275(6) | 0.030(4) |
| O4C | 0.5968(15) | 0.8889(15) | 0.7774(7) | 0.059(6) |
| N3B | 0.7060(13) | 0.5931(11) | 0.4415(6) | 0.027(4) |
| O4A | 0.9920(13) | 0.5470(11) | 0.6860(6) | 0.041(4) |
| N3C | 0.4749(17) | 0.8577(13) | 0.7250(6) | 0.039(5) |
| O3B | 0.4445(12) | 0.7236(13) | 0.5213(7) | 0.052(5) |
| N2C | 0.3428(16) | 0.8083(14) | 0.6814(8) | 0.044(5) |
| O2A | 0.7799(17) | 0.5071(12) | 0.6535(6) | 0.056(5) |
| C1A | 0.8456(17) | 0.6800(14) | 0.7584(7) | 0.029(5) |
| C2B | 0.7628(15) | 0.4463(16) | 0.3977(8) | 0.036(5) |
| N1B | 0.7865(15) | 0.3816(13) | 0.3740(8) | 0.042(5) |

## Supplementary Information

|     |            |            |            |          |
|-----|------------|------------|------------|----------|
| O3C | 0.5190(19) | 0.0328(14) | 0.8584(8)  | 0.070(7) |
| C4B | 0.7340(16) | 0.5229(14) | 0.4660(8)  | 0.032(5) |
| N2A | 0.8580(14) | 0.7629(12) | 0.7745(7)  | 0.033(4) |
| O2B | 0.5393(16) | 0.7657(15) | 0.4443(7)  | 0.066(6) |
| O4B | 0.6970(13) | 0.6698(12) | 0.5082(6)  | 0.046(5) |
| C6B | 0.5564(16) | 0.6836(15) | 0.4595(8)  | 0.033(5) |
| C8B | 0.6180(18) | 0.7014(15) | 0.5338(8)  | 0.035(5) |
| C3B | 0.7631(15) | 0.4519(13) | 0.4450(7)  | 0.027(4) |
| O5A | 0.1212(15) | 0.6470(14) | 0.6277(7)  | 0.057(6) |
| C7A | 0.904(2)   | 0.6027(14) | 0.6238(7)  | 0.035(5) |
| O5B | 0.626(2)   | 0.5868(15) | 0.5885(8)  | 0.077(8) |
| C4C | 0.5250(19) | 0.7818(13) | 0.7163(8)  | 0.036(5) |
| C3C | 0.4835(18) | 0.7205(14) | 0.6913(8)  | 0.037(5) |
| C4A | 0.9932(17) | 0.709(2)   | 0.7144(9)  | 0.050(8) |
| C8A | 0.990(2)   | 0.5436(15) | 0.6363(8)  | 0.038(6) |
| O3A | 0.8645(17) | 0.5853(17) | 0.5803(7)  | 0.067(7) |
| C1C | 0.3861(19) | 0.8782(19) | 0.7055(8)  | 0.042(6) |
| C2A | 0.9279(19) | 0.8181(18) | 0.7622(9)  | 0.044(7) |
| C5C | 0.5137(19) | 0.9263(18) | 0.7551(7)  | 0.042(6) |
| O2C | 0.3964(16) | 0.0304(15) | 0.7896(8)  | 0.067(6) |
| C1B | 0.7066(15) | 0.5913(17) | 0.3937(7)  | 0.035(6) |
| C5A | 0.9005(18) | 0.5723(14) | 0.7034(8)  | 0.033(5) |
| C2C | 0.387(2)   | 0.7319(16) | 0.6763(9)  | 0.042(6) |
| N1A | 0.929(2)   | 0.8920(15) | 0.7800(8)  | 0.062(8) |
| C7C | 0.5040(18) | 0.9561(19) | 0.8375(9)  | 0.044(6) |
| C6C | 0.4451(19) | 0.9510(17) | 0.7956(9)  | 0.045(6) |
| C9A | 0.094(2)   | 0.561(2)   | 0.6171(10) | 0.058(8) |

## Supplementary Information

|     |            |            |            |           |
|-----|------------|------------|------------|-----------|
| C8C | 0.606(2)   | 0.9186(18) | 0.8237(9)  | 0.043(6)  |
| C6A | 0.8317(19) | 0.5856(18) | 0.6634(8)  | 0.044(6)  |
| N1C | 0.3374(18) | 0.6727(18) | 0.6535(8)  | 0.060(7)  |
| C3A | 0.002(2)   | 0.7853(18) | 0.7311(9)  | 0.048(7)  |
| C9C | 0.644(2)   | 0.852(3)   | 0.8533(11) | 0.077(12) |
| C9B | 0.636(2)   | 0.6758(17) | 0.5839(8)  | 0.048(7)  |
| C7B | 0.5241(18) | 0.6752(17) | 0.5095(9)  | 0.042(6)  |
| C5B | 0.6705(19) | 0.6722(18) | 0.4617(8)  | 0.043(6)  |

---

Table S2. Bond lengths (Å) for compound 1.

---

|        |           |        |           |
|--------|-----------|--------|-----------|
| W1-O13 | 1.718(14) | W1-O28 | 1.901(13) |
| W1-O27 | 1.928(15) | W1-O17 | 1.944(13) |
| W1-O11 | 1.960(14) | W1-O21 | 2.424(13) |
| W2-O37 | 1.702(14) | W2-O26 | 1.911(13) |
| W2-O31 | 1.915(13) | W2-O25 | 1.925(14) |
| W2-O8  | 1.931(13) | W2-O38 | 2.432(12) |
| W3-O2  | 1.694(13) | W3-O10 | 1.881(16) |
| W3-O34 | 1.910(13) | W3-O36 | 1.923(14) |
| W3-O9  | 1.940(14) | W3-O35 | 2.434(12) |
| W4-O14 | 1.690(13) | W4-O9  | 1.877(14) |
| W4-O23 | 1.882(13) | W4-O25 | 1.907(13) |
| W4-O33 | 1.931(14) | W4-O38 | 2.406(13) |
| W5-O16 | 1.693(13) | W5-O8  | 1.881(13) |
| W5-O36 | 1.894(14) | W5-O20 | 1.915(13) |
| W5-O7  | 1.936(15) | W5-O35 | 2.447(12) |
| W6-O6  | 1.687(14) | W6-O12 | 1.888(13) |
| W6-O32 | 1.886(13) | W6-O28 | 1.908(13) |

## Supplementary Information

|         |           |         |           |
|---------|-----------|---------|-----------|
| W6-O3   | 1.946(15) | W6-O22  | 2.446(12) |
| W7-O5   | 1.702(15) | W7-O27  | 1.881(14) |
| W7-O33  | 1.890(15) | W7-O31  | 1.916(12) |
| W7-O12  | 1.924(13) | W7-O38  | 2.436(14) |
| W8-O1   | 1.695(13) | W8-O34  | 1.896(14) |
| W8-O4   | 1.906(16) | W8-O23  | 1.922(14) |
| W8-O17  | 1.920(13) | W8-O21  | 2.423(13) |
| W9-O39  | 1.687(15) | W9-O15  | 1.882(14) |
| W9-O4   | 1.886(16) | W9-O40  | 1.896(13) |
| W9-O11  | 1.904(13) | W9-O21  | 2.458(12) |
| W10-O19 | 1.702(14) | W10-O20 | 1.872(14) |
| W10-O26 | 1.903(14) | W10-O29 | 1.904(15) |
| W10-O32 | 1.943(13) | W10-O22 | 2.422(12) |
| W11-O24 | 1.669(14) | W11-O18 | 1.893(14) |
| W11-O7  | 1.905(14) | W11-O15 | 1.929(14) |
| W11-O10 | 1.925(16) | W11-O35 | 2.437(14) |
| W12-O30 | 1.659(16) | W12-O3  | 1.878(14) |
| W12-O18 | 1.905(15) | W12-O40 | 1.909(13) |
| W12-O29 | 1.924(14) | W12-O22 | 2.437(13) |
| P1-O21  | 1.521(13) | P1-O22  | 1.527(12) |
| P1-O35  | 1.533(13) | P1-O38  | 1.545(14) |
| N2B-C2B | 1.35(3)   | N2B-C1B | 1.37(3)   |
| O1A-C1A | 1.19(3)   | O5C-C9C | 1.42(3)   |
| O1B-C1B | 1.18(3)   | O1C-C1C | 1.22(3)   |
| N3A-C1A | 1.37(3)   | N3A-C4A | 1.39(3)   |
| N3A-C5A | 1.50(3)   | O4C-C5C | 1.43(3)   |
| O4C-C8C | 1.44(3)   | N3B-C4B | 1.37(3)   |

## Supplementary Information

|         |         |         |         |
|---------|---------|---------|---------|
| N3B-C1B | 1.40(3) | N3B-C5B | 1.46(3) |
| O4A-C5A | 1.40(3) | O4A-C8A | 1.46(3) |
| N3C-C1C | 1.37(3) | N3C-C4C | 1.40(3) |
| N3C-C5C | 1.49(3) | O3B-C7B | 1.37(3) |
| N2C-C2C | 1.36(3) | N2C-C1C | 1.43(4) |
| O2A-C6A | 1.45(3) | C1A-N2A | 1.40(3) |
| C2B-N1B | 1.27(3) | C2B-C3B | 1.39(3) |
| O3C-C7C | 1.37(3) | C4B-C3B | 1.34(3) |
| N2A-C2A | 1.34(4) | O2B-C6B | 1.39(3) |
| O4B-C8B | 1.40(3) | O4B-C5B | 1.41(3) |
| C6B-C7B | 1.53(3) | C6B-C5B | 1.56(3) |
| C8B-C7B | 1.52(3) | C8B-C9B | 1.54(3) |
| O5A-C9A | 1.43(4) | C7A-O3A | 1.41(3) |
| C7A-C8A | 1.54(3) | C7A-C6A | 1.54(3) |
| O5B-C9B | 1.42(3) | C4C-C3C | 1.34(3) |
| C3C-C2C | 1.39(4) | C4A-C3A | 1.31(4) |
| C8A-C9A | 1.53(4) | C2A-N1A | 1.28(3) |
| C2A-C3A | 1.45(4) | C5C-C6C | 1.56(4) |
| O2C-C6C | 1.43(3) | C5A-C6A | 1.51(3) |
| C2C-N1C | 1.33(4) | C7C-C6C | 1.46(4) |
| C7C-C8C | 1.55(3) | C8C-C9C | 1.46(4) |

---

Table S3. Bond angles (°) for compound **1**.

---

|            |          |            |          |
|------------|----------|------------|----------|
| O13-W1-O28 | 100.2(7) | O13-W1-O27 | 102.8(7) |
| O28-W1-O27 | 86.0(6)  | O13-W1-O17 | 103.0(7) |

## Supplementary Information

|                    |                    |
|--------------------|--------------------|
| O28-W1-O17156.7(6) | O27-W1-O1787.3(6)  |
| O13-W1-O11101.2(6) | O28-W1-O1190.6(6)  |
| O27-W1-O11156.0(6) | O17-W1-O1186.6(6)  |
| O13-W1-O21172.3(6) | O28-W1-O2185.0(5)  |
| O27-W1-O2183.1(5)  | O17-W1-O2172.1(5)  |
| O11-W1-O2173.0(5)  | O37-W2-O26102.9(7) |
| O37-W2-O31101.0(6) | O26-W2-O3188.9(6)  |
| O37-W2-O25102.2(7) | O26-W2-O25154.8(6) |
| O31-W2-O2587.6(6)  | O37-W2-O8 103.6(7) |
| O26-W2-O8 85.0(6)  | O31-W2-O8 155.3(5) |
| O25-W2-O8 87.9(6)  | O37-W2-O38170.6(6) |
| O26-W2-O3883.7(5)  | O31-W2-O3872.2(5)  |
| O25-W2-O3871.5(5)  | O8-W2-O38 83.4(5)  |
| O2-W3-O10 103.0(6) | O2-W3-O34 104.4(6) |
| O10-W3-O3490.8(7)  | O2-W3-O36 100.0(6) |
| O10-W3-O3686.3(6)  | O34-W3-O36155.5(6) |
| O2-W3-O9 102.1(6)  | O10-W3-O9 154.8(6) |
| O34-W3-O9 85.1(6)  | O36-W3-O9 87.2(6)  |
| O2-W3-O35 171.0(6) | O10-W3-O3571.8(5)  |
| O34-W3-O3583.2(5)  | O36-W3-O3572.7(5)  |
| O9-W3-O35 83.0(5)  | O14-W4-O9 102.0(6) |
| O14-W4-O23101.5(6) | O9-W4-O23 87.0(6)  |
| O14-W4-O25102.6(6) | O9-W4-O25 88.6(6)  |
| O23-W4-O25155.9(6) | O14-W4-O33102.7(6) |
| O9-W4-O33 155.3(6) | O23-W4-O3387.5(6)  |
| O25-W4-O3386.6(6)  | O14-W4-O38172.2(6) |
| O9-W4-O38 84.0(5)  | O23-W4-O3883.6(5)  |

## Supplementary Information

|                    |                    |
|--------------------|--------------------|
| O25-W4-O3872.4(5)  | O33-W4-O3871.4(5)  |
| O16-W5-O8 101.9(7) | O16-W5-O36104.7(7) |
| O8-W5-O36 90.0(6)  | O16-W5-O20100.3(7) |
| O8-W5-O20 84.7(6)  | O36-W5-O20155.0(6) |
| O16-W5-O7 101.9(7) | O8-W5-O7 155.9(6)  |
| O36-W5-O7 88.1(6)  | O20-W5-O7 87.0(6)  |
| O16-W5-O35173.9(7) | O8-W5-O35 83.8(5)  |
| O36-W5-O3572.9(5)  | O20-W5-O3582.2(5)  |
| O7-W5-O35 72.6(5)  | O6-W6-O12 102.9(7) |
| O6-W6-O32 101.2(6) | O12-W6-O3290.7(6)  |
| O6-W6-O28 103.0(6) | O12-W6-O2885.8(6)  |
| O32-W6-O28155.8(6) | O6-W6-O3 101.9(7)  |
| O12-W6-O3 155.1(5) | O32-W6-O3 87.0(6)  |
| O28-W6-O3 86.3(6)  | O6-W6-O22 171.5(6) |
| O12-W6-O2283.4(5)  | O32-W6-O2272.8(5)  |
| O28-W6-O2283.0(5)  | O3-W6-O22 72.2(5)  |
| O5-W7-O27 103.7(7) | O5-W7-O33 102.1(7) |
| O27-W7-O3389.8(6)  | O5-W7-O31 100.8(7) |
| O27-W7-O31155.4(6) | O33-W7-O3187.2(6)  |
| O5-W7-O12 103.2(7) | O27-W7-O1285.5(6)  |
| O33-W7-O12154.7(5) | O31-W7-O1286.9(6)  |
| O5-W7-O38 170.2(6) | O27-W7-O3883.8(5)  |
| O33-W7-O3871.3(5)  | O31-W7-O3872.1(5)  |
| O12-W7-O3883.4(5)  | O1-W8-O34 103.4(6) |
| O1-W8-O4 102.5(6)  | O34-W8-O4 87.9(6)  |
| O1-W8-O23 101.8(6) | O34-W8-O2385.3(6)  |
| O4-W8-O23 155.7(6) | O1-W8-O17 101.3(6) |

## Supplementary Information

|             |          |             |          |
|-------------|----------|-------------|----------|
| O34-W8-O17  | 155.3(6) | O4-W8-O17   | 87.1(6)  |
| O23-W8-O17  | 89.5(6)  | O1-W8-O21   | 172.1(5) |
| O34-W8-O21  | 182.9(5) | O4-W8-O21   | 72.7(5)  |
| O23-W8-O21  | 183.3(5) | O17-W8-O21  | 172.5(5) |
| O39-W9-O15  | 104.1(7) | O39-W9-O4   | 103.9(7) |
| O15-W9-O4   | 90.2(6)  | O39-W9-O40  | 101.3(6) |
| O15-W9-O40  | 86.2(6)  | O4-W9-O40   | 154.6(6) |
| O39-W9-O11  | 100.0(7) | O15-W9-O11  | 155.6(6) |
| O4-W9-O11   | 87.8(6)  | O40-W9-O11  | 185.3(6) |
| O39-W9-O21  | 171.9(6) | O15-W9-O21  | 183.2(5) |
| O4-W9-O21   | 72.2(6)  | O40-W9-O21  | 182.5(5) |
| O11-W9-O21  | 73.0(5)  | O19-W10-O20 | 101.6(7) |
| O19-W10-O26 | 101.4(8) | O20-W10-O26 | 85.7(6)  |
| O19-W10-O29 | 103.9(7) | O20-W10-O29 | 90.8(6)  |
| O26-W10-O29 | 154.7(6) | O19-W10-O32 | 102.1(6) |
| O20-W10-O32 | 156.2(6) | O26-W10-O32 | 87.5(6)  |
| O29-W10-O32 | 85.7(6)  | O19-W10-O22 | 173.1(6) |
| O20-W10-O22 | 84.0(5)  | O26-W10-O22 | 82.8(5)  |
| O29-W10-O22 | 71.8(5)  | O32-W10-O22 | 72.5(5)  |
| O24-W11-O18 | 104.1(7) | O24-W11-O7  | 101.7(7) |
| O18-W11-O7  | 90.3(6)  | O24-W11-O15 | 102.9(7) |
| O18-W11-O15 | 85.4(6)  | O7-W11-O15  | 155.3(6) |
| O24-W11-O10 | 101.7(7) | O18-W11-O10 | 154.1(7) |
| O7-W11-O10  | 86.5(6)  | O15-W11-O10 | 86.9(6)  |
| O24-W11-O35 | 171.2(6) | O18-W11-O35 | 83.4(6)  |
| O7-W11-O35  | 73.3(5)  | O15-W11-O35 | 82.0(5)  |
| O10-W11-O35 | 71.1(5)  | O30-W12-O3  | 99.3(7)  |

## Supplementary Information

|             |          |             |          |
|-------------|----------|-------------|----------|
| O30-W12-O18 | 104.5(8) | O3-W12-O18  | 156.2(7) |
| O30-W12-O40 | 101.5(7) | O3-W12-O40  | 91.0(6)  |
| O18-W12-O40 | 86.0(6)  | O30-W12-O29 | 103.3(7) |
| O3-W12-O29  | 86.5(6)  | O18-W12-O29 | 86.3(6)  |
| O40-W12-O29 | 155.1(6) | O30-W12-O22 | 170.9(6) |
| O3-W12-O22  | 73.5(5)  | O18-W12-O22 | 82.7(6)  |
| O40-W12-O22 | 84.3(5)  | O29-W12-O22 | 71.2(5)  |
| O21-P1-O22  | 110.3(7) | O21-P1-O35  | 109.5(7) |
| O22-P1-O35  | 108.4(7) | O21-P1-O38  | 109.2(7) |
| O22-P1-O38  | 110.0(7) | O35-P1-O38  | 109.3(8) |
| W12-O3-W6   | 125.8(7) | W9-O4-W8    | 127.0(8) |
| W11-O7-W5   | 125.3(7) | W5-O8-W2    | 152.4(8) |
| W4-O9-W3    | 150.8(7) | W3-O10-W11  | 127.9(7) |
| W9-O11-W1   | 124.8(7) | W6-O12-W7   | 152.2(7) |
| W9-O15-W11  | 152.2(8) | W8-O17-W1   | 125.2(7) |
| W11-O18-W12 | 152.1(9) | W10-O20-W5  | 152.9(9) |
| P1-O21-W8   | 126.5(7) | P1-O21-W1   | 125.5(7) |
| W8-O21-W1   | 90.1(4)  | P1-O21-W9   | 125.7(8) |
| W8-O21-W9   | 88.1(4)  | W1-O21-W9   | 89.1(4)  |
| P1-O22-W10  | 126.4(7) | P1-O22-W12  | 125.6(7) |
| W10-O22-W12 | 89.7(4)  | P1-O22-W6   | 125.9(7) |
| W10-O22-W6  | 88.9(4)  | W12-O22-W6  | 88.4(4)  |
| W4-O23-W8   | 151.2(8) | W4-O25-W2   | 126.2(7) |
| W10-O26-W2  | 151.4(8) | W7-O27-W1   | 151.4(8) |
| W6-O28-W1   | 150.9(7) | W10-O29-W12 | 127.2(8) |
| W7-O31-W2   | 126.4(7) | W6-O32-W10  | 125.8(7) |
| W7-O33-W4   | 127.2(7) | W8-O34-W3   | 152.9(8) |

## Supplementary Information

|             |           |             |           |
|-------------|-----------|-------------|-----------|
| P1-O35-W3   | 125.7(8)  | P1-O35-W5   | 126.3(7)  |
| W3-O35-W5   | 88.3(4)   | P1-O35-W11  | 126.5(7)  |
| W3-O35-W11  | 89.1(4)   | W5-O35-W11  | 88.6(4)   |
| W5-O36-W3   | 126.0(7)  | P1-O38-W4   | 126.0(7)  |
| P1-O38-W7   | 124.9(7)  | W4-O38-W7   | 90.0(5)   |
| P1-O38-W2   | 125.5(7)  | W4-O38-W2   | 89.9(4)   |
| W7-O38-W2   | 89.3(4)   | W9-O40-W12  | 151.3(8)  |
| C2B-N2B-C1B | 124.9(17) | C1A-N3A-C4A | 122.(2)   |
| C1A-N3A-C5A | 117.4(19) | C4A-N3A-C5A | 120.(2)   |
| C5C-O4C-C8C | 111.(2)   | C4B-N3B-C1B | 120.(2)   |
| C4B-N3B-C5B | 124.6(19) | C1B-N3B-C5B | 115.(2)   |
| C5A-O4A-C8A | 111.0(18) | C1C-N3C-C4C | 124.(2)   |
| C1C-N3C-C5C | 113.(2)   | C4C-N3C-C5C | 124.(2)   |
| C2C-N2C-C1C | 124.(2)   | O1A-C1A-N3A | 122.(2)   |
| O1A-C1A-N2A | 124.(2)   | N3A-C1A-N2A | 114.(2)   |
| N1B-C2B-N2B | 116.(2)   | N1B-C2B-C3B | 126.(2)   |
| N2B-C2B-C3B | 117.(2)   | C3B-C4B-N3B | 121.(2)   |
| C2A-N2A-C1A | 127.(2)   | C8B-O4B-C5B | 108.3(19) |
| O2B-C6B-C7B | 110.(2)   | O2B-C6B-C5B | 107.(2)   |
| C7B-C6B-C5B | 104.(2)   | O4B-C8B-C7B | 107.0(19) |
| O4B-C8B-C9B | 107.(2)   | C7B-C8B-C9B | 121.(2)   |
| C4B-C3B-C2B | 121.(2)   | O3A-C7A-C8A | 113.(2)   |
| O3A-C7A-C6A | 114.(2)   | C8A-C7A-C6A | 101.5(18) |
| C3C-C4C-N3C | 121.(2)   | C4C-C3C-C2C | 118.(2)   |
| C3A-C4A-N3A | 121.(3)   | O4A-C8A-C7A | 103.1(19) |
| O4A-C8A-C9A | 110.(2)   | C7A-C8A-C9A | 120.(2)   |
| O1C-C1C-N3C | 127.(3)   | O1C-C1C-N2C | 120.(2)   |

## Supplementary Information

|             |           |             |           |
|-------------|-----------|-------------|-----------|
| N3C-C1C-N2C | 112.(2)   | N1A-C2A-N2A | 120.(3)   |
| N1A-C2A-C3A | 125.(3)   | N2A-C2A-C3A | 115.(2)   |
| O4C-C5C-N3C | 104.(2)   | O4C-C5C-C6C | 103.0(18) |
| N3C-C5C-C6C | 115.(2)   | O1B-C1B-N2B | 122.(2)   |
| O1B-C1B-N3B | 122.(2)   | N2B-C1B-N3B | 116.(2)   |
| O4A-C5A-N3A | 107.2(19) | O4A-C5A-C6A | 108.(2)   |
| N3A-C5A-C6A | 109.1(19) | N2C-C2C-N1C | 117.(3)   |
| N2C-C2C-C3C | 120.(2)   | N1C-C2C-C3C | 123.(3)   |
| O3C-C7C-C6C | 120.(3)   | O3C-C7C-C8C | 109.(2)   |
| C6C-C7C-C8C | 104.(2)   | C7C-C6C-O2C | 108.(2)   |
| C7C-C6C-C5C | 109.(2)   | O2C-C6C-C5C | 114.(2)   |
| O5A-C9A-C8A | 109.(2)   | C9C-C8C-O4C | 111.(3)   |
| C9C-C8C-C7C | 116.(2)   | O4C-C8C-C7C | 107.(2)   |
| O2A-C6A-C5A | 110.(2)   | O2A-C6A-C7A | 107.8(19) |
| C5A-C6A-C7A | 103.(2)   | C4A-C3A-C2A | 120.(3)   |
| O5C-C9C-C8C | 110.(2)   | O5B-C9B-C8B | 110.(2)   |
| O3B-C7B-C8B | 113.(2)   | O3B-C7B-C6B | 115.(2)   |
| C8B-C7B-C6B | 100.7(19) | O4B-C5B-N3B | 106.(2)   |
| O4B-C5B-C6B | 107.(2)   | N3B-C5B-C6B | 114.(2)   |

Table S4. Anisotropic atomic displacement parameters ( $\text{\AA}^2$ ) for compound **1**.

The anisotropic atomic displacement factor exponent takes the form:  $-2\pi^2[ h^2 a^2 U_{11} + \dots + 2 h k a^* b^* U_{12} ]$

|    | U11       | U22       | U33       | U23       | U13        | U12        |
|----|-----------|-----------|-----------|-----------|------------|------------|
| W1 | 0.0127(3) | 0.0277(4) | 0.0205(4) | 0.0027(3) | -0.0010(3) | 0.0017(3)  |
| W2 | 0.0141(3) | 0.0231(4) | 0.0237(4) | 0.0027(3) | 0.0005(3)  | -0.0033(3) |

## Supplementary Information

|     |            |            |            |            |            |            |
|-----|------------|------------|------------|------------|------------|------------|
| W3  | 0.0183(3)  | 0.0274(4)  | 0.0162(3)  | 0.0040(3)  | -0.0013(3) | -0.0018(3) |
| W4  | 0.0184(4)  | 0.0228(4)  | 0.0227(4)  | -0.0028(3) | 0.0010(3)  | -0.0026(3) |
| W5  | 0.0139(3)  | 0.0262(4)  | 0.0214(4)  | 0.0044(3)  | -0.0024(3) | 0.0016(3)  |
| W6  | 0.0165(3)  | 0.0328(4)  | 0.0163(3)  | 0.0027(3)  | 0.0000(3)  | 0.0013(3)  |
| W7  | 0.0204(4)  | 0.0203(4)  | 0.0258(4)  | 0.0053(3)  | -0.0031(3) | -0.0009(3) |
| W8  | 0.0129(3)  | 0.0248(4)  | 0.0198(4)  | -0.0001(3) | 0.0019(3)  | -0.0006(3) |
| W9  | 0.0138(3)  | 0.0240(4)  | 0.0238(4)  | 0.0002(3)  | -0.0009(3) | -0.0041(3) |
| W10 | 0.0143(3)  | 0.0303(4)  | 0.0195(4)  | 0.0015(3)  | 0.0022(3)  | 0.0014(3)  |
| W11 | 0.0219(4)  | 0.0200(4)  | 0.0238(4)  | 0.0038(3)  | -0.0035(3) | -0.0017(3) |
| W12 | 0.0197(4)  | 0.0256(4)  | 0.0207(4)  | -0.0039(3) | -0.0002(3) | -0.0001(3) |
| P1  | 0.0114(18) | 0.0057(16) | 0.0096(17) | 0.0003(13) | 0.0014(14) | 0.0010(14) |
| O39 | 0.019(7)   | 0.049(10)  | 0.025(7)   | -0.009(7)  | 0.003(6)   | -0.010(7)  |
| O1  | 0.018(6)   | 0.021(7)   | 0.030(7)   | -0.008(5)  | 0.004(6)   | -0.007(5)  |
| O2  | 0.029(7)   | 0.038(8)   | 0.017(6)   | 0.007(6)   | 0.002(6)   | -0.002(7)  |
| O3  | 0.029(8)   | 0.028(8)   | 0.023(7)   | 0.001(6)   | -0.005(6)  | -0.006(6)  |
| O4  | 0.017(7)   | 0.047(9)   | 0.026(7)   | 0.007(7)   | -0.007(6)  | 0.000(6)   |
| O5  | 0.045(10)  | 0.025(8)   | 0.043(9)   | 0.010(7)   | -0.009(7)  | -0.004(7)  |
| O6  | 0.023(7)   | 0.046(9)   | 0.024(7)   | 0.013(7)   | 0.001(6)   | 0.000(7)   |
| O7  | 0.021(7)   | 0.028(8)   | 0.027(8)   | 0.000(6)   | 0.002(6)   | 0.002(6)   |
| O8  | 0.025(7)   | 0.023(7)   | 0.020(6)   | 0.008(5)   | -0.007(5)  | -0.006(6)  |
| O9  | 0.016(6)   | 0.027(7)   | 0.019(6)   | 0.001(6)   | -0.002(5)  | 0.000(5)   |
| O10 | 0.022(7)   | 0.040(8)   | 0.032(8)   | 0.022(7)   | 0.002(6)   | -0.013(7)  |
| O11 | 0.022(7)   | 0.026(7)   | 0.023(7)   | 0.006(6)   | -0.010(6)  | -0.006(6)  |
| O12 | 0.022(7)   | 0.016(6)   | 0.024(6)   | 0.009(5)   | -0.004(5)  | -0.006(6)  |
| O13 | 0.025(7)   | 0.032(8)   | 0.032(8)   | 0.002(7)   | -0.009(6)  | 0.001(6)   |
| O14 | 0.026(7)   | 0.030(7)   | 0.024(7)   | -0.006(6)  | -0.002(6)  | 0.001(6)   |
| O15 | 0.019(7)   | 0.031(8)   | 0.026(7)   | -0.002(6)  | -0.001(6)  | 0.000(6)   |

## Supplementary Information

|     |           |           |           |            |             |            |
|-----|-----------|-----------|-----------|------------|-------------|------------|
| O16 | 0.014(7)  | 0.051(10) | 0.037(9)  | 0.007(8)   | -0.010(6)   | 0.004(7)   |
| O17 | 0.020(3)  | 0.021(3)  | 0.021(3)  | 0.0004(14) | -0.0003(14) | 0.0008(14) |
| O18 | 0.018(7)  | 0.049(10) | 0.025(7)  | 0.000(7)   | 0.003(6)    | 0.001(7)   |
| O19 | 0.019(7)  | 0.063(11) | 0.030(8)  | -0.002(8)  | 0.007(6)    | 0.014(7)   |
| O20 | 0.020(7)  | 0.036(8)  | 0.020(7)  | -0.005(6)  | -0.002(5)   | -0.001(6)  |
| O21 | 0.013(6)  | 0.021(7)  | 0.023(7)  | 0.006(5)   | -0.001(5)   | -0.010(5)  |
| O22 | 0.020(6)  | 0.026(7)  | 0.010(5)  | 0.004(5)   | 0.006(5)    | -0.001(5)  |
| O23 | 0.018(6)  | 0.033(8)  | 0.019(7)  | 0.004(6)   | 0.008(5)    | 0.002(6)   |
| O24 | 0.038(9)  | 0.021(7)  | 0.039(8)  | 0.000(6)   | 0.000(7)    | 0.006(7)   |
| O25 | 0.014(6)  | 0.032(8)  | 0.031(8)  | -0.008(6)  | -0.004(5)   | -0.002(6)  |
| O26 | 0.024(7)  | 0.035(8)  | 0.015(6)  | -0.004(6)  | -0.003(5)   | 0.005(6)   |
| O27 | 0.020(7)  | 0.034(9)  | 0.030(8)  | 0.000(7)   | -0.003(6)   | 0.004(6)   |
| O28 | 0.021(6)  | 0.029(8)  | 0.014(6)  | -0.007(6)  | 0.000(5)    | 0.003(6)   |
| O29 | 0.020(7)  | 0.036(9)  | 0.025(8)  | -0.006(6)  | 0.000(6)    | 0.004(6)   |
| O30 | 0.026(8)  | 0.046(10) | 0.029(8)  | -0.011(7)  | -0.005(6)   | 0.006(7)   |
| O31 | 0.012(6)  | 0.033(8)  | 0.022(7)  | 0.013(6)   | 0.001(5)    | -0.005(5)  |
| O32 | 0.016(6)  | 0.033(8)  | 0.017(6)  | 0.007(6)   | 0.004(5)    | -0.001(5)  |
| O33 | 0.021(7)  | 0.024(7)  | 0.036(8)  | 0.000(6)   | -0.005(6)   | 0.007(6)   |
| O34 | 0.011(6)  | 0.044(9)  | 0.021(7)  | 0.004(6)   | 0.001(5)    | -0.006(6)  |
| O35 | 0.015(6)  | 0.037(8)  | 0.009(6)  | 0.003(5)   | -0.004(5)   | -0.001(5)  |
| O36 | 0.020(7)  | 0.032(8)  | 0.020(7)  | 0.002(6)   | -0.002(5)   | -0.009(6)  |
| O37 | 0.011(6)  | 0.047(9)  | 0.032(8)  | 0.003(7)   | -0.001(6)   | -0.001(6)  |
| O38 | 0.011(6)  | 0.028(7)  | 0.027(7)  | -0.002(6)  | 0.001(5)    | -0.002(5)  |
| O40 | 0.014(6)  | 0.029(8)  | 0.024(7)  | -0.006(6)  | -0.002(5)   | 0.002(5)   |
| N2B | 0.016(8)  | 0.043(10) | 0.021(8)  | 0.006(7)   | 0.001(6)    | -0.007(7)  |
| O1A | 0.036(9)  | 0.039(9)  | 0.046(10) | 0.005(8)   | 0.004(8)    | -0.002(8)  |
| O5C | 0.055(12) | 0.085(15) | 0.040(10) | -0.003(10) | -0.011(9)   | 0.037(12)  |

## Supplementary Information

|     |           |           |           |            |            |            |
|-----|-----------|-----------|-----------|------------|------------|------------|
| O1B | 0.046(9)  | 0.029(8)  | 0.022(7)  | 0.010(6)   | 0.007(6)   | 0.007(7)   |
| O1C | 0.038(9)  | 0.057(12) | 0.034(9)  | 0.007(8)   | -0.005(7)  | 0.003(9)   |
| N3A | 0.033(10) | 0.026(9)  | 0.029(9)  | -0.006(8)  | -0.003(8)  | 0.001(8)   |
| O4C | 0.044(11) | 0.086(16) | 0.047(12) | -0.002(11) | -0.003(9)  | 0.006(11)  |
| N3B | 0.030(9)  | 0.028(9)  | 0.024(9)  | -0.002(7)  | 0.006(7)   | -0.006(7)  |
| O4A | 0.041(9)  | 0.040(10) | 0.044(10) | 0.002(8)   | 0.003(8)   | 0.024(8)   |
| N3C | 0.054(13) | 0.032(10) | 0.029(10) | 0.001(8)   | -0.005(9)  | -0.003(10) |
| O3B | 0.028(9)  | 0.069(13) | 0.058(12) | -0.014(10) | 0.011(8)   | -0.006(9)  |
| N2C | 0.042(12) | 0.039(12) | 0.050(13) | 0.002(10)  | 0.008(10)  | 0.003(10)  |
| O2A | 0.081(15) | 0.051(12) | 0.036(10) | -0.005(9)  | -0.011(10) | -0.017(11) |
| C1A | 0.034(11) | 0.029(11) | 0.024(10) | 0.003(9)   | -0.007(9)  | 0.010(9)   |
| C2B | 0.014(9)  | 0.054(15) | 0.039(12) | -0.012(11) | 0.008(9)   | 0.012(10)  |
| N1B | 0.034(11) | 0.039(12) | 0.054(13) | 0.003(10)  | -0.012(9)  | 0.000(9)   |
| O3C | 0.088(17) | 0.054(13) | 0.070(15) | -0.032(11) | -0.013(13) | 0.013(12)  |
| C4B | 0.029(10) | 0.033(11) | 0.033(11) | 0.006(9)   | 0.004(9)   | 0.010(9)   |
| N2A | 0.038(10) | 0.027(10) | 0.034(10) | 0.001(8)   | -0.015(8)  | 0.000(8)   |
| O2B | 0.059(13) | 0.081(16) | 0.058(13) | 0.025(12)  | 0.009(11)  | 0.030(12)  |
| O4B | 0.041(10) | 0.056(12) | 0.041(10) | -0.016(9)  | -0.014(8)  | 0.006(8)   |
| C6B | 0.025(10) | 0.034(12) | 0.040(12) | 0.004(10)  | 0.011(9)   | 0.004(9)   |
| C8B | 0.049(14) | 0.022(11) | 0.033(12) | -0.001(9)  | 0.004(10)  | -0.006(10) |
| C3B | 0.023(9)  | 0.034(11) | 0.025(10) | 0.017(8)   | -0.006(8)  | -0.004(9)  |
| O5A | 0.047(11) | 0.067(14) | 0.059(12) | 0.022(11)  | 0.012(9)   | 0.022(10)  |
| C7A | 0.063(16) | 0.017(10) | 0.025(11) | 0.008(8)   | -0.004(10) | 0.000(10)  |
| O5B | 0.12(2)   | 0.061(15) | 0.050(13) | 0.014(11)  | 0.007(13)  | -0.016(14) |
| C4C | 0.042(13) | 0.019(10) | 0.047(14) | 0.020(10)  | 0.004(11)  | -0.009(10) |
| C3C | 0.044(13) | 0.022(11) | 0.046(14) | -0.011(10) | 0.012(11)  | 0.018(10)  |
| C4A | 0.020(11) | 0.09(2)   | 0.040(14) | 0.015(14)  | -0.022(10) | -0.003(12) |

## Supplementary Information

|     |           |           |           |             |            |            |
|-----|-----------|-----------|-----------|-------------|------------|------------|
| C8A | 0.061(16) | 0.028(12) | 0.025(11) | 0.007(9)    | -0.017(11) | -0.011(11) |
| O3A | 0.068(14) | 0.10(2)   | 0.029(10) | 0.002(11)   | -0.005(9)  | 0.009(13)  |
| C1C | 0.036(13) | 0.058(18) | 0.033(13) | 0.013(12)   | 0.004(10)  | -0.012(12) |
| C2A | 0.044(14) | 0.055(16) | 0.035(13) | -0.014(12)  | -0.028(11) | 0.022(13)  |
| C5C | 0.048(14) | 0.058(16) | 0.021(11) | 0.025(11)   | -0.003(10) | -0.022(13) |
| O2C | 0.064(14) | 0.075(16) | 0.061(14) | 0.004(12)   | -0.012(11) | 0.026(12)  |
| C1B | 0.020(9)  | 0.069(17) | 0.017(10) | 0.017(11)   | 0.002(8)   | -0.008(10) |
| C5A | 0.045(13) | 0.018(10) | 0.038(13) | -0.005(9)   | -0.005(10) | 0.006(10)  |
| C2C | 0.066(17) | 0.023(11) | 0.039(14) | 0.012(10)   | 0.017(12)  | -0.009(12) |
| N1A | 0.09(2)   | 0.049(15) | 0.046(14) | -0.017(12)  | -0.033(14) | 0.009(14)  |
| C7C | 0.030(12) | 0.060(18) | 0.042(14) | 0.004(13)   | 0.009(10)  | 0.001(12)  |
| C6C | 0.034(13) | 0.044(15) | 0.056(16) | 0.007(12)   | 0.013(11)  | -0.004(11) |
| C9A | 0.056(18) | 0.08(2)   | 0.034(14) | -0.022(15)  | 0.009(12)  | 0.000(16)  |
| C8C | 0.043(6)  | 0.043(6)  | 0.043(6)  | -0.0002(14) | 0.0000(14) | 0.0000(14) |
| C6A | 0.040(13) | 0.057(17) | 0.034(13) | -0.023(12)  | -0.009(10) | -0.005(12) |
| N1C | 0.052(14) | 0.075(19) | 0.052(15) | 0.006(14)   | 0.016(12)  | -0.006(13) |
| C3A | 0.057(17) | 0.041(16) | 0.045(15) | 0.021(12)   | -0.006(13) | -0.008(13) |
| C9C | 0.047(17) | 0.13(3)   | 0.056(19) | 0.06(2)     | 0.017(15)  | 0.02(2)    |
| C9B | 0.08(2)   | 0.041(15) | 0.018(11) | 0.004(10)   | 0.003(12)  | -0.020(14) |
| C7B | 0.039(13) | 0.046(14) | 0.041(13) | -0.006(11)  | 0.004(11)  | -0.015(12) |
| C5B | 0.044(14) | 0.052(16) | 0.032(12) | -0.008(11)  | -0.002(11) | -0.014(12) |

Table S5. Atomic coordinates and equivalent isotropic atomic displacement parameters ( $\text{\AA}^2$ ) for Cyt\_PW\_20240717 compound **2**.

U(eq) is defined as one third of the trace of the orthogonalized Uij tensor.

---

| x/a | y/b | z/c | U(eq) |
|-----|-----|-----|-------|
|-----|-----|-----|-------|

## Supplementary Information

|      |             |             |             |           |
|------|-------------|-------------|-------------|-----------|
| W1   | 0.57710(10) | 0.28997(10) | 0.78065(15) | 0.0308(6) |
| W2   | 0.38017(10) | 0.61625(10) | 0.16036(15) | 0.0301(6) |
| W3   | 0.61979(10) | 0.38376(10) | 0.16032(15) | 0.0297(6) |
| W4   | 0.42284(10) | 0.71000(10) | 0.78051(15) | 0.0317(6) |
| W5   | 0.52492(11) | 0.19473(11) | 0.97843(16) | 0.0354(6) |
| W6   | 0.53193(11) | 0.34348(11) | 0.97580(16) | 0.0361(6) |
| W7   | 0.46805(11) | 0.65660(12) | 0.97600(16) | 0.0364(7) |
| W8   | 0.61098(11) | 0.07879(11) | 0.35675(16) | 0.0378(7) |
| W9   | 0.60919(12) | 0.08510(11) | 0.68498(17) | 0.0385(7) |
| W10  | 0.47501(11) | 0.80517(11) | 0.97859(16) | 0.0366(7) |
| W11  | 0.46523(12) | 0.07734(11) | 0.35713(17) | 0.0392(7) |
| W12  | 0.38919(11) | 0.92120(11) | 0.35675(17) | 0.0382(7) |
| W13  | 0.42043(12) | 0.83761(11) | 0.52752(17) | 0.0384(7) |
| W14  | 0.39092(12) | 0.91493(11) | 0.68504(17) | 0.0389(7) |
| W15  | 0.53482(12) | 0.92262(11) | 0.35717(17) | 0.0394(7) |
| W16  | 0.47349(12) | 0.08357(11) | 0.68508(17) | 0.0397(7) |
| W17  | 0.52659(12) | 0.91642(11) | 0.68497(17) | 0.0400(7) |
| W18  | 0.64113(11) | 0.00199(11) | 0.51481(18) | 0.0397(7) |
| W19  | 0.57956(12) | 0.16227(11) | 0.52752(17) | 0.0382(7) |
| W20  | 0.35895(11) | 0.99812(11) | 0.51489(18) | 0.0400(7) |
| P2   | 0.666667    | 0.333333    | 0.9761(13)  | 0.004000  |
| P3   | 0.333333    | 0.666667    | 0.9767(13)  | 0.004000  |
| P1   | 0.4998(6)   | 0.9996(6)   | 0.5194(8)   | 0.004000  |
| O4   | 0.5812(15)  | 0.0018(15)  | 0.304(2)    | 0.032(9)  |
| O5   | 0.4184(17)  | 0.9984(15)  | 0.306(2)    | 0.040(10) |
| O13A | 0.6313(14)  | 0.2683(14)  | 0.005(2)    | 0.025(8)  |
| O2B  | 0.3682(15)  | 0.7316(15)  | 0.006(2)    | 0.031(8)  |

## Supplementary Information

|     |            |            |          |           |
|-----|------------|------------|----------|-----------|
| O6  | 0.6043(16) | 0.9405(17) | 0.427(2) | 0.038(9)  |
| O7  | 0.4511(14) | 0.9993(14) | 0.467(2) | 0.027(8)  |
| O3B | 0.4866(14) | 0.7394(14) | 0.005(2) | 0.023(8)  |
| O1A | 0.5512(15) | 0.3277(15) | 0.860(2) | 0.030(8)  |
| O8  | 0.3715(16) | 0.8442(14) | 0.615(2) | 0.036(10) |
| O9  | 0.3973(16) | 0.0605(16) | 0.428(2) | 0.041(10) |
| O2A | 0.5144(16) | 0.2616(18) | 0.003(2) | 0.037(10) |
| O4B | 0.3952(14) | 0.5997(14) | 0.261(2) | 0.026(8)  |
| O5B | 0.4489(14) | 0.6714(14) | 0.861(2) | 0.026(8)  |
| O10 | 0.6593(15) | 0.1266(18) | 0.279(3) | 0.046(11) |
| O6B | 0.4530(17) | 0.7727(15) | 0.863(2) | 0.034(9)  |
| O11 | 0.3350(17) | 0.9370(15) | 0.425(2) | 0.038(10) |
| O12 | 0.5231(16) | 0.1550(15) | 0.617(3) | 0.042(10) |
| O13 | 0.5275(16) | 0.0575(17) | 0.580(2) | 0.043(10) |
| O3A | 0.6028(15) | 0.3984(15) | 0.258(2) | 0.034(9)  |
| O4A | 0.5198(18) | 0.2623(18) | 0.709(3) | 0.050(12) |
| O14 | 0.4757(17) | 0.8466(16) | 0.617(2) | 0.040(9)  |
| O15 | 0.5878(16) | 0.9427(15) | 0.596(2) | 0.039(10) |
| O5A | 0.5466(16) | 0.2257(15) | 0.862(2) | 0.035(9)  |
| O16 | 0.5365(15) | 0.0714(16) | 0.331(2) | 0.035(9)  |
| O6A | 0.6308(16) | 0.2646(16) | 0.741(2) | 0.039(9)  |
| O17 | 0.3846(15) | 0.8670(15) | 0.449(2) | 0.033(9)  |
| O18 | 0.3850(16) | 0.7644(14) | 0.505(2) | 0.033(10) |
| O19 | 0.4631(15) | 0.9287(16) | 0.331(2) | 0.035(9)  |
| O20 | 0.6450(16) | 0.0609(16) | 0.595(2) | 0.033(9)  |
| O7B | 0.4528(17) | 0.6404(17) | 0.097(2) | 0.041(10) |
| O7A | 0.4546(19) | 0.1369(19) | 0.970(3) | 0.053(12) |

## Supplementary Information

|      |            |            |          |            |
|------|------------|------------|----------|------------|
| O21  | 0.7066(18) | 0.0032(18) | 0.537(2) | 0.046(11)  |
| O22  | 0.6289(17) | 0.1558(16) | 0.616(2) | 0.044(11)  |
| O23  | 0.6658(17) | 0.0638(17) | 0.428(2) | 0.042(10)  |
| O24  | 0.3433(18) | 0.8741(15) | 0.279(3) | 0.047(11)  |
| O25  | 0.5493(16) | 0.0015(15) | 0.464(2) | 0.039(10)  |
| O26  | 0.4871(17) | 0.8692(15) | 0.450(3) | 0.045(11)  |
| O8B  | 0.3649(15) | 0.6307(15) | 0.740(2) | 0.033(9)   |
| O27  | 0.3551(16) | 0.9391(16) | 0.595(2) | 0.034(9)   |
| O28  | 0.6147(16) | 0.1340(16) | 0.447(2) | 0.037(10)  |
| O48  | 0.5123(16) | 0.1316(15) | 0.447(3) | 0.044(10)  |
| O8A  | 0.5825(18) | 0.4284(18) | 0.960(2) | 0.045(11)  |
| O29  | 0.5468(16) | 0.0951(17) | 0.739(2) | 0.041(9)   |
| O9A  | 0.7016(17) | 0.3985(19) | 0.174(2) | 0.051(11)  |
| O10A | 0.5462(17) | 0.3598(17) | 0.095(2) | 0.041(10)  |
| O9B  | 0.4302(17) | 0.8456(16) | 0.963(2) | 0.050(11)  |
| O30  | 0.2945(19) | 0.9970(18) | 0.537(3) | 0.052(12)  |
| O31  | 0.667(2)   | 0.1149(19) | 0.761(3) | 0.056(12)  |
| O32  | 0.4129(17) | 0.0589(17) | 0.597(2) | 0.043(10)  |
| O33  | 0.4550(16) | 0.9046(16) | 0.738(2) | 0.039(9)   |
| O34  | 0.4752(17) | 0.9448(17) | 0.580(3) | 0.048(10)  |
| O35  | 0.6155(17) | 0.2363(16) | 0.503(3) | 0.039(10)  |
| O11A | 0.5390(16) | 0.1924(14) | 0.095(2) | 0.030(9)   |
| O36  | 0.5375(18) | 0.8769(17) | 0.278(3) | 0.057(13)  |
| O12A | 0.666667   | 0.333333   | 0.872(3) | 0.0130(19) |
| O37  | 0.5656(17) | 0.9985(16) | 0.714(3) | 0.053(13)  |
| O10B | 0.5363(18) | 0.6635(19) | 0.966(3) | 0.054(11)  |
| O11B | 0.4618(16) | 0.8091(16) | 0.097(2) | 0.038(9)   |

## Supplementary Information

|      |            |            |          |           |
|------|------------|------------|----------|-----------|
| O38  | 0.5536(19) | 0.8900(19) | 0.759(3) | 0.058(12) |
| O12B | 0.4002(18) | 0.6987(17) | 0.173(2) | 0.042(10) |
| O39  | 0.4352(19) | 0.0011(17) | 0.715(3) | 0.061(13) |
| O40  | 0.446(2)   | 0.110(2)   | 0.763(3) | 0.060(12) |
| O13B | 0.333333   | 0.666667   | 0.875(4) | 0.024(14) |
| O21B | 0.4821(19) | 0.7370(19) | 0.713(3) | 0.054(11) |
| O22B | 0.5445(19) | 0.8610(18) | 0.971(3) | 0.058(12) |
| O21A | 0.462(2)   | 0.334(2)   | 0.965(3) | 0.064(13) |
| O1   | 0.4638(18) | 0.1251(17) | 0.280(3) | 0.059(13) |
| C209 | 0.492(3)   | 0.247(2)   | 0.509(3) | 0.034(13) |
| C109 | 0.510(2)   | 0.752(2)   | 0.506(3) | 0.029(13) |
| O301 | 0.3340(18) | 0.8861(17) | 0.761(3) | 0.052(12) |
| N101 | 0.616(3)   | 0.792(3)   | 0.513(5) | 0.089(18) |
| N203 | 0.386(4)   | 0.210(4)   | 0.516(5) | 0.099(19) |
| O205 | 0.348(2)   | 0.215(3)   | 0.655(4) | 0.091(17) |
| O105 | 0.649(3)   | 0.786(2)   | 0.655(4) | 0.095(18) |
| C108 | 0.566(3)   | 0.777(3)   | 0.543(4) | 0.044(14) |
| O204 | 0.324(3)   | 0.181(2)   | 0.392(4) | 0.091(16) |
| N102 | 0.475(2)   | 0.738(2)   | 0.354(3) | 0.053(14) |
| N202 | 0.532(2)   | 0.265(2)   | 0.353(3) | 0.054(14) |
| O104 | 0.678(3)   | 0.821(3)   | 0.391(5) | 0.12(3)   |
| C107 | 0.669(3)   | 0.810(3)   | 0.565(5) | 0.059(16) |
| O103 | 0.776(2)   | 0.899(3)   | 0.579(5) | 0.13(2)   |
| C208 | 0.437(3)   | 0.226(3)   | 0.544(4) | 0.049(15) |
| N103 | 0.571(3)   | 0.779(3)   | 0.375(4) | 0.090(18) |
| C106 | 0.623(4)   | 0.800(4)   | 0.426(6) | 0.077(19) |
| O102 | 0.622(3)   | 0.774(3)   | 0.847(5) | 0.13(2)   |

## Supplementary Information

|      |          |          |          |           |
|------|----------|----------|----------|-----------|
| N201 | 0.420(2) | 0.216(3) | 0.381(5) | 0.104(19) |
| C105 | 0.517(3) | 0.757(3) | 0.406(3) | 0.066(17) |
| C207 | 0.486(2) | 0.246(3) | 0.409(3) | 0.066(17) |
| O203 | 0.223(2) | 0.102(3) | 0.579(5) | 0.14(3)   |
| C206 | 0.374(2) | 0.199(3) | 0.436(6) | 0.074(18) |
| O201 | 0.378(3) | 0.224(3) | 0.846(5) | 0.14(2)   |
| C205 | 0.336(4) | 0.193(3) | 0.568(6) | 0.078(19) |
| C104 | 0.693(4) | 0.891(4) | 0.658(6) | 0.10(2)   |
| C204 | 0.328(4) | 0.165(4) | 0.718(6) | 0.09(2)   |
| O202 | 0.264(3) | 0.053(3) | 0.716(4) | 0.12(2)   |
| C103 | 0.630(4) | 0.821(4) | 0.790(6) | 0.10(2)   |
| C203 | 0.369(3) | 0.182(3) | 0.789(5) | 0.072(18) |
| C102 | 0.674(4) | 0.833(4) | 0.720(5) | 0.08(2)   |
| C101 | 0.719(4) | 0.886(4) | 0.576(6) | 0.10(2)   |
| C202 | 0.286(4) | 0.112(4) | 0.589(6) | 0.09(2)   |
| O101 | 0.736(3) | 0.945(4) | 0.716(5) | 0.15(2)   |
| C201 | 0.313(4) | 0.111(4) | 0.666(6) | 0.11(2)   |
| O1X  | 0.445(3) | 0.222(3) | 0.194(5) | 0.14(2)   |
| O2X  | 0.552(3) | 0.775(3) | 0.187(4) | 0.12(2)   |
| O3X  | 0.333333 | 0.666667 | 0.370(7) | 0.102(4)  |

---

Table S6. Bond lengths (Å) for compound **2**.

---

|          |         |           |         |
|----------|---------|-----------|---------|
| W1-O4A   | 1.67(4) | W1-O1A    | 1.85(3) |
| W1-O6A   | 1.87(3) | W1-O5A    | 1.88(3) |
| W1-O6A#4 | 1.89(3) | W1-O12A   | 2.41(3) |
| W2-O4B   | 1.69(3) | W2-O7B    | 1.89(4) |
| W2-O12B  | 1.89(4) | W2-O12B#3 | 1.90(3) |

## Supplementary Information

|           |         |           |         |
|-----------|---------|-----------|---------|
| W2-O11B#3 | 1.97(4) | W2-O2B#3  | 2.46(3) |
| W3-O3A    | 1.65(3) | W3-O9A#1  | 1.87(4) |
| W3-O9A    | 1.92(4) | W3-O10A   | 1.93(4) |
| W3-O11A#4 | 1.97(4) | W3-O13A#4 | 2.48(3) |
| W4-O21B   | 1.66(4) | W4-O8B#2  | 1.85(3) |
| W4-O6B    | 1.87(3) | W4-O5B    | 1.88(3) |
| W4-O8B    | 1.90(3) | W4-O13B   | 2.43(4) |
| W5-O7A    | 1.65(4) | W5-O11A   | 1.82(4) |
| W5-O2A    | 1.88(4) | W5-O5A    | 1.91(3) |
| W5-O8A#1  | 1.94(4) | W5-O13A   | 2.42(3) |
| W6-O21A   | 1.66(4) | W6-O10A   | 1.86(4) |
| W6-O8A    | 1.89(4) | W6-O1A    | 1.94(3) |
| W6-O2A    | 1.93(4) | W6-O13A#4 | 2.45(3) |
| W7-O10B   | 1.65(4) | W7-O7B    | 1.89(4) |
| W7-O5B    | 1.91(3) | W7-O9B#3  | 1.93(4) |
| W7-O3B    | 1.96(3) | W7-O2B#3  | 2.44(3) |
| W8-O10    | 1.70(4) | W8-O16    | 1.84(3) |
| W8-O4     | 1.89(3) | W8-O28    | 1.93(3) |
| W8-O23    | 1.94(4) | W8-O25    | 2.43(3) |
| W9-O31    | 1.71(4) | W9-O20    | 1.91(3) |
| W9-O29    | 1.91(4) | W9-O22    | 1.92(4) |
| W9-O37    | 1.95(4) | W9-O13    | 2.43(4) |
| W10-O22B  | 1.62(4) | W10-O11B  | 1.85(4) |
| W10-O3B   | 1.87(3) | W10-O9B   | 1.88(4) |
| W10-O6B   | 1.91(3) | W10-O2B   | 2.43(3) |
| W11-O1    | 1.70(4) | W11-O48   | 1.89(4) |
| W11-O9    | 1.89(4) | W11-O5    | 1.91(3) |

## Supplementary Information

|          |         |         |         |
|----------|---------|---------|---------|
| W11-O16  | 1.93(3) | W11-O7  | 2.47(3) |
| W12-O24  | 1.68(4) | W12-O19 | 1.83(3) |
| W12-O5   | 1.87(3) | W12-O11 | 1.91(4) |
| W12-O17  | 1.93(3) | W12-O7  | 2.47(3) |
| W13-O18  | 1.64(3) | W13-O17 | 1.87(3) |
| W13-O26  | 1.88(4) | W13-O14 | 1.89(4) |
| W13-O8   | 1.89(4) | W13-O34 | 2.48(4) |
| W14-O301 | 1.70(4) | W14-O27 | 1.91(3) |
| W14-O8   | 1.93(3) | W14-O39 | 1.94(4) |
| W14-O33  | 1.94(4) | W14-O34 | 2.47(4) |
| W15-O36  | 1.70(4) | W15-O6  | 1.90(4) |
| W15-O26  | 1.92(4) | W15-O4  | 1.93(3) |
| W15-O19  | 1.94(3) | W15-O25 | 2.46(3) |
| W16-O40  | 1.67(4) | W16-O39 | 1.86(4) |
| W16-O32  | 1.89(4) | W16-O12 | 1.91(4) |
| W16-O29  | 1.92(4) | W16-O13 | 2.41(4) |
| W17-O38  | 1.63(4) | W17-O37 | 1.85(3) |
| W17-O33  | 1.87(4) | W17-O14 | 1.90(4) |
| W17-O15  | 1.91(4) | W17-O34 | 2.39(4) |
| W18-O21  | 1.68(4) | W18-O15 | 1.89(3) |
| W18-O20  | 1.89(3) | W18-O6  | 1.91(4) |
| W18-O23  | 1.91(3) | W18-O25 | 2.45(4) |
| W19-O35  | 1.67(3) | W19-O28 | 1.86(3) |
| W19-O22  | 1.90(4) | W19-O48 | 1.92(4) |
| W19-O12  | 1.92(4) | W19-O13 | 2.43(4) |
| W20-O30  | 1.65(4) | W20-O27 | 1.89(3) |
| W20-O9   | 1.92(4) | W20-O32 | 1.93(3) |

## Supplementary Information

|           |          |           |           |
|-----------|----------|-----------|-----------|
| W20-O11   | 1.93(3)  | W20-O7    | 2.43(3)   |
| P2-O13A   | 1.49(3)  | P2-O13A#1 | 1.49(3)   |
| P2-O13A#4 | 1.49(3)  | P2-O12A   | 1.59(5)   |
| P3-O2B#2  | 1.49(3)  | P3-O2B#3  | 1.49(3)   |
| P3-O2B    | 1.49(3)  | P3-O13B   | 1.56(6)   |
| P1-O7     | 1.47(3)  | P1-O25    | 1.50(4)   |
| P1-O34    | 1.52(4)  | P1-O13    | 1.57(4)   |
| C209-C208 | 1.32(8)  | C209-C207 | 1.543(15) |
| C109-C108 | 1.36(7)  | C109-C105 | 1.543(15) |
| N101-C108 | 1.22(8)  | N101-C106 | 1.34(9)   |
| N101-C107 | 1.43(9)  | N203-C208 | 1.21(9)   |
| N203-C206 | 1.27(9)  | N203-C205 | 1.37(10)  |
| O205-C205 | 1.42(9)  | O205-C204 | 1.47(9)   |
| O105-C102 | 1.44(9)  | O105-C107 | 1.48(8)   |
| O204-C206 | 1.30(7)  | N102-C105 | 1.21(7)   |
| N202-C207 | 1.31(6)  | O104-C106 | 1.33(9)   |
| C107-C101 | 1.71(10) | O103-C101 | 1.33(9)   |
| N103-C105 | 1.28(8)  | N103-C106 | 1.41(9)   |
| O102-C103 | 1.41(9)  | N201-C206 | 1.31(7)   |
| N201-C207 | 1.53(7)  | O203-C202 | 1.47(9)   |
| O201-C203 | 1.30(9)  | C205-C202 | 1.82(10)  |
| C104-C101 | 1.45(11) | C104-O101 | 1.53(10)  |
| C104-C102 | 1.59(11) | C204-C201 | 1.45(12)  |
| C204-C203 | 1.43(10) | O202-C201 | 1.57(10)  |
| C103-C102 | 1.46(11) | C202-C201 | 1.37(11)  |

---

Table S7. Bond angles (°) for compound **2**.

---

## Supplementary Information

|                  |           |                 |           |
|------------------|-----------|-----------------|-----------|
| O4A-W1-O1A       | 100.8(18) | O4A-W1-O6A      | 105.7(18) |
| O1A-W1-O6A       | 153.5(15) | O4A-W1-O5A      | 100.1(18) |
| O1A-W1-O5A       | 85.2(15)  | O6A-W1-O5A      | 88.5(15)  |
| O4A-W1-O6A#4     | 105.8(18) | O1A-W1-O6A#4    | 86.6(15)  |
| O6A-W1-O6A#4     | 88.(2)    | O5A-W1-O6A#4    | 153.8(15) |
| O4A-W1-O12A      | 174.4(18) | O1A-W1-O12A     | 83.2(12)  |
| O6A-W1-O12A      | 70.5(13)  | O5A-W1-O12A     | 84.1(13)  |
| O6A#4-W1-O12A    | 70.3(13)  | O4B-W2-O7B      | 104.2(16) |
| O4B-W2-O12B      | 102.1(15) | O7B-W2-O12B     | 90.9(16)  |
| O4B-W2-O12B#3    | 101.9(14) | O7B-W2-O12B#3   | 153.9(15) |
| O12B-W2-O12B#3   | 84.(2)    | O4B-W2-O11B#3   | 103.6(15) |
| O7B-W2-O11B#3    | 85.8(15)  | O12B-W2-O11B#3  | 154.2(14) |
| O12B#3-W2-O11B#3 | 87.9(16)  | O4B-W2-O2B#3    | 172.5(13) |
| O7B-W2-O2B#3     | 71.0(14)  | O12B-W2-O2B#3   | 84.0(13)  |
| O12B#3-W2-O2B#3  | 383.0(13) | O11B#3-W2-O2B#3 | 370.7(13) |
| O3A-W3-O9A#1     | 101.0(16) | O3A-W3-O9A      | 103.3(16) |
| O9A#1-W3-O9A     | 82.(3)    | O3A-W3-O10A     | 103.0(15) |
| O9A#1-W3-O10A    | 92.5(17)  | O9A-W3-O10A     | 153.7(14) |
| O3A-W3-O11A#4    | 105.7(15) | O9A#1-W3-O11A#4 | 153.0(14) |
| O9A-W3-O11A#4    | 88.6(16)  | O10A-W3-O11A#4  | 85.3(14)  |
| O3A-W3-O13A#4    | 171.8(14) | O9A#1-W3-O13A#4 | 484.8(14) |
| O9A-W3-O13A#4    | 83.2(13)  | O10A-W3-O13A#4  | 70.7(12)  |
| O11A#4-W3-O13A#4 | 69.1(12)  | O21B-W4-O8B#2   | 108.5(18) |
| O21B-W4-O6B      | 99.9(18)  | O8B#2-W4-O6B    | 90.0(15)  |
| O21B-W4-O5B      | 98.2(17)  | O8B#2-W4-O5B    | 153.3(14) |
| O6B-W4-O5B       | 84.1(14)  | O21B-W4-O8B     | 107.1(18) |
| O8B#2-W4-O8B     | 86.(2)    | O6B-W4-O8B      | 152.5(15) |

## Supplementary Information

|                |           |                |           |
|----------------|-----------|----------------|-----------|
| O5B-W4-O8B     | 87.1(14)  | O21B-W4-O13B   | 177.3(18) |
| O8B#2-W4-O13B  | 71.0(13)  | O6B-W4-O13B    | 82.8(14)  |
| O5B-W4-O13B    | 82.4(13)  | O8B-W4-O13B    | 70.3(13)  |
| O7A-W5-O11A    | 100.9(17) | O7A-W5-O2A     | 103.7(18) |
| O11A-W5-O2A    | 87.4(14)  | O7A-W5-O5A     | 104.6(17) |
| O11A-W5-O5A    | 154.5(15) | O2A-W5-O5A     | 87.4(15)  |
| O7A-W5-O8A#1   | 101.1(17) | O11A-W5-O8A#1  | 86.8(15)  |
| O2A-W5-O8A#1   | 155.1(15) | O5A-W5-O8A#1   | 87.5(15)  |
| O7A-W5-O13A    | 170.6(15) | O11A-W5-O13A   | 72.6(13)  |
| O2A-W5-O13A    | 83.0(13)  | O5A-W5-O13A    | 82.0(13)  |
| O8A#1-W5-O13A  | 72.2(13)  | O21A-W6-O10A   | 101.6(19) |
| O21A-W6-O8A    | 102.8(19) | O10A-W6-O8A    | 85.8(16)  |
| O21A-W6-O1A    | 103.7(18) | O10A-W6-O1A    | 154.5(14) |
| O8A-W6-O1A     | 91.2(15)  | O21A-W6-O2A    | 101.7(19) |
| O10A-W6-O2A    | 86.9(15)  | O8A-W6-O2A     | 155.4(15) |
| O1A-W6-O2A     | 85.4(14)  | O21A-W6-O13A#4 | 172.4(17) |
| O10A-W6-O13A#4 | 72.5(13)  | O8A-W6-O13A#4  | 72.3(13)  |
| O1A-W6-O13A#4  | 82.4(12)  | O2A-W6-O13A#4  | 83.0(13)  |
| O10B-W7-O7B    | 101.5(18) | O10B-W7-O5B    | 104.5(17) |
| O7B-W7-O5B     | 154.0(14) | O10B-W7-O9B#3  | 101.7(18) |
| O7B-W7-O9B#3   | 84.6(16)  | O5B-W7-O9B#3   | 91.6(15)  |
| O10B-W7-O3B    | 103.2(17) | O7B-W7-O3B     | 85.5(15)  |
| O5B-W7-O3B     | 8 7.2(13) | O9B#3-W7-O3B   | 154.6(15) |
| O10B-W7-O2B#3  | 170.3(17) | O7B-W7-O2B#3   | 71.4(14)  |
| O5B-W7-O2B#3   | 83.0(12)  | O9B#3-W7-O2B#3 | 71.6(14)  |
| O3B-W7-O2B#3   | 83.1(12)  | O10-W8-O16     | 105.0(17) |
| O10-W8-O4      | 102.0(17) | O16-W8-O4      | 86.7(15)  |

## Supplementary Information

|              |           |               |           |
|--------------|-----------|---------------|-----------|
| O10-W8-O28   | 103.2(17) | O16-W8-O28    | 84.5(15)  |
| O4-W8-O28    | 154.7(15) | O10-W8-O23    | 101.5(16) |
| O16-W8-O23   | 153.4(15) | O4-W8-O23     | 89.6(15)  |
| O28-W8-O23   | 87.7(15)  | O10-W8-O25    | 171.4(15) |
| O16-W8-O25   | 81.3(14)  | O4-W8-O25     | 72.2(13)  |
| O28-W8-O25   | 83.1(14)  | O23-W8-O25    | 72.5(14)  |
| O31-W9-O20   | 101.4(17) | O31-W9-O29    | 102.9(18) |
| O20-W9-O29   | 155.7(15) | O31-W9-O22    | 101.3(18) |
| O20-W9-O22   | 87.4(16)  | O29-W9-O22    | 87.8(16)  |
| O31-W9-O37   | 103.(2)   | O20-W9-O37    | 84.1(15)  |
| O29-W9-O37   | 90.6(15)  | O22-W9-O37    | 155.8(17) |
| O31-W9-O13   | 171.1(16) | O20-W9-O13    | 84.3(13)  |
| O29-W9-O13   | 71.7(14)  | O22-W9-O13    | 71.9(13)  |
| O37-W9-O13   | 84.7(16)  | O22B-W10-O11B | 100.0(19) |
| O22B-W10-O3B | 101.9(18) | O11B-W10-O3B  | 86.9(15)  |
| O22B-W10-O9B | 101.7(18) | O11B-W10-O9B  | 85.7(16)  |
| O3B-W10-O9B  | 156.1(14) | O22B-W10-O6B  | 105.2(19) |
| O11B-W10-O6B | 154.9(15) | O3B-W10-O6B   | 87.8(14)  |
| O9B-W10-O6B  | 89.4(16)  | O22B-W10-O2B  | 171.0(16) |
| O11B-W10-O2B | 73.1(14)  | O3B-W10-O2B   | 83.6(13)  |
| O9B-W10-O2B  | 72.4(13)  | O6B-W10-O2B   | 81.9(14)  |
| O1-W11-O48   | 102.7(18) | O1-W11-O9     | 102.5(18) |
| O48-W11-O9   | 85.4(15)  | O1-W11-O5     | 103.7(19) |
| O48-W11-O5   | 153.6(16) | O9-W11-O5     | 88.8(15)  |
| O1-W11-O16   | 105.4(18) | O48-W11-O16   | 86.1(15)  |
| O9-W11-O16   | 152.0(14) | O5-W11-O16    | 87.0(15)  |
| O1-W11-O7    | 171.7(15) | O48-W11-O7    | 82.8(13)  |

## Supplementary Information

|              |           |              |           |
|--------------|-----------|--------------|-----------|
| O9-W11-O7    | 71.4(13)  | O5-W11-O7    | 71.0(14)  |
| O16-W11-O7   | 81.1(13)  | O24-W12-O19  | 103.3(18) |
| O24-W12-O5   | 102.6(17) | O19-W12-O5   | 87.3(16)  |
| O24-W12-O11  | 102.7(18) | O19-W12-O11  | 154.0(15) |
| O5-W12-O11   | 87.6(14)  | O24-W12-O17  | 104.0(16) |
| O19-W12-O17  | 85.7(15)  | O5-W12-O17   | 153.4(15) |
| O11-W12-O17  | 87.5(14)  | O24-W12-O7   | 172.3(14) |
| O19-W12-O7   | 81.8(13)  | O5-W12-O7    | 71.6(14)  |
| O11-W12-O7   | 72.4(13)  | O17-W12-O7   | 82.0(12)  |
| O18-W13-O17  | 102.5(16) | O18-W13-O26  | 102.5(16) |
| O17-W13-O26  | 86.3(16)  | O18-W13-O14  | 103.9(17) |
| O17-W13-O14  | 153.6(15) | O26-W13-O14  | 87.2(17)  |
| O18-W13-O8   | 103.6(16) | O17-W13-O8   | 87.3(16)  |
| O26-W13-O8   | 153.9(14) | O14-W13-O8   | 87.3(16)  |
| O18-W13-O34  | 172.8(16) | O17-W13-O34  | 83.8(13)  |
| O26-W13-O34  | 81.3(14)  | O14-W13-O34  | 70.0(14)  |
| O8-W13-O34   | 72.9(13)  | O301-W14-O27 | 101.3(18) |
| O301-W14-O8  | 102.3(17) | O27-W14-O8   | 87.3(15)  |
| O301-W14-O39 | 102.(2)   | O27-W14-O39  | 84.9(16)  |
| O8-W14-O39   | 155.4(17) | O301-W14-O33 | 104.1(18) |
| O27-W14-O33  | 154.6(15) | O8-W14-O33   | 87.0(16)  |
| O39-W14-O33  | 90.1(16)  | O301-W14-O34 | 172.2(16) |
| O27-W14-O34  | 84.6(14)  | O8-W14-O34   | 72.7(13)  |
| O39-W14-O34  | 83.3(17)  | O33-W14-O34  | 70.1(14)  |
| O36-W15-O6   | 102.3(18) | O36-W15-O26  | 105.8(17) |
| O6-W15-O26   | 86.2(16)  | O36-W15-O4   | 101.3(17) |
| O6-W15-O4    | 88.8(15)  | O26-W15-O4   | 152.8(14) |

## Supplementary Information

|             |           |             |           |
|-------------|-----------|-------------|-----------|
| O36-W15-O19 | 105.4(18) | O6-W15-O19  | 152.3(15) |
| O26-W15-O19 | 85.7(15)  | O4-W15-O19  | 86.4(15)  |
| O36-W15-O25 | 170.0(15) | O6-W15-O25  | 72.0(14)  |
| O26-W15-O25 | 82.3(13)  | O4-W15-O25  | 70.8(13)  |
| O19-W15-O25 | 80.7(13)  | O40-W16-O39 | 101.(2)   |
| O40-W16-O32 | 102.1(18) | O39-W16-O32 | 85.5(17)  |
| O40-W16-O12 | 102.6(18) | O39-W16-O12 | 156.6(18) |
| O32-W16-O12 | 88.1(16)  | O40-W16-O29 | 101.0(19) |
| O39-W16-O29 | 89.2(16)  | O32-W16-O29 | 156.8(15) |
| O12-W16-O29 | 87.9(16)  | O40-W16-O13 | 171.4(18) |
| O39-W16-O13 | 84.6(17)  | O32-W16-O13 | 84.9(14)  |
| O12-W16-O13 | 72.5(13)  | O29-W16-O13 | 72.1(14)  |
| O38-W17-O37 | 101.(2)   | O38-W17-O33 | 101.9(19) |
| O37-W17-O33 | 90.4(15)  | O38-W17-O14 | 103.2(19) |
| O37-W17-O14 | 155.5(18) | O33-W17-O14 | 86.3(16)  |
| O38-W17-O15 | 101.8(18) | O37-W17-O15 | 84.1(16)  |
| O33-W17-O15 | 156.3(15) | O14-W17-O15 | 89.3(16)  |
| O38-W17-O34 | 173.1(18) | O37-W17-O34 | 83.7(17)  |
| O33-W17-O34 | 73.0(15)  | O14-W17-O34 | 72.1(14)  |
| O15-W17-O34 | 83.4(14)  | O21-W18-O15 | 101.0(17) |
| O21-W18-O20 | 101.3(17) | O15-W18-O20 | 86.4(16)  |
| O21-W18-O6  | 103.4(17) | O15-W18-O6  | 87.4(16)  |
| O20-W18-O6  | 155.3(15) | O21-W18-O23 | 102.1(18) |
| O15-W18-O23 | 156.8(16) | O20-W18-O23 | 86.5(15)  |
| O6-W18-O23  | 90.0(16)  | O21-W18-O25 | 172.8(15) |
| O15-W18-O25 | 84.7(14)  | O20-W18-O25 | 83.4(13)  |
| O6-W18-O25  | 72.2(13)  | O23-W18-O25 | 72.6(14)  |

## Supplementary Information

|                  |           |                |           |
|------------------|-----------|----------------|-----------|
| O35-W19-O28      | 100.7(17) | O35-W19-O22    | 104.2(17) |
| O28-W19-O22      | 88.6(16)  | O35-W19-O48    | 100.6(16) |
| O28-W19-O48      | 85.3(16)  | O22-W19-O48    | 155.1(14) |
| O35-W19-O12      | 103.4(16) | O28-W19-O12    | 155.7(15) |
| O22-W19-O12      | 88.5(17)  | O48-W19-O12    | 87.2(15)  |
| O35-W19-O13      | 173.9(16) | O28-W19-O13    | 84.3(14)  |
| O22-W19-O13      | 72.2(14)  | O48-W19-O13    | 83.2(13)  |
| O12-W19-O13      | 71.9(13)  | O30-W20-O27    | 101.2(17) |
| O30-W20-O9       | 104.3(17) | O27-W20-O9     | 154.4(15) |
| O30-W20-O32      | 100.2(17) | O27-W20-O32    | 86.8(16)  |
| O9-W20-O32       | 86.3(16)  | O30-W20-O11    | 102.8(17) |
| O27-W20-O11      | 87.5(14)  | O9-W20-O11     | 89.3(15)  |
| O32-W20-O11      | 156.9(16) | O30-W20-O7     | 174.2(15) |
| O27-W20-O7       | 82.9(13)  | O9-W20-O7      | 72.0(13)  |
| O32-W20-O7       | 84.1(13)  | O11-W20-O7     | 73.0(13)  |
| O13A-P2-O13A#1   | 111.6(13) | O13A-P2-O13A#4 | 111.6(13) |
| O13A#1-P2-O13A#4 | 111.6(13) | O13A-P2-O12A   | 107.2(14) |
| O13A#1-P2-O12A   | 107.2(14) | O13A#4-P2-O12A | 107.2(14) |
| O2B#2-P3-O2B#3   | 111.2(14) | O2B#2-P3-O2B   | 111.2(14) |
| O2B#3-P3-O2B     | 111.2(14) | O2B#2-P3-O13B  | 107.7(15) |
| O2B#3-P3-O13B    | 107.7(15) | O2B-P3-O13B    | 107.7(15) |
| O7-P1-O25        | 112.(2)   | O7-P1-O34      | 112.(2)   |
| O25-P1-O34       | 110.(2)   | O7-P1-O13      | 107.9(19) |
| O25-P1-O13       | 109.(2)   | O34-P1-O13     | 106.(2)   |
| W8-O4-W15        | 127.8(18) | W12-O5-W11     | 130.(2)   |
| P2-O13A-W5       | 128.3(18) | P2-O13A-W6#1   | 126.6(18) |
| W5-O13A-W6#1     | 89.0(10)  | P2-O13A-W3#1   | 123.7(19) |

## Supplementary Information

|              |           |                |           |
|--------------|-----------|----------------|-----------|
| W5-O13A-W3#1 | 88.8(10)  | W6#1-O13A-W3#1 | 87.9(10)  |
| P3-O2B-W10   | 127.5(19) | P3-O2B-W7#2    | 126.6(19) |
| W10-O2B-W7#2 | 88.8(11)  | P3-O2B-W2#2    | 124.(2)   |
| W10-O2B-W2#2 | 88.9(11)  | W7#2-O2B-W2#2  | 88.4(11)  |
| W15-O6-W18   | 127.2(19) | P1-O7-W20      | 129.0(19) |
| P1-O7-W12    | 124.9(18) | W20-O7-W12     | 88.7(10)  |
| P1-O7-W11    | 125.6(18) | W20-O7-W11     | 88.3(10)  |
| W12-O7-W11   | 87.6(10)  | W10-O3B-W7     | 147.2(18) |
| W1-O1A-W6    | 153.6(19) | W13-O8-W14     | 127.1(17) |
| W11-O9-W20   | 127.7(19) | W5-O2A-W6      | 149.8(19) |
| W4-O5B-W7    | 153.1(18) | W4-O6B-W10     | 154.1(19) |
| W12-O11-W20  | 126.(2)   | W16-O12-W19    | 125.8(18) |
| P1-O13-W16   | 127.(2)   | P1-O13-W19     | 125.(2)   |
| W16-O13-W19  | 89.6(12)  | P1-O13-W9      | 125.(2)   |
| W16-O13-W9   | 89.7(12)  | W19-O13-W9     | 89.2(12)  |
| W13-O14-W17  | 129.(2)   | W18-O15-W17    | 151.(2)   |
| W1-O5A-W5    | 152.(2)   | W8-O16-W11     | 154.(2)   |
| W1-O6A-W1#1  | 129.(2)   | W13-O17-W12    | 152.(2)   |
| W12-O19-W15  | 154.(2)   | W18-O20-W9     | 151.(2)   |
| W2-O7B-W7    | 129.(2)   | W19-O22-W9     | 126.7(18) |
| W18-O23-W8   | 125.3(19) | P1-O25-W8      | 127.(2)   |
| P1-O25-W18   | 126.(2)   | W8-O25-W18     | 89.2(12)  |
| P1-O25-W15   | 124.7(19) | W8-O25-W15     | 89.0(12)  |
| W18-O25-W15  | 88.4(12)  | W13-O26-W15    | 152.(2)   |
| W4#3-O8B-W4  | 130.0(19) | W20-O27-W14    | 151.(2)   |
| W19-O28-W8   | 153.(2)   | W11-O48-W19    | 151.(2)   |
| W6-O8A-W5#4  | 126.4(18) | W9-O29-W16     | 126.(2)   |

## Supplementary Information

|                |           |                |           |
|----------------|-----------|----------------|-----------|
| W3#4-O9A-W3    | 154.(2)   | W6-O10A-W3     | 128.9(18) |
| W10-O9B-W7#2   | 127.1(19) | W16-O32-W20    | 149.(2)   |
| W17-O33-W14    | 127.(2)   | P1-O34-W17     | 130.(2)   |
| P1-O34-W14     | 125.(2)   | W17-O34-W14    | 89.3(13)  |
| P1-O34-W13     | 123.(2)   | W17-O34-W13    | 88.8(12)  |
| W14-O34-W13    | 87.2(12)  | W5-O11A-W3#1   | 129.3(17) |
| P2-O12A-W1#4   | 125.4(9)  | P2-O12A-W1     | 125.4(9)  |
| W1#4-O12A-W1   | 89.8(13)  | P2-O12A-W1#1   | 125.4(9)  |
| W1#4-O12A-W1#1 | 89.8(13)  | W1-O12A-W1#1   | 89.8(13)  |
| W17-O37-W9     | 1 53.(3)  | W10-O11B-W2#2  | 127.2(19) |
| W2-O12B-W2#2   | 153.(2)   | W16-O39-W14    | 152.(3)   |
| P3-O13B-W4#3   | 126.3(11) | P3-O13B-W4     | 126.3(11) |
| W4#3-O13B-W4   | 88.6(16)  | P3-O13B-W4#2   | 126.3(11) |
| W4#3-O13B-W4#2 | 88.6(16)  | W4-O13B-W4#2   | 88.6(16)  |
| C208-C209-C207 | 109.(5)   | C108-C109-C105 | 109.(5)   |
| C108-N101-C106 | 118.(7)   | C108-N101-C107 | 123.(7)   |
| C106-N101-C107 | 118.(7)   | C208-N203-C206 | 121.(8)   |
| C208-N203-C205 | 124.(8)   | C206-N203-C205 | 114.(8)   |
| C205-O205-C204 | 111.(6)   | C102-O105-C107 | 113.(6)   |
| N101-C108-C109 | 132.(7)   | N101-C107-O105 | 109.(6)   |
| N101-C107-C101 | 117.(6)   | O105-C107-C101 | 107.(6)   |
| N203-C208-C209 | 136.(7)   | C105-N103-C106 | 124.(7)   |
| O104-C106-N101 | 120.(8)   | O104-C106-N103 | 122.(8)   |
| N101-C106-N103 | 118.(7)   | C206-N201-C207 | 123.(6)   |
| N102-C105-N103 | 117.(5)   | N102-C105-C109 | 125.(6)   |
| N103-C105-C109 | 118.(6)   | N202-C207-N201 | 123.(5)   |
| N202-C207-C209 | 126.(5)   | N201-C207-C209 | 111.(4)   |

## Supplementary Information

|                |         |                |         |
|----------------|---------|----------------|---------|
| N203-C206-O204 | 131.(7) | N203-C206-N201 | 119.(7) |
| O204-C206-N201 | 109.(7) | N203-C205-O205 | 116.(7) |
| N203-C205-C202 | 119.(7) | O205-C205-C202 | 100.(6) |
| C101-C104-O101 | 115.(8) | C101-C104-C102 | 114.(8) |
| O101-C104-C102 | 104.(7) | O205-C204-C201 | 106.(7) |
| O205-C204-C203 | 111.(7) | C201-C204-C203 | 120.(8) |
| O102-C103-C102 | 114.(8) | O201-C203-C204 | 124.(7) |
| O105-C102-C103 | 112.(7) | O105-C102-C104 | 99.(6)  |
| C103-C102-C104 | 119.(7) | O103-C101-C104 | 115.(9) |
| O103-C101-C107 | 112.(7) | C104-C101-C107 | 93.(7)  |
| C201-C202-O203 | 126.(8) | C201-C202-C205 | 96.(7)  |
| O203-C202-C205 | 105.(6) | C202-C201-C204 | 110.(9) |
| C202-C201-O202 | 105.(8) | C204-C201-O202 | 109.(8) |

---

Table S8. Anisotropic atomic displacement parameters ( $\text{\AA}^2$ ) for compound 2.

The anisotropic atomic displacement factor exponent takes the form:  $-2\pi^2 [ h^2 a^2 U_{11} + \dots + 2 h k a^* b^* U_{12} ]$

|    | U11        | U22        | U33        | U23         | U13         | U12        |
|----|------------|------------|------------|-------------|-------------|------------|
| W1 | 0.0327(13) | 0.0334(14) | 0.0262(14) | -0.0033(11) | -0.0051(11) | 0.0164(12) |
| W2 | 0.0340(14) | 0.0324(13) | 0.0272(14) | 0.0026(11)  | -0.0003(11) | 0.0191(12) |
| W3 | 0.0345(14) | 0.0325(13) | 0.0265(14) | -0.0035(11) | -0.0005(11) | 0.0200(12) |
| W4 | 0.0330(13) | 0.0363(14) | 0.0266(14) | 0.0031(11)  | 0.0054(11)  | 0.0178(12) |
| W5 | 0.0293(14) | 0.0304(14) | 0.0326(16) | -0.0004(12) | -0.0007(11) | 0.0045(11) |
| W6 | 0.0308(14) | 0.0495(16) | 0.0359(16) | -0.0079(13) | -0.0041(12) | 0.0261(13) |
| W7 | 0.0314(14) | 0.0491(16) | 0.0365(16) | 0.0061(13)  | 0.0050(12)  | 0.0260(13) |
| W8 | 0.0377(15) | 0.0299(14) | 0.0403(17) | 0.0041(12)  | 0.0052(13)  | 0.0127(13) |
| W9 | 0.0399(16) | 0.0285(14) | 0.0391(17) | -0.0037(12) | -0.0061(13) | 0.0112(13) |

## Supplementary Information

|      |            |            |            |             |             |            |
|------|------------|------------|------------|-------------|-------------|------------|
| W10  | 0.0300(14) | 0.0310(14) | 0.0361(16) | 0.0006(12)  | -0.0011(12) | 0.0058(12) |
| W11  | 0.0422(16) | 0.0284(14) | 0.0458(18) | 0.0051(12)  | -0.0030(13) | 0.0168(13) |
| W12  | 0.0382(15) | 0.0300(14) | 0.0411(17) | -0.0040(12) | -0.0046(13) | 0.0131(13) |
| W13  | 0.0410(16) | 0.0241(14) | 0.0458(17) | 0.0005(12)  | 0.0007(13)  | 0.0132(12) |
| W14  | 0.0410(16) | 0.0296(15) | 0.0392(17) | 0.0036(12)  | 0.0044(13)  | 0.0125(13) |
| W15  | 0.0428(16) | 0.0298(15) | 0.0454(18) | -0.0041(12) | 0.0036(13)  | 0.0181(13) |
| W16  | 0.0445(16) | 0.0313(15) | 0.0414(17) | -0.0080(12) | 0.0006(13)  | 0.0177(13) |
| W17  | 0.0456(16) | 0.0303(15) | 0.0421(17) | 0.0071(12)  | -0.0031(13) | 0.0174(13) |
| W18  | 0.0365(15) | 0.0339(15) | 0.0496(18) | 0.0019(13)  | 0.0007(13)  | 0.0183(13) |
| W19  | 0.0396(15) | 0.0219(13) | 0.0475(17) | -0.0001(12) | -0.0011(13) | 0.0113(12) |
| W20  | 0.0366(15) | 0.0317(15) | 0.0519(18) | -0.0014(13) | -0.0008(13) | 0.0172(13) |
| O4   | 0.032(9)   | 0.032(9)   | 0.032(9)   | 0.0001(15)  | -0.0002(15) | 0.016(5)   |
| O5   | 0.04(2)    | 0.02(2)    | 0.05(3)    | -0.007(18)  | 0.02(2)     | 0.009(18)  |
| O13A | 0.025(8)   | 0.025(8)   | 0.025(8)   | 0.0001(15)  | 0.0000(15)  | 0.012(4)   |
| O2B  | 0.031(9)   | 0.031(9)   | 0.031(9)   | -0.0001(15) | 0.0000(15)  | 0.015(4)   |
| O6   | 0.039(9)   | 0.038(9)   | 0.038(9)   | -0.0003(15) | 0.0002(15)  | 0.019(5)   |
| O7   | 0.027(8)   | 0.027(8)   | 0.027(8)   | 0.0001(15)  | 0.0001(15)  | 0.014(4)   |
| O3B  | 0.023(8)   | 0.023(8)   | 0.023(8)   | 0.0000(15)  | 0.0002(15)  | 0.011(4)   |
| O1A  | 0.030(8)   | 0.030(8)   | 0.030(8)   | 0.0000(15)  | 0.0001(15)  | 0.015(4)   |
| O8   | 0.04(2)    | 0.011(19)  | 0.04(2)    | 0.010(17)   | 0.010(19)   | -0.003(17) |
| O9   | 0.04(2)    | 0.02(2)    | 0.05(3)    | 0.004(19)   | -0.03(2)    | 0.012(19)  |
| O2A  | 0.03(2)    | 0.06(3)    | 0.01(2)    | -0.003(19)  | -0.001(17)  | 0.02(2)    |
| O4B  | 0.026(8)   | 0.026(8)   | 0.025(9)   | 0.000(3)    | 0.000(3)    | 0.013(5)   |
| O5B  | 0.026(8)   | 0.026(8)   | 0.026(8)   | 0.0001(15)  | -0.0002(15) | 0.013(4)   |
| O10  | 0.01(2)    | 0.05(3)    | 0.07(3)    | 0.00(2)     | 0.016(19)   | 0.013(19)  |
| O6B  | 0.07(3)    | 0.03(2)    | 0.02(2)    | -0.007(16)  | -0.009(19)  | 0.03(2)    |
| O11  | 0.06(3)    | 0.02(2)    | 0.04(2)    | 0.001(18)   | -0.01(2)    | 0.03(2)    |

## Supplementary Information

|     |           |           |           |             |             |           |
|-----|-----------|-----------|-----------|-------------|-------------|-----------|
| O12 | 0.03(2)   | 0.02(2)   | 0.07(3)   | -0.026(19)  | -0.01(2)    | 0.004(17) |
| O13 | 0.043(10) | 0.043(10) | 0.042(10) | -0.0001(15) | 0.0001(15)  | 0.021(5)  |
| O3A | 0.035(9)  | 0.035(9)  | 0.035(9)  | 0.000(3)    | 0.000(3)    | 0.018(5)  |
| O4A | 0.04(2)   | 0.04(2)   | 0.06(3)   | -0.01(2)    | -0.03(2)    | 0.02(2)   |
| O14 | 0.040(10) | 0.040(10) | 0.040(10) | 0.0000(15)  | 0.0000(15)  | 0.020(5)  |
| O15 | 0.04(2)   | 0.02(2)   | 0.05(3)   | 0.023(19)   | 0.01(2)     | 0.005(18) |
| O5A | 0.05(2)   | 0.03(2)   | 0.02(2)   | 0.003(17)   | 0.005(18)   | 0.013(19) |
| O16 | 0.035(9)  | 0.035(9)  | 0.035(9)  | -0.0001(15) | 0.0000(15)  | 0.017(5)  |
| O6A | 0.039(9)  | 0.039(9)  | 0.039(9)  | -0.0001(15) | 0.0000(15)  | 0.019(5)  |
| O17 | 0.02(2)   | 0.02(2)   | 0.05(2)   | 0.001(18)   | -0.010(18)  | 0.012(17) |
| O18 | 0.04(2)   | 0.014(19) | 0.05(3)   | 0.005(17)   | 0.008(19)   | 0.016(18) |
| O19 | 0.035(9)  | 0.035(9)  | 0.035(9)  | 0.0001(15)  | 0.0001(15)  | 0.018(5)  |
| O20 | 0.033(9)  | 0.033(9)  | 0.033(9)  | -0.0001(15) | 0.0001(15)  | 0.016(5)  |
| O7B | 0.042(10) | 0.042(10) | 0.041(10) | -0.0002(15) | 0.0000(15)  | 0.021(5)  |
| O7A | 0.06(3)   | 0.07(3)   | 0.05(3)   | 0.03(2)     | 0.00(2)     | 0.04(2)   |
| O21 | 0.046(11) | 0.046(11) | 0.046(11) | -0.001(3)   | 0.001(3)    | 0.023(6)  |
| O22 | 0.05(2)   | 0.02(2)   | 0.05(3)   | -0.016(19)  | -0.02(2)    | 0.009(19) |
| O23 | 0.05(3)   | 0.05(2)   | 0.03(2)   | 0.02(2)     | 0.01(2)     | 0.02(2)   |
| O24 | 0.05(3)   | 0.012(19) | 0.07(3)   | 0.00(2)     | -0.01(2)    | 0.010(19) |
| O25 | 0.04(2)   | 0.02(2)   | 0.04(3)   | 0.002(18)   | 0.002(19)   | 0.008(18) |
| O26 | 0.04(2)   | 0.02(2)   | 0.08(3)   | -0.01(2)    | 0.02(2)     | 0.019(19) |
| O8B | 0.033(9)  | 0.033(9)  | 0.033(9)  | -0.0002(15) | 0.0001(15)  | 0.017(5)  |
| O27 | 0.034(9)  | 0.034(9)  | 0.034(9)  | 0.0003(15)  | -0.0003(15) | 0.017(5)  |
| O28 | 0.05(2)   | 0.04(2)   | 0.04(2)   | -0.008(19)  | 0.002(19)   | 0.03(2)   |
| O48 | 0.04(2)   | 0.02(2)   | 0.07(3)   | 0.01(2)     | 0.02(2)     | 0.009(18) |
| O8A | 0.07(3)   | 0.07(3)   | 0.03(2)   | 0.00(2)     | -0.02(2)    | 0.05(2)   |
| O29 | 0.041(9)  | 0.040(9)  | 0.040(10) | -0.0003(15) | 0.0001(15)  | 0.020(5)  |

## Supplementary Information

|      |            |            |           |            |             |            |
|------|------------|------------|-----------|------------|-------------|------------|
| O9A  | 0.04(3)    | 0.07(3)    | 0.03(3)   | -0.02(2)   | 0.01(2)     | 0.02(2)    |
| O10A | 0.05(2)    | 0.06(3)    | 0.04(2)   | 0.02(2)    | 0.03(2)     | 0.04(2)    |
| O9B  | 0.05(2)    | 0.03(2)    | 0.04(3)   | 0.016(19)  | 0.00(2)     | -0.004(19) |
| O30  | 0.07(3)    | 0.04(2)    | 0.05(3)   | 0.00(2)    | -0.03(2)    | 0.03(2)    |
| O31  | 0.07(3)    | 0.07(3)    | 0.05(3)   | -0.02(2)   | -0.02(2)    | 0.04(3)    |
| O32  | 0.05(2)    | 0.04(2)    | 0.03(2)   | -0.017(19) | -0.002(19)  | 0.01(2)    |
| O33  | 0.039(9)   | 0.039(9)   | 0.039(9)  | 0.0000(15) | 0.0001(15)  | 0.019(5)   |
| O34  | 0.048(10)  | 0.048(10)  | 0.048(10) | 0.0000(15) | -0.0001(15) | 0.024(5)   |
| O35  | 0.04(2)    | 0.04(2)    | 0.06(3)   | 0.01(2)    | 0.01(2)     | 0.03(2)    |
| O11A | 0.04(2)    | 0.014(18)  | 0.03(2)   | 0.007(17)  | 0.030(18)   | 0.015(17)  |
| O36  | 0.04(3)    | 0.03(2)    | 0.09(3)   | 0.00(2)    | 0.03(2)     | 0.01(2)    |
| O12A | 0.0130(18) | 0.0130(18) | 0.013(2)  | 0.000000   | 0.000000    | 0.0065(9)  |
| O37  | 0.03(2)    | 0.02(2)    | 0.09(3)   | -0.01(2)   | 0.04(2)     | 0.000(18)  |
| O10B | 0.06(3)    | 0.07(3)    | 0.04(3)   | 0.00(2)    | 0.01(2)     | 0.04(2)    |
| O11B | 0.038(10)  | 0.038(10)  | 0.038(10) | 0.0001(15) | -0.0002(15) | 0.019(5)   |
| O38  | 0.058(12)  | 0.057(12)  | 0.058(12) | 0.001(3)   | -0.001(3)   | 0.029(7)   |
| O12B | 0.07(3)    | 0.06(3)    | 0.02(2)   | -0.020(19) | -0.02(2)    | 0.05(2)    |
| O39  | 0.06(3)    | 0.03(2)    | 0.08(3)   | 0.00(2)    | -0.03(3)    | 0.01(2)    |
| O40  | 0.060(13)  | 0.059(13)  | 0.060(13) | 0.000(3)   | 0.000(3)    | 0.030(7)   |
| O13B | 0.006(18)  | 0.006(18)  | 0.06(4)   | 0.000000   | 0.000000    | 0.003(9)   |
| O21B | 0.054(12)  | 0.054(12)  | 0.054(12) | 0.000(3)   | 0.000(3)    | 0.027(6)   |
| O22B | 0.06(3)    | 0.05(3)    | 0.06(3)   | 0.00(2)    | 0.01(2)     | 0.03(2)    |
| O21A | 0.06(3)    | 0.09(3)    | 0.05(3)   | 0.00(3)    | -0.01(2)    | 0.05(3)    |
| O1   | 0.05(3)    | 0.03(2)    | 0.09(4)   | 0.02(2)    | -0.01(2)    | 0.02(2)    |
| C209 | 0.034(13)  | 0.034(13)  | 0.034(13) | 0.0000(15) | 0.0000(15)  | 0.017(7)   |
| C109 | 0.029(13)  | 0.029(13)  | 0.029(13) | 0.0000(15) | 0.0000(15)  | 0.015(6)   |
| O301 | 0.04(3)    | 0.04(2)    | 0.06(3)   | 0.01(2)    | 0.02(2)     | 0.01(2)    |

## Supplementary Information

|      |           |           |           |             |             |           |
|------|-----------|-----------|-----------|-------------|-------------|-----------|
| N101 | 0.089(18) | 0.089(18) | 0.089(18) | 0.0000(15)  | -0.0001(15) | 0.045(9)  |
| N203 | 0.099(19) | 0.099(19) | 0.099(19) | 0.0000(15)  | 0.0000(15)  | 0.049(10) |
| O205 | 0.10(4)   | 0.10(4)   | 0.10(4)   | 0.02(4)     | -0.01(3)    | 0.07(4)   |
| O105 | 0.12(5)   | 0.08(4)   | 0.13(5)   | -0.03(4)    | -0.01(4)    | 0.09(4)   |
| C108 | 0.044(14) | 0.044(14) | 0.044(14) | -0.0001(15) | 0.0000(15)  | 0.022(7)  |
| O204 | 0.091(17) | 0.092(17) | 0.091(17) | 0.001(3)    | -0.001(3)   | 0.046(9)  |
| N102 | 0.053(15) | 0.053(15) | 0.053(15) | 0.000(3)    | -0.001(3)   | 0.027(8)  |
| N202 | 0.054(14) | 0.054(14) | 0.054(15) | 0.000(3)    | 0.000(3)    | 0.027(8)  |
| O104 | 0.09(4)   | 0.10(4)   | 0.18(6)   | 0.00(4)     | 0.09(4)     | 0.05(4)   |
| C107 | 0.059(16) | 0.059(16) | 0.059(16) | 0.0000(15)  | 0.0000(15)  | 0.030(8)  |
| O103 | 0.04(3)   | 0.12(5)   | 0.19(7)   | 0.03(5)     | 0.02(4)     | 0.01(3)   |
| C208 | 0.049(15) | 0.049(15) | 0.049(15) | 0.0000(15)  | -0.0001(15) | 0.024(8)  |
| N103 | 0.090(18) | 0.090(18) | 0.090(18) | 0.0001(15)  | 0.0000(15)  | 0.045(9)  |
| C106 | 0.077(19) | 0.077(19) | 0.077(19) | 0.0000(15)  | 0.0001(15)  | 0.038(9)  |
| O102 | 0.13(2)   | 0.13(2)   | 0.13(2)   | 0.000(3)    | 0.000(3)    | 0.067(11) |
| N201 | 0.104(19) | 0.104(19) | 0.104(19) | 0.0000(15)  | -0.0001(15) | 0.052(10) |
| C105 | 0.067(17) | 0.066(17) | 0.067(17) | 0.0000(15)  | -0.0001(15) | 0.033(9)  |
| C207 | 0.066(17) | 0.066(17) | 0.066(17) | 0.0000(15)  | 0.0001(15)  | 0.033(9)  |
| O203 | 0.04(3)   | 0.08(4)   | 0.25(8)   | -0.01(5)    | -0.02(4)    | 0.00(3)   |
| C206 | 0.074(18) | 0.074(18) | 0.074(18) | 0.0000(15)  | -0.0001(15) | 0.037(9)  |
| O201 | 0.14(2)   | 0.14(2)   | 0.14(2)   | 0.000(3)    | 0.000(3)    | 0.071(12) |
| C205 | 0.078(19) | 0.078(19) | 0.078(19) | 0.0000(15)  | 0.0000(15)  | 0.039(10) |
| C104 | 0.10(2)   | 0.10(2)   | 0.10(2)   | 0.0000(15)  | 0.0000(15)  | 0.050(11) |
| C204 | 0.09(2)   | 0.09(2)   | 0.09(2)   | 0.0000(15)  | 0.0001(15)  | 0.045(10) |
| O202 | 0.12(2)   | 0.12(2)   | 0.12(2)   | 0.000(3)    | 0.000(3)    | 0.061(10) |
| C103 | 0.10(2)   | 0.10(2)   | 0.10(2)   | 0.0000(15)  | 0.0000(15)  | 0.051(11) |
| C203 | 0.072(18) | 0.072(18) | 0.072(18) | 0.0000(15)  | 0.0000(15)  | 0.036(9)  |

## Supplementary Information

|      |          |          |          |             |             |            |
|------|----------|----------|----------|-------------|-------------|------------|
| C102 | 0.08(2)  | 0.08(2)  | 0.08(2)  | 0.0000(15)  | -0.0001(15) | 0.041(10)  |
| C101 | 0.10(2)  | 0.10(2)  | 0.10(2)  | 0.0000(15)  | 0.0000(15)  | 0.049(11)  |
| C202 | 0.09(2)  | 0.09(2)  | 0.09(2)  | -0.0001(15) | 0.0000(15)  | 0.043(10)  |
| O101 | 0.15(2)  | 0.15(2)  | 0.15(2)  | 0.000(3)    | 0.000(3)    | 0.075(13)  |
| C201 | 0.11(2)  | 0.11(2)  | 0.11(2)  | 0.0000(15)  | 0.0000(15)  | 0.055(11)  |
| O1X  | 0.14(2)  | 0.14(2)  | 0.14(2)  | 0.000(3)    | 0.000(3)    | 0.069(12)  |
| O2X  | 0.12(2)  | 0.12(2)  | 0.12(2)  | 0.000(3)    | 0.000(3)    | 0.058(10)  |
| O3X  | 0.102(4) | 0.102(4) | 0.101(5) | 0.000000    | 0.000000    | 0.0508(18) |

Table S9. Hydrogen atomic coordinates and isotropic atomic displacement parameters ( $\text{\AA}^2$ ) for compound 2.

|      | x/a    | y/b | z/c    | U(eq)   |          |
|------|--------|-----|--------|---------|----------|
| H209 | 0.5277 |     | 0.2608 | 0.5408  | 0.041000 |
| H109 | 0.4729 |     | 0.7356 | -0.4635 | 0.035000 |
| H10C | 0.5664 |     | 0.7844 | -0.3969 | 0.052000 |
| H10D | 0.6915 |     | 0.7909 | -0.4591 | 0.071000 |
| H208 | 0.4374 |     | 0.2231 | 0.6043  | 0.058000 |
| H20D | 0.1987 |     | 0.0656 | 0.5882  | 0.203000 |
| H20E | 0.3112 |     | 0.2078 | 0.5397  | 0.093000 |
| H10G | 0.6567 |     | 0.8931 | -0.3539 | 0.121000 |
| H20F | 0.2890 |     | 0.1582 | 0.7422  | 0.108000 |
| H10H | 0.6438 |     | 0.8581 | -0.1763 | 0.122000 |
| H10I | 0.5912 |     | 0.8105 | -0.2359 | 0.122000 |
| H20A | 0.3577 |     | 0.1449 | 0.8217  | 0.086000 |
| H20B | 0.4091 |     | 0.1940 | 0.7634  | 0.086000 |
| H10J | 0.7109 |     | 0.8356 | -0.2545 | 0.100000 |
| H10K | 0.7126 |     | 0.9098 | -0.4700 | 0.117000 |

## Supplementary Information

|      |        |        |        |          |
|------|--------|--------|--------|----------|
| H20I | 0.2928 | 0.0878 | 0.5452 | 0.103000 |
| H20J | 0.3499 | 0.1084 | 0.6551 | 0.131000 |

---

Table S10. Atomic coordinates and equivalent isotropic atomic displacement parameters ( $\text{\AA}^2$ ) for compound 3.

U(eq) is defined as one third of the trace of the orthogonalized Uij tensor.

|      | x/a         | y/b        | z/c        | U(eq)      |
|------|-------------|------------|------------|------------|
| W001 | 0.44002(9)  | 0.45575(6) | 0.79314(5) | 0.0349(3)  |
| W002 | 0.37883(10) | 0.81362(7) | 0.69584(5) | 0.0373(3)  |
| W003 | 0.57985(10) | 0.51674(6) | 0.69664(7) | 0.0438(3)  |
| W004 | 0.54797(10) | 0.70257(6) | 0.64537(6) | 0.0391(3)  |
| W005 | 0.62046(11) | 0.75814(6) | 0.79004(6) | 0.0448(3)  |
| W006 | 0.65300(10) | 0.57198(6) | 0.84095(7) | 0.0467(4)  |
| W007 | 0.31981(12) | 0.57597(8) | 0.59400(5) | 0.0471(4)  |
| W008 | 0.18069(10) | 0.51452(8) | 0.69049(6) | 0.0477(4)  |
| W009 | 0.15052(10) | 0.68737(9) | 0.64460(6) | 0.0481(4)  |
| W00A | 0.25640(12) | 0.57595(8) | 0.84565(6) | 0.0484(4)  |
| W00B | 0.22893(13) | 0.74897(8) | 0.80057(6) | 0.0558(4)  |
| W00C | 0.46918(15) | 0.69114(7) | 0.89442(5) | 0.0564(4)  |
| P00D | 0.4026(5)   | 0.6343(3)  | 0.7442(2)  | 0.0195(11) |
| O00E | 0.3122(16)  | 0.4680(11) | 0.7308(9)  | 0.040(3)   |
| O00F | 0.2609(16)  | 0.7586(12) | 0.6504(8)  | 0.041(3)   |
| O00G | 0.6052(16)  | 0.6099(11) | 0.6748(11) | 0.045(3)   |
| O00H | 0.313(2)    | 0.8017(12) | 0.7602(9)  | 0.049(3)   |
| O00I | 0.3654(16)  | 0.5082(11) | 0.8384(9)  | 0.038(3)   |
| O00J | 0.5195(16)  | 0.4434(10) | 0.7346(10) | 0.041(3)   |
| O00K | 0.5172(18)  | 0.8285(10) | 0.7520(9)  | 0.045(3)   |

## Supplementary Information

|      |            |            |            |          |
|------|------------|------------|------------|----------|
| O00L | 0.366(2)   | 0.6207(12) | 0.9073(9)  | 0.056(3) |
| O00M | 0.5442(18) | 0.7473(10) | 0.8491(9)  | 0.046(3) |
| O00N | 0.4192(17) | 0.6534(12) | 0.6034(9)  | 0.042(3) |
| O00O | 0.4600(17) | 0.7860(11) | 0.6404(9)  | 0.041(3) |
| O00P | 0.3612(16) | 0.6541(10) | 0.7971(8)  | 0.036(2) |
| O00Q | 0.4411(18) | 0.5210(11) | 0.6394(10) | 0.047(3) |
| O00R | 0.6444(17) | 0.7425(11) | 0.7137(11) | 0.047(3) |
| O00S | 0.1533(19) | 0.7120(14) | 0.7241(10) | 0.054(4) |
| O00T | 0.5646(19) | 0.6186(11) | 0.8842(10) | 0.048(4) |
| O00U | 0.6702(16) | 0.6632(10) | 0.8115(10) | 0.046(4) |
| O00V | 0.2012(18) | 0.6448(13) | 0.5825(9)  | 0.051(3) |
| O00W | 0.4821(15) | 0.5722(10) | 0.7610(9)  | 0.034(2) |
| O00X | 0.2270(19) | 0.5085(14) | 0.6192(9)  | 0.054(4) |
| O00Y | 0.5750(16) | 0.4879(11) | 0.8469(9)  | 0.042(3) |
| O00Z | 0.4595(15) | 0.6984(10) | 0.7271(8)  | 0.034(2) |
| O010 | 0.0843(18) | 0.4506(15) | 0.6807(11) | 0.062(5) |
| O011 | 0.1830(17) | 0.5501(13) | 0.7669(10) | 0.049(4) |
| O012 | 0.4291(18) | 0.3715(11) | 0.8176(10) | 0.048(4) |
| O013 | 0.6824(16) | 0.5330(10) | 0.7724(11) | 0.047(3) |
| O014 | 0.351(2)   | 0.7554(12) | 0.8713(9)  | 0.059(4) |
| O015 | 0.3417(19) | 0.8982(12) | 0.6728(9)  | 0.048(4) |
| O016 | 0.0382(19) | 0.7295(15) | 0.6042(11) | 0.062(5) |
| O017 | 0.184(2)   | 0.6650(14) | 0.8349(10) | 0.059(4) |
| O018 | 0.657(2)   | 0.4680(12) | 0.6624(13) | 0.064(6) |
| O01A | 0.0964(17) | 0.5951(14) | 0.6562(10) | 0.058(4) |
| O01C | 0.729(2)   | 0.8079(12) | 0.8270(12) | 0.065(5) |
| O01E | 0.534(3)   | 0.7178(14) | 0.9651(10) | 0.081(7) |

## Supplementary Information

|      |            |            |            |          |
|------|------------|------------|------------|----------|
| O01F | 0.309(2)   | 0.5473(15) | 0.5240(10) | 0.069(6) |
| O01G | 0.7736(19) | 0.5606(11) | 0.8949(13) | 0.064(6) |
| O01H | 0.185(2)   | 0.5319(16) | 0.8869(12) | 0.073(6) |
| O01I | 0.140(3)   | 0.8098(16) | 0.8143(13) | 0.091(7) |
| O19  | 0.3082(15) | 0.6126(11) | 0.6914(8)  | 0.035(2) |
| O1   | 0.6138(18) | 0.7181(12) | 0.5929(11) | 0.052(5) |
| O1Z  | 0.440(3)   | 0.1912(17) | 0.5550(16) | 0.035(4) |
| C25  | 0.440(3)   | 0.1912(17) | 0.5550(16) | 0.035(4) |
| N1   | 0.763(5)   | 0.206(3)   | 0.496(3)   | 0.025(6) |
| N2   | 0.655(5)   | 0.263(3)   | 0.539(3)   | 0.026(8) |
| N3   | 0.507(4)   | 0.023(3)   | 0.426(2)   | 0.016(5) |
| N4   | 0.480(4)   | 0.112(3)   | 0.485(2)   | 0.016(5) |
| N5   | 0.631(4)   | 0.106(3)   | 0.462(2)   | 0.016(5) |
| C1   | 0.672(6)   | 0.167(3)   | 0.488(3)   | 0.021(8) |
| C2   | 0.604(6)   | 0.201(3)   | 0.518(3)   | 0.024(8) |
| C3   | 0.762(6)   | 0.261(3)   | 0.528(3)   | 0.026(9) |
| C4   | 0.560(5)   | 0.087(3)   | 0.461(3)   | 0.017(6) |
| C5   | 0.497(4)   | 0.181(2)   | 0.517(2)   | 0.038(5) |
| N11  | 0.548(3)   | 0.2243(16) | 0.6737(15) | 0.027(4) |
| N12  | 0.599(5)   | 0.263(3)   | 0.765(3)   | 0.027(4) |
| N13  | 0.577(5)   | 0.979(3)   | 0.731(2)   | 0.021(6) |
| N14  | 0.553(5)   | 0.091(3)   | 0.6944(18) | 0.023(6) |
| N15  | 0.617(5)   | 0.067(3)   | 0.7988(16) | 0.022(5) |
| C11  | 0.563(5)   | 0.165(4)   | 0.707(3)   | 0.020(7) |
| C12  | 0.606(5)   | 0.174(4)   | 0.762(3)   | 0.021(8) |
| C13  | 0.565(6)   | 0.281(4)   | 0.710(4)   | 0.027(9) |
| C14  | 0.577(5)   | 0.063(3)   | 0.728(3)   | 0.019(6) |

## Supplementary Information

|     |          |            |            |           |
|-----|----------|------------|------------|-----------|
| C15 | 0.627(5) | 0.156(3)   | 0.813(3)   | 0.018(5)  |
| N21 | 0.561(5) | 0.352(3)   | 0.587(3)   | 0.022(6)  |
| N22 | 0.418(5) | 0.383(3)   | 0.527(3)   | 0.023(6)  |
| N23 | 0.485(5) | 0.104(3)   | 0.584(3)   | 0.033(9)  |
| N24 | 0.361(6) | 0.193(3)   | 0.533(3)   | 0.029(6)  |
| N25 | 0.533(3) | 0.2248(19) | 0.5993(16) | 0.045(6)  |
| C21 | 0.506(7) | 0.289(4)   | 0.583(3)   | 0.030(9)  |
| C23 | 0.522(6) | 0.395(4)   | 0.563(3)   | 0.024(6)  |
| O1X | 0.652(6) | 0.325(4)   | 0.902(3)   | 0.21(2)   |
| O2X | 0.338(5) | 0.448(3)   | 0.429(3)   | 0.19(2)   |
| O11 | 0.661(4) | 0.153(2)   | 0.862(2)   | 0.020(6)  |
| C22 | 0.408(6) | 0.307(4)   | 0.537(3)   | 0.024(5)  |
| C24 | 0.320(6) | 0.262(4)   | 0.515(4)   | 0.029(5)  |
| O21 | 0.236(4) | 0.268(2)   | 0.486(2)   | 0.026(10) |
| C1A | 0.519(6) | 0.125(3)   | 0.072(3)   | 0.070(11) |
| C2A | 0.516(3) | 0.0278(17) | 0.0062(17) | 0.065(7)  |
| C3A | 0.574(5) | 0.085(3)   | 0.997(3)   | 0.046(7)  |
| O1A | 0.574(5) | 0.085(3)   | 0.997(3)   | 0.046(7)  |
| C4A | 0.404(6) | 0.005(2)   | 0.069(3)   | 0.078(11) |
| N1B | 0.874(4) | 0.113(2)   | 0.4363(19) | 0.029(6)  |
| N2B | 0.866(3) | 0.011(3)   | 0.492(2)   | 0.052(8)  |
| N3B | 0.055(4) | 0.083(3)   | 0.455(2)   | 0.046(8)  |
| N4B | 0.257(3) | 0.0607(18) | 0.4790(15) | 0.013(6)  |
| C1B | 0.981(3) | 0.091(2)   | 0.4561(19) | 0.039(5)  |
| O1B | 0.981(3) | 0.091(2)   | 0.4561(19) | 0.039(5)  |
| C2B | 0.975(3) | 0.0240(19) | 0.4865(15) | 0.060(7)  |
| C3B | 0.798(3) | 0.080(3)   | 0.458(2)   | 0.039(7)  |

## Supplementary Information

|     |          |          |          |           |
|-----|----------|----------|----------|-----------|
| C4B | 0.150(4) | 0.046(3) | 0.482(2) | 0.034(10) |
| N1A | 0.584(4) | 0.134(3) | 0.028(2) | 0.046(8)  |
| N2A | 0.474(4) | 0.057(3) | 0.052(2) | 0.077(10) |
| N3A | 0.354(5) | 0.017(3) | 0.115(3) | 0.081(13) |
| N4A | 0.403(4) | 0.937(2) | 0.041(3) | 0.076(13) |

---

Table S11. Bond lengths (Å) for compound **3**.

---

|           |           |           |           |
|-----------|-----------|-----------|-----------|
| W001-O012 | 1.71(2)   | W001-O00I | 1.877(19) |
| W001-O00E | 1.88(2)   | W001-O00J | 1.92(2)   |
| W001-O00Y | 1.93(2)   | W001-O00W | 2.43(2)   |
| W002-O015 | 1.71(2)   | W002-O00H | 1.92(2)   |
| W002-O00K | 1.91(2)   | W002-O00F | 1.89(2)   |
| W002-O00O | 1.93(2)   | W002-O00Z | 2.432(18) |
| W003-O018 | 1.69(2)   | W003-O00J | 1.91(2)   |
| W003-O00G | 1.88(2)   | W003-O00Q | 1.90(2)   |
| W003-O013 | 1.92(2)   | W003-O00W | 2.427(18) |
| W004-O1   | 1.68(2)   | W004-O00O | 1.91(2)   |
| W004-O00N | 1.90(2)   | W004-O00R | 1.89(2)   |
| W004-O00G | 1.95(2)   | W004-O00Z | 2.46(2)   |
| W005-O01C | 1.70(2)   | W005-O00R | 1.91(2)   |
| W005-O00U | 1.923(19) | W005-O00K | 1.91(2)   |
| W005-O00M | 1.89(2)   | W005-O00Z | 2.446(19) |
| W006-O01G | 1.71(2)   | W006-O013 | 1.89(2)   |
| W006-O00Y | 1.90(2)   | W006-O00U | 1.89(2)   |
| W006-O00T | 1.91(2)   | W006-O00W | 2.451(19) |
| W007-O01F | 1.69(2)   | W007-O00Q | 1.92(2)   |
| W007-O00N | 1.90(2)   | W007-O00X | 1.93(2)   |

## Supplementary Information

|           |           |           |           |
|-----------|-----------|-----------|-----------|
| W007-O00V | 1.95(3)   | W007-O19  | 2.421(18) |
| W008-O010 | 1.69(2)   | W008-O00E | 1.90(2)   |
| W008-O011 | 1.90(2)   | W008-O00X | 1.91(2)   |
| W008-O01A | 1.91(2)   | W008-O19  | 2.45(2)   |
| W009-O016 | 1.68(2)   | W009-O00V | 1.91(2)   |
| W009-O01A | 1.92(2)   | W009-O00F | 1.92(2)   |
| W009-O00S | 1.91(2)   | W009-O19  | 2.452(19) |
| W00A-O01H | 1.71(2)   | W00A-O011 | 1.89(2)   |
| W00A-O017 | 1.90(2)   | W00A-O00I | 1.922(19) |
| W00A-O00L | 1.91(3)   | W00A-O00P | 2.46(2)   |
| W00B-O01I | 1.70(2)   | W00B-O00S | 1.92(3)   |
| W00B-O017 | 1.93(3)   | W00B-O00H | 1.88(2)   |
| W00B-O014 | 1.94(3)   | W00B-O00P | 2.469(17) |
| W00C-O01E | 1.71(2)   | W00C-O014 | 1.89(2)   |
| W00C-O00T | 1.88(2)   | W00C-O00M | 1.92(3)   |
| W00C-O00L | 1.94(3)   | W00C-O00P | 2.422(19) |
| P00D-O00P | 1.513(18) | P00D-O00W | 1.526(18) |
| P00D-O00Z | 1.52(2)   | P00D-O19  | 1.527(19) |
| O1Z-N24   | 1.00(7)   | O1Z-C5    | 1.29(5)   |
| O1Z-N25   | 1.49(5)   | O1Z-N23   | 1.81(7)   |
| N1-C1     | 1.34(9)   | N1-C3     | 1.28(9)   |
| N2-C2     | 1.36(9)   | N2-C3     | 1.44(10)  |
| N3-C4     | 1.52(8)   | N4-C4     | 1.36(8)   |
| N4-C5     | 1.49(6)   | N5-C4     | 0.97(8)   |
| N5-C1     | 1.33(8)   | C1-C2     | 1.41(10)  |
| C2-C5     | 1.40(8)   | C5-N24    | 1.87(8)   |
| N11-C11   | 1.35(7)   | N11-C13   | 1.35(8)   |

## Supplementary Information

|           |           |           |           |
|-----------|-----------|-----------|-----------|
| N11-N25   | 1.70(5)   | N12-C13   | 1.29(10)  |
| N12-C12   | 1.68(9)   | N13-C14   | 1.58(8)   |
| N14-C14   | 0.93(7)   | N14-C11   | 1.43(8)   |
| N15-C14   | 1.61(7)   | N15-C15   | 1.70(8)   |
| C11-C12   | 1.27(10)  | C12-C15   | 1.19(10)  |
| C15-O11   | 1.12(8)   | N21-C21   | 1.36(9)   |
| N21-C23   | 1.03(9)   | N22-C23   | 1.37(9)   |
| N22-C22   | 1.45(9)   | N24-C24   | 1.41(10)  |
| N25-C21   | 1.29(8)   | C21-C22   | 1.45(10)  |
| C22-C24   | 1.39(10)  | C24-O21   | 1.11(9)   |
| C1A-N2A   | 1.437(10) | C1A-N1A   | 1.50(8)   |
| C1A-C2A   | 2.400(10) | C2A-C2A#1 | 1.13(7)   |
| C2A-N2A   | 1.435(10) | C2A-C3A   | 1.36(8)   |
| C3A-N4A#1 | 1.06(8)   | C3A-N1A   | 1.17(8)   |
| C4A-N3A   | 1.40(4)   | C4A-N2A   | 1.442(10) |
| C4A-N4A   | 1.443(10) | N1B-C3B   | 1.35(7)   |
| N1B-C1B   | 1.38(6)   | N2B-C2B   | 1.439(6)  |
| N2B-C3B   | 1.64(6)   | N2B-C4B#2 | 1.28(7)   |
| N2B-C1B   | 2.395(10) | N3B-C1B   | 0.96(6)   |
| N3B-C4B   | 1.38(7)   | N4B-C4B   | 1.41(6)   |
| C1B-C2B   | 1.46(4)   | C1B-C3B   | 2.33(5)   |
| C2B-C2B#2 | 1.19(6)   | C2B-C4B#2 | 2.32(7)   |
| C2B-C3B   | 2.395(10) |           |           |

Table S12. Bond angles (°) for compound 3.

---

|                |           |                |           |
|----------------|-----------|----------------|-----------|
| O012-W001-O00I | 101.9(10) | O012-W001-O00E | 104.2(10) |
| O00I-W001-O00E | 85.0(8)   | O012-W001-O00J | 103.3(10) |

## Supplementary Information

|                |           |                |           |
|----------------|-----------|----------------|-----------|
| O00I-W001-O00J | 154.8(9)  | O00E-W001-O00J | 88.3(9)   |
| O012-W001-O00Y | 102.2(10) | O00I-W001-O00Y | 87.7(9)   |
| O00E-W001-O00Y | 153.5(9)  | O00J-W001-O00Y | 87.7(9)   |
| O012-W001-O00W | 172.2(9)  | O00I-W001-O00W | 83.1(8)   |
| O00E-W001-O00W | 82.1(8)   | O00J-W001-O00W | 71.9(7)   |
| O00Y-W001-O00W | 71.8(8)   | O015-W002-O00H | 102.5(9)  |
| O015-W002-O00K | 101.7(10) | O00H-W002-O00K | 89.4(10)  |
| O015-W002-O00F | 103.2(10) | O00H-W002-O00F | 86.2(9)   |
| O00K-W002-O00F | 155.1(8)  | O015-W002-O00O | 101.1(9)  |
| O00H-W002-O00O | 156.4(9)  | O00K-W002-O00O | 86.9(9)   |
| O00F-W002-O00O | 87.5(9)   | O015-W002-O00Z | 171.1(9)  |
| O00H-W002-O00Z | 83.9(8)   | O00K-W002-O00Z | 72.0(7)   |
| O00F-W002-O00Z | 83.2(8)   | O00O-W002-O00Z | 72.7(8)   |
| O018-W003-O00J | 100.3(10) | O018-W003-O00G | 102.7(10) |
| O00J-W003-O00G | 157.1(8)  | O018-W003-O00Q | 103.5(12) |
| O00J-W003-O00Q | 87.0(9)   | O00G-W003-O00Q | 87.9(9)   |
| O018-W003-O013 | 100.9(12) | O00J-W003-O013 | 86.8(9)   |
| O00G-W003-O013 | 88.7(9)   | O00Q-W003-O013 | 155.5(8)  |
| O018-W003-O00W | 169.5(11) | O00J-W003-O00W | 72.1(7)   |
| O00G-W003-O00W | 85.2(8)   | O00Q-W003-O00W | 83.6(7)   |
| O013-W003-O00W | 71.9(7)   | O1-W004-O00O   | 101.9(10) |
| O1-W004-O00N   | 103.4(10) | O00O-W004-O00N | 88.1(9)   |
| O1-W004-O00R   | 102.3(11) | O00O-W004-O00R | 87.5(9)   |
| O00N-W004-O00R | 154.3(9)  | O1-W004-O00G   | 101.8(10) |
| O00O-W004-O00G | 156.3(9)  | O00N-W004-O00G | 86.0(9)   |
| O00R-W004-O00G | 88.0(9)   | O1-W004-O00Z   | 171.3(9)  |
| O00O-W004-O00Z | 72.2(8)   | O00N-W004-O00Z | 83.1(7)   |

## Supplementary Information

|                |           |                |           |
|----------------|-----------|----------------|-----------|
| O00R-W004-O00Z | 71.4(8)   | O00G-W004-O00Z | 84.3(8)   |
| O01C-W005-O00R | 104.5(12) | O01C-W005-O00U | 102.6(10) |
| O00R-W005-O00U | 88.7(10)  | O01C-W005-O00K | 102.3(10) |
| O00R-W005-O00K | 86.1(9)   | O00U-W005-O00K | 155.1(9)  |
| O01C-W005-O00M | 101.1(12) | O00R-W005-O00M | 154.4(9)  |
| O00U-W005-O00M | 84.5(9)   | O00K-W005-O00M | 89.7(9)   |
| O01C-W005-O00Z | 172.6(10) | O00R-W005-O00Z | 71.5(8)   |
| O00U-W005-O00Z | 83.6(7)   | O00K-W005-O00Z | 71.6(8)   |
| O00M-W005-O00Z | 83.3(8)   | O01G-W006-O013 | 103.7(12) |
| O01G-W006-O00Y | 102.7(10) | O013-W006-O00Y | 87.7(9)   |
| O01G-W006-O00U | 102.5(10) | O013-W006-O00U | 88.8(10)  |
| O00Y-W006-O00U | 154.7(8)  | O01G-W006-O00T | 101.7(11) |
| O013-W006-O00T | 154.7(9)  | O00Y-W006-O00T | 87.6(9)   |
| O00U-W006-O00T | 85.0(10)  | O01G-W006-O00W | 172.7(8)  |
| O013-W006-O00W | 71.8(8)   | O00Y-W006-O00W | 71.7(8)   |
| O00U-W006-O00W | 83.4(7)   | O00T-W006-O00W | 83.1(7)   |
| O01F-W007-O00Q | 101.8(13) | O01F-W007-O00N | 103.6(10) |
| O00Q-W007-O00N | 86.9(9)   | O01F-W007-O00X | 100.8(11) |
| O00Q-W007-O00X | 86.4(10)  | O00N-W007-O00X | 155.5(9)  |
| O01F-W007-O00V | 102.8(13) | O00Q-W007-O00V | 155.4(9)  |
| O00N-W007-O00V | 88.0(9)   | O00X-W007-O00V | 88.5(10)  |
| O01F-W007-O19  | 172.1(10) | O00Q-W007-O19  | 82.8(7)   |
| O00N-W007-O19  | 82.9(7)   | O00X-W007-O19  | 72.9(8)   |
| O00V-W007-O19  | 72.6(8)   | O010-W008-O00E | 104.1(11) |
| O010-W008-O011 | 102.1(12) | O00E-W008-O011 | 84.6(9)   |
| O010-W008-O00X | 102.6(11) | O00E-W008-O00X | 88.4(10)  |
| O011-W008-O00X | 155.3(10) | O010-W008-O01A | 102.1(11) |

## Supplementary Information

|                |           |                |           |
|----------------|-----------|----------------|-----------|
| O00E-W008-O01A | 153.7(9)  | O011-W008-O01A | 88.8(10)  |
| O00X-W008-O01A | 87.1(11)  | O010-W008-O19  | 172.4(9)  |
| O00E-W008-O19  | 81.8(8)   | O011-W008-O19  | 83.1(8)   |
| O00X-W008-O19  | 72.4(8)   | O01A-W008-O19  | 72.2(8)   |
| O016-W009-O00V | 100.2(12) | O016-W009-O01A | 103.2(11) |
| O00V-W009-O01A | 86.0(10)  | O016-W009-O00F | 101.4(11) |
| O00V-W009-O00F | 87.9(9)   | O01A-W009-O00F | 155.2(9)  |
| O016-W009-O00S | 102.9(12) | O00V-W009-O00S | 156.8(9)  |
| O01A-W009-O00S | 89.9(11)  | O00F-W009-O00S | 86.3(10)  |
| O016-W009-O19  | 171.3(11) | O00V-W009-O19  | 72.4(8)   |
| O01A-W009-O19  | 72.1(8)   | O00F-W009-O19  | 83.2(8)   |
| O00S-W009-O19  | 84.6(8)   | O01H-W00A-O011 | 103.1(13) |
| O01H-W00A-O017 | 101.3(11) | O011-W00A-O017 | 90.3(10)  |
| O01H-W00A-O00I | 103.2(11) | O011-W00A-O00I | 85.4(9)   |
| O017-W00A-O00I | 155.5(10) | O01H-W00A-O00L | 100.4(13) |
| O011-W00A-O00L | 156.5(10) | O017-W00A-O00L | 86.3(10)  |
| O00I-W00A-O00L | 88.1(8)   | O01H-W00A-O00P | 171.3(12) |
| O011-W00A-O00P | 83.7(8)   | O017-W00A-O00P | 73.0(8)   |
| O00I-W00A-O00P | 82.6(8)   | O00L-W00A-O00P | 73.0(9)   |
| O01I-W00B-O00S | 103.4(14) | O01I-W00B-O017 | 101.2(13) |
| O00S-W00B-O017 | 87.6(11)  | O01I-W00B-O00H | 103.1(13) |
| O00S-W00B-O00H | 86.3(10)  | O017-W00B-O00H | 155.6(9)  |
| O01I-W00B-O014 | 102.2(14) | O00S-W00B-O014 | 154.4(9)  |
| O017-W00B-O014 | 87.3(11)  | O00H-W00B-O014 | 88.0(11)  |
| O01I-W00B-O00P | 170.8(10) | O00S-W00B-O00P | 83.1(8)   |
| O017-W00B-O00P | 72.2(8)   | O00H-W00B-O00P | 83.6(8)   |
| O014-W00B-O00P | 71.5(8)   | O01E-W00C-O014 | 103.0(11) |

## Supplementary Information

|                |           |                |           |
|----------------|-----------|----------------|-----------|
| O01E-W00C-O00T | 100.3(11) | O014-W00C-O00T | 156.4(9)  |
| O01E-W00C-O00M | 101.0(13) | O014-W00C-O00M | 87.6(10)  |
| O00T-W00C-O00M | 84.5(9)   | O01E-W00C-O00L | 102.7(14) |
| O014-W00C-O00L | 88.3(11)  | O00T-W00C-O00L | 90.1(9)   |
| O00M-W00C-O00L | 156.3(8)  | O01E-W00C-O00P | 174.5(13) |
| O014-W00C-O00P | 73.3(8)   | O00T-W00C-O00P | 83.7(7)   |
| O00M-W00C-O00P | 83.1(7)   | O00L-W00C-O00P | 73.3(8)   |
| O00P-P00D-O00W | 109.1(11) | O00P-P00D-O00Z | 108.0(11) |
| O00W-P00D-O00Z | 110.8(11) | O00P-P00D-O19  | 111.0(11) |
| O00W-P00D-O19  | 108.8(11) | O00Z-P00D-O19  | 109.1(11) |
| W008-O00E-W001 | 154.4(12) | W002-O00F-W009 | 151.0(11) |
| W003-O00G-W004 | 149.4(11) | W002-O00H-W00B | 151.2(13) |
| W001-O00I-W00A | 151.9(11) | W003-O00J-W001 | 126.5(10) |
| W002-O00K-W005 | 127.3(10) | W00C-O00L-W00A | 124.7(11) |
| W00C-O00M-W005 | 152.2(10) | W004-O00N-W007 | 152.0(13) |
| W004-O00O-W002 | 126.1(11) | P00D-O00P-W00C | 127.3(11) |
| P00D-O00P-W00B | 126.4(11) | W00C-O00P-W00B | 88.7(6)   |
| P00D-O00P-W00A | 125.2(11) | W00C-O00P-W00A | 88.8(6)   |
| W00B-O00P-W00A | 88.1(6)   | W007-O00Q-W003 | 149.6(11) |
| W005-O00R-W004 | 128.6(12) | W00B-O00S-W009 | 150.5(13) |
| W00C-O00T-W006 | 152.7(13) | W005-O00U-W006 | 152.2(13) |
| W009-O00V-W007 | 125.2(11) | P00D-O00W-W001 | 126.3(11) |
| P00D-O00W-W003 | 125.6(11) | W001-O00W-W003 | 89.4(6)   |
| P00D-O00W-W006 | 125.8(10) | W001-O00W-W006 | 89.1(6)   |
| W003-O00W-W006 | 88.8(6)   | W008-O00X-W007 | 125.5(12) |
| W006-O00Y-W001 | 127.2(11) | P00D-O00Z-W005 | 126.1(10) |
| P00D-O00Z-W002 | 127.2(11) | W005-O00Z-W002 | 89.1(6)   |

## Supplementary Information

|                |           |                |           |
|----------------|-----------|----------------|-----------|
| P00D-O00Z-W004 | 125.1(10) | W005-O00Z-W004 | 88.4(6)   |
| W002-O00Z-W004 | 88.8(6)   | W008-O011-W00A | 152.4(12) |
| W006-O013-W003 | 127.4(10) | W00C-O014-W00B | 126.3(12) |
| W00A-O017-W00B | 126.7(12) | W009-O01A-W008 | 127.1(11) |
| P00D-O19-W007  | 127.2(10) | P00D-O19-W008  | 125.6(11) |
| W007-O19-W008  | 88.9(6)   | P00D-O19-W009  | 125.0(11) |
| W007-O19-W009  | 89.5(6)   | W008-O19-W009  | 88.6(6)   |
| N24-O1Z-C5     | 108.(5)   | N24-O1Z-N25    | 147.(5)   |
| C5-O1Z-N25     | 93.(3)    | N24-O1Z-N23    | 114.(5)   |
| C5-O1Z-N23     | 87.(3)    | N25-O1Z-N23    | 91.(3)    |
| C1-N1-C3       | 112.(6)   | C2-N2-C3       | 106.(6)   |
| C4-N4-C5       | 119.(5)   | C4-N5-C1       | 125.(7)   |
| N1-C1-C2       | 107.(6)   | N1-C1-N5       | 139.(7)   |
| C2-C1-N5       | 114.(6)   | C1-C2-C5       | 126.(6)   |
| C1-C2-N2       | 106.(6)   | C5-C2-N2       | 127.(6)   |
| N1-C3-N2       | 107.(6)   | N5-C4-N4       | 131.(7)   |
| N5-C4-N3       | 125.(7)   | N4-C4-N3       | 104.(5)   |
| O1Z-C5-C2      | 132.(5)   | O1Z-C5-N4      | 116.(4)   |
| C2-C5-N4       | 104.(4)   | O1Z-C5-N24     | 31.(3)    |
| C2-C5-N24      | 155.(4)   | N4-C5-N24      | 101.(4)   |
| C11-N11-C13    | 108.(5)   | C11-N11-N25    | 124.(4)   |
| C13-N11-N25    | 127.(4)   | C13-N12-C12    | 103.(6)   |
| C14-N14-C11    | 113.(7)   | C14-N15-C15    | 104.(4)   |
| N11-C11-C12    | 116.(6)   | N11-C11-N14    | 134.(6)   |
| C12-C11-N14    | 109.(6)   | C15-C12-C11    | 153.(8)   |
| C15-C12-N12    | 104.(6)   | C11-C12-N12    | 99.(6)    |
| N12-C13-N11    | 112.(6)   | N14-C14-N15    | 141.(7)   |

## Supplementary Information

|               |          |               |          |
|---------------|----------|---------------|----------|
| N14-C14-N13   | 128.(7)  | N15-C14-N13   | 90.(4)   |
| O11-C15-C12   | 163.(8)  | O11-C15-N15   | 99.(5)   |
| C12-C15-N15   | 96.(5)   | C21-N21-C23   | 119.(7)  |
| C23-N22-C22   | 100.(6)  | O1Z-N24-C24   | 115.(7)  |
| O1Z-N24-C5    | 41.(4)   | C24-N24-C5    | 110.(5)  |
| C21-N25-N11   | 105.(4)  | C21-N25-O1Z   | 96.(4)   |
| N11-N25-O1Z   | 124.(3)  | N21-C21-C22   | 100.(6)  |
| N21-C21-N25   | 135.(7)  | C22-C21-N25   | 123.(7)  |
| N22-C23-N21   | 116.(7)  | C24-C22-C21   | 125.(7)  |
| C24-C22-N22   | 130.(7)  | C21-C22-N22   | 105.(6)  |
| O21-C24-C22   | 135.(8)  | O21-C24-N24   | 119.(7)  |
| C22-C24-N24   | 105.(7)  | N2A-C1A-N1A   | 97.(3)   |
| N2A-C1A-C2A   | 33.3(6)  | N1A-C1A-C2A   | 63.(3)   |
| C2A#1-C2A-N2A | 112.(5)  | C2A#1-C2A-C3A | 150.(6)  |
| N2A-C2A-C3A   | 98.(4)   | C2A#1-C2A-C1A | 145.(5)  |
| N2A-C2A-C1A   | 33.3(6)  | C3A-C2A-C1A   | 65.(4)   |
| N4A#1-C3A-C2A | 96.(5)   | N4A#1-C3A-N1A | 144.(8)  |
| C2A-C3A-N1A   | 120.(7)  | N3A-C4A-N2A   | 122.(3)  |
| N3A-C4A-N4A   | 123.(3)  | N2A-C4A-N4A   | 115.(5)  |
| C3B-N1B-C1B   | 117.(4)  | C2B-N2B-C3B   | 102.(3)  |
| C2B-N2B-C4B#2 | 117.(5)  | C3B-N2B-C4B#2 | 141.(4)  |
| C2B-N2B-C1B   | 34.5(19) | C3B-N2B-C1B   | 68.(2)   |
| C4B#2-N2B-C1B | 152.(4)  | C1B-N3B-C4B   | 144.(7)  |
| N3B-C1B-C2B   | 93.(5)   | N3B-C1B-N1B   | 158.(6)  |
| C2B-C1B-N1B   | 105.(3)  | N3B-C1B-N2B   | 127.(5)  |
| C2B-C1B-N2B   | 33.9(8)  | N1B-C1B-N2B   | 71.(3)   |
| N3B-C1B-C3B   | 166.(5)  | C2B-C1B-C3B   | 74.5(16) |

## Supplementary Information

|               |          |                 |           |
|---------------|----------|-----------------|-----------|
| N1B-C1B-C3B   | 31.(2)   | N2B-C1B-C3B     | 40.5(18)  |
| N2B-C2B-C1B   | 112.(3)  | N2B-C2B-C2B#2   | 103.(5)   |
| C1B-C2B-C2B#2 | 146.(4)  | N2B-C2B-C4B#2   | 29.(3)    |
| C1B-C2B-C4B#2 | 141.(3)  | C2B#2-C2B-C4B#2 | 73.(4)    |
| N2B-C2B-C3B   | 42.(2)   | C1B-C2B-C3B     | 70.(2)    |
| C2B#2-C2B-C3B | 144.(4)  | C4B#2-C2B-C3B   | 71.(2)    |
| N1B-C3B-N2B   | 103.(2)  | N1B-C3B-C1B     | 32.(2)    |
| N2B-C3B-C1B   | 71.9(13) | N1B-C3B-C2B     | 67.(2)    |
| N2B-C3B-C2B   | 36.0(5)  | C1B-C3B-C2B     | 35.9(13)  |
| N3B-C4B-N4B   | 128.(6)  | N3B-C4B-N2B#2   | 114.(5)   |
| N4B-C4B-N2B#2 | 117.(5)  | N3B-C4B-C2B#2   | 81.(4)    |
| N4B-C4B-C2B#2 | 151.(4)  | N2B#2-C4B-C2B#2 | 33.(2)    |
| C3A-N1A-C1A   | 111.(6)  | C1A-N2A-C2A     | 113.4(11) |
| C1A-N2A-C4A   | 138.(5)  | C2A-N2A-C4A     | 108.(4)   |
| C3A#1-N4A-C4A | 138.(6)  |                 |           |

---

Table S13. Anisotropic atomic displacement parameters ( $\text{\AA}^2$ ) for compound **3**.

The anisotropic atomic displacement factor exponent takes the form:  $-2\pi^2[ h^2 a^2 U_{11} + \dots + 2 h k a^* b^* U_{12} ]$

|      | U11       | U22       | U33       | U23        | U13        | U12        |
|------|-----------|-----------|-----------|------------|------------|------------|
| W001 | 0.0320(6) | 0.0351(6) | 0.0362(6) | -0.0104(5) | 0.0066(5)  | 0.0009(5)  |
| W002 | 0.0386(6) | 0.0398(6) | 0.0310(6) | -0.0013(5) | 0.0048(5)  | 0.0126(5)  |
| W003 | 0.0415(7) | 0.0292(6) | 0.0691(9) | -0.0206(6) | 0.0294(6)  | -0.0071(5) |
| W004 | 0.0347(6) | 0.0323(6) | 0.0544(8) | -0.0127(5) | 0.0188(6)  | -0.0044(5) |
| W005 | 0.0410(7) | 0.0261(6) | 0.0533(8) | -0.0123(5) | -0.0113(6) | 0.0053(5)  |
| W006 | 0.0345(6) | 0.0254(6) | 0.0647(9) | -0.0123(6) | -0.0136(6) | 0.0074(5)  |
| W007 | 0.0534(8) | 0.0630(8) | 0.0261(6) | -0.0134(6) | 0.0129(5)  | -0.0272(6) |

## Supplementary Information

|      |            |            |           |            |            |            |
|------|------------|------------|-----------|------------|------------|------------|
| W008 | 0.0297(6)  | 0.0764(10) | 0.0328(6) | 0.0152(6)  | 0.0011(5)  | -0.0127(6) |
| W009 | 0.0274(6)  | 0.0810(10) | 0.0331(6) | 0.0200(6)  | 0.0030(5)  | -0.0001(6) |
| W00A | 0.0563(8)  | 0.0632(8)  | 0.0317(6) | 0.0177(6)  | 0.0220(6)  | 0.0315(7)  |
| W00B | 0.0744(10) | 0.0648(9)  | 0.0357(7) | 0.0192(6)  | 0.0274(7)  | 0.0487(8)  |
| W00C | 0.0962(12) | 0.0378(7)  | 0.0236(6) | -0.0066(5) | -0.0039(6) | 0.0312(7)  |
| P00D | 0.017(3)   | 0.030(3)   | 0.011(2)  | -0.003(2)  | 0.0033(19) | 0.009(2)   |
| O00E | 0.035(6)   | 0.053(8)   | 0.031(7)  | -0.005(7)  | 0.009(5)   | -0.006(5)  |
| O00F | 0.037(7)   | 0.060(8)   | 0.024(7)  | 0.015(6)   | 0.005(6)   | 0.005(6)   |
| O00G | 0.033(8)   | 0.036(5)   | 0.069(11) | -0.011(6)  | 0.021(7)   | -0.002(5)  |
| O00H | 0.068(10)  | 0.049(8)   | 0.028(7)  | 0.007(7)   | 0.011(7)   | 0.025(7)   |
| O00I | 0.035(8)   | 0.047(7)   | 0.031(8)  | -0.004(6)  | 0.005(6)   | 0.010(7)   |
| O00J | 0.036(8)   | 0.033(7)   | 0.060(8)  | -0.025(6)  | 0.021(7)   | -0.015(6)  |
| O00K | 0.057(7)   | 0.026(7)   | 0.043(8)  | -0.015(6)  | -0.001(6)  | 0.011(6)   |
| O00L | 0.091(9)   | 0.050(8)   | 0.028(7)  | 0.006(6)   | 0.018(6)   | 0.046(6)   |
| O00M | 0.061(9)   | 0.029(7)   | 0.032(7)  | -0.015(6)  | -0.015(6)  | 0.025(6)   |
| O00N | 0.042(7)   | 0.055(8)   | 0.036(8)  | -0.007(7)  | 0.020(6)   | -0.008(6)  |
| O00O | 0.042(8)   | 0.047(7)   | 0.036(8)  | -0.002(6)  | 0.010(6)   | 0.008(6)   |
| O00P | 0.043(7)   | 0.042(7)   | 0.025(6)  | -0.005(5)  | 0.012(4)   | 0.019(5)   |
| O00Q | 0.055(7)   | 0.043(8)   | 0.048(7)  | -0.026(6)  | 0.023(6)   | -0.017(6)  |
| O00R | 0.037(8)   | 0.035(8)   | 0.066(7)  | -0.010(6)  | 0.007(6)   | 0.003(6)   |
| O00S | 0.047(9)   | 0.076(11)  | 0.043(6)  | 0.025(6)   | 0.021(5)   | 0.024(7)   |
| O00T | 0.057(9)   | 0.031(7)   | 0.043(8)  | -0.010(7)  | -0.009(6)  | 0.012(7)   |
| O00U | 0.027(8)   | 0.031(5)   | 0.067(11) | -0.011(6)  | -0.010(6)  | 0.011(5)   |
| O00V | 0.042(8)   | 0.078(9)   | 0.029(7)  | 0.005(6)   | 0.003(6)   | -0.022(6)  |
| O00W | 0.028(6)   | 0.032(6)   | 0.040(7)  | -0.011(5)  | 0.007(4)   | 0.006(5)   |
| O00X | 0.054(9)   | 0.072(9)   | 0.033(7)  | -0.002(7)  | 0.007(7)   | -0.027(7)  |
| O00Y | 0.035(7)   | 0.039(7)   | 0.048(8)  | -0.007(6)  | -0.001(6)  | 0.008(6)   |

## Supplementary Information

|      |           |           |           |            |            |             |
|------|-----------|-----------|-----------|------------|------------|-------------|
| O00Z | 0.032(6)  | 0.033(6)  | 0.032(6)  | -0.006(5)  | 0.001(4)   | 0.003(4)    |
| O010 | 0.036(9)  | 0.089(11) | 0.049(11) | 0.030(9)   | -0.007(9)  | -0.021(9)   |
| O011 | 0.037(9)  | 0.072(11) | 0.042(6)  | 0.017(6)   | 0.015(5)   | 0.016(6)    |
| O012 | 0.050(12) | 0.041(7)  | 0.052(12) | -0.004(7)  | 0.013(9)   | -0.001(7)   |
| O013 | 0.027(7)  | 0.030(8)  | 0.082(7)  | -0.009(6)  | 0.013(5)   | -0.001(6)   |
| O014 | 0.099(8)  | 0.054(9)  | 0.028(7)  | 0.002(6)   | 0.022(6)   | 0.040(7)    |
| O015 | 0.062(13) | 0.049(7)  | 0.039(11) | 0.008(7)   | 0.023(8)   | 0.019(7)    |
| O016 | 0.037(8)  | 0.089(14) | 0.053(11) | 0.030(11)  | -0.001(8)  | 0.001(8)    |
| O017 | 0.071(10) | 0.076(7)  | 0.041(9)  | 0.021(7)   | 0.034(8)   | 0.039(7)    |
| O018 | 0.059(11) | 0.038(9)  | 0.114(15) | -0.032(11) | 0.059(11)  | -0.017(9)   |
| O01A | 0.031(8)  | 0.087(7)  | 0.052(9)  | 0.028(7)   | 0.006(7)   | -0.008(6)   |
| O01C | 0.061(10) | 0.031(9)  | 0.082(13) | -0.012(10) | -0.020(8)  | 0.004(8)    |
| O01E | 0.145(19) | 0.057(14) | 0.023(7)  | -0.007(7)  | -0.010(8)  | 0.040(10)   |
| O01F | 0.099(17) | 0.079(16) | 0.036(7)  | -0.019(8)  | 0.029(8)   | -0.042(10)  |
| O01G | 0.047(8)  | 0.028(10) | 0.093(12) | -0.006(9)  | -0.022(9)  | 0.010(7)    |
| O01H | 0.065(12) | 0.108(15) | 0.059(11) | 0.055(12)  | 0.038(10)  | 0.050(8)    |
| O01I | 0.132(17) | 0.093(13) | 0.070(14) | 0.039(11)  | 0.062(11)  | 0.092(15)   |
| O19  | 0.027(6)  | 0.056(7)  | 0.025(5)  | 0.000(5)   | 0.010(4)   | -0.002(4)   |
| O1   | 0.046(11) | 0.048(11) | 0.071(10) | -0.011(9)  | 0.031(10)  | -0.007(8)   |
| O1Z  | 0.033(9)  | 0.028(7)  | 0.044(10) | -0.018(7)  | 0.010(7)   | 0.007(6)    |
| C25  | 0.033(9)  | 0.028(7)  | 0.044(10) | -0.018(7)  | 0.010(7)   | 0.007(6)    |
| N1   | 0.025(6)  | 0.024(6)  | 0.025(6)  | 0.0000(10) | 0.0064(19) | -0.0001(10) |
| N2   | 0.040(19) | 0.004(16) | 0.03(2)   | -0.002(14) | 0.007(18)  | 0.003(12)   |
| N3   | 0.016(5)  | 0.015(5)  | 0.015(5)  | 0.0001(9)  | 0.0041(15) | 0.0000(9)   |
| N4   | 0.016(5)  | 0.015(5)  | 0.015(5)  | 0.0001(9)  | 0.0041(15) | 0.0000(9)   |
| N5   | 0.016(5)  | 0.016(5)  | 0.016(5)  | 0.0000(10) | 0.0043(17) | 0.0000(10)  |
| C1   | 0.024(15) | 0.015(15) | 0.019(19) | -0.004(13) | -0.002(14) | 0.001(11)   |

## Supplementary Information

|     |           |           |           |             |            |             |
|-----|-----------|-----------|-----------|-------------|------------|-------------|
| C2  | 0.033(14) | 0.011(16) | 0.03(2)   | -0.003(14)  | 0.007(14)  | -0.003(11)  |
| C3  | 0.035(18) | 0.008(17) | 0.03(2)   | 0.007(14)   | 0.001(18)  | -0.003(13)  |
| C4  | 0.017(6)  | 0.017(6)  | 0.017(6)  | 0.0001(10)  | 0.0045(18) | 0.0001(10)  |
| C5  | 0.034(10) | 0.036(11) | 0.044(12) | -0.019(10)  | 0.012(10)  | -0.001(8)   |
| N11 | 0.024(12) | 0.022(7)  | 0.034(7)  | 0.005(6)    | 0.008(9)   | 0.009(9)    |
| N12 | 0.024(12) | 0.022(7)  | 0.034(7)  | 0.005(6)    | 0.008(9)   | 0.009(9)    |
| N13 | 0.021(7)  | 0.021(7)  | 0.021(7)  | 0.000(2)    | 0.006(3)   | 0.000(2)    |
| N14 | 0.023(6)  | 0.023(6)  | 0.023(6)  | 0.0000(10)  | 0.0062(18) | 0.0001(10)  |
| N15 | 0.022(5)  | 0.022(5)  | 0.022(5)  | -0.0001(10) | 0.0059(17) | 0.0000(10)  |
| C11 | 0.015(19) | 0.024(7)  | 0.022(8)  | 0.002(8)    | 0.009(16)  | 0.010(17)   |
| C12 | 0.017(19) | 0.024(9)  | 0.021(8)  | 0.002(7)    | 0.006(16)  | -0.003(17)  |
| C13 | 0.03(2)   | 0.025(10) | 0.033(11) | 0.005(9)    | 0.02(2)    | 0.01(2)     |
| C14 | 0.019(6)  | 0.019(6)  | 0.019(6)  | -0.0001(10) | 0.0051(18) | 0.0000(10)  |
| C15 | 0.018(5)  | 0.019(5)  | 0.019(5)  | 0.0000(10)  | 0.0050(17) | 0.0000(10)  |
| N21 | 0.022(6)  | 0.022(6)  | 0.022(6)  | -0.0001(10) | 0.0058(17) | 0.0000(10)  |
| N22 | 0.023(6)  | 0.023(6)  | 0.023(6)  | 0.0000(10)  | 0.0061(17) | 0.0000(10)  |
| N23 | 0.02(2)   | 0.028(10) | 0.05(2)   | -0.016(13)  | 0.014(18)  | 0.012(12)   |
| N24 | 0.034(9)  | 0.025(9)  | 0.029(17) | -0.003(11)  | 0.013(9)   | 0.005(8)    |
| N25 | 0.064(14) | 0.027(8)  | 0.028(8)  | 0.003(8)    | -0.014(10) | 0.002(9)    |
| C21 | 0.036(16) | 0.025(9)  | 0.022(15) | 0.001(11)   | -0.002(13) | -0.001(10)  |
| C23 | 0.024(6)  | 0.024(6)  | 0.024(6)  | 0.0000(10)  | 0.0063(19) | 0.0000(10)  |
| O1X | 0.21(2)   | 0.21(2)   | 0.21(2)   | 0.000(2)    | 0.057(7)   | 0.000(2)    |
| O2X | 0.19(2)   | 0.19(2)   | 0.19(2)   | 0.000(2)    | 0.050(6)   | 0.000(2)    |
| O11 | 0.019(6)  | 0.020(6)  | 0.019(6)  | 0.000(2)    | 0.005(2)   | 0.000(2)    |
| C22 | 0.024(5)  | 0.024(5)  | 0.024(5)  | 0.0000(10)  | 0.0065(17) | 0.0001(10)  |
| C24 | 0.029(5)  | 0.029(5)  | 0.029(6)  | 0.0000(10)  | 0.0077(17) | -0.0002(10) |
| O21 | 0.024(15) | 0.016(19) | 0.04(3)   | 0.004(17)   | 0.010(15)  | -0.004(11)  |

## Supplementary Information

|     |           |           |           |             |            |            |
|-----|-----------|-----------|-----------|-------------|------------|------------|
| C1A | 0.06(3)   | 0.08(2)   | 0.07(3)   | 0.01(2)     | 0.03(2)    | 0.02(2)    |
| C2A | 0.054(17) | 0.060(15) | 0.065(17) | 0.014(14)   | -0.011(12) | 0.005(14)  |
| C3A | 0.041(18) | 0.032(15) | 0.051(18) | -0.003(13)  | -0.009(13) | 0.021(14)  |
| O1A | 0.041(18) | 0.032(15) | 0.051(18) | -0.003(13)  | -0.009(13) | 0.021(14)  |
| C4A | 0.07(3)   | 0.08(2)   | 0.08(3)   | 0.00(2)     | 0.010(19)  | 0.01(2)    |
| N1B | 0.029(6)  | 0.029(6)  | 0.029(6)  | -0.0002(10) | 0.0077(18) | 0.0001(10) |
| N2B | 0.081(16) | 0.045(16) | 0.023(16) | 0.004(12)   | 0.001(15)  | 0.003(14)  |
| N3B | 0.039(10) | 0.064(19) | 0.033(17) | -0.020(15)  | 0.008(13)  | 0.027(13)  |
| N4B | 0.014(6)  | 0.012(6)  | 0.012(6)  | 0.000(2)    | 0.004(3)   | -0.001(2)  |
| C1B | 0.041(8)  | 0.050(12) | 0.027(12) | -0.007(10)  | 0.010(10)  | 0.025(10)  |
| O1B | 0.041(8)  | 0.050(12) | 0.027(12) | -0.007(10)  | 0.010(10)  | 0.025(10)  |
| C2B | 0.075(13) | 0.059(14) | 0.035(14) | 0.005(11)   | -0.001(13) | 0.023(11)  |
| C3B | 0.045(11) | 0.042(16) | 0.030(16) | 0.005(14)   | 0.008(13)  | -0.009(12) |
| C4B | 0.018(11) | 0.06(3)   | 0.03(2)   | -0.01(2)    | 0.008(16)  | 0.000(13)  |
| N1A | 0.041(19) | 0.044(15) | 0.05(2)   | -0.009(15)  | 0.011(16)  | 0.035(13)  |
| N2A | 0.06(2)   | 0.09(2)   | 0.07(2)   | 0.019(17)   | 0.002(16)  | 0.011(17)  |
| N3A | 0.081(13) | 0.081(13) | 0.081(13) | 0.000(2)    | 0.021(4)   | 0.000(2)   |
| N4A | 0.05(3)   | 0.08(2)   | 0.08(3)   | 0.00(2)     | 0.00(3)    | 0.03(2)    |

Table S14. Atomic coordinates and equivalent isotropic atomic displacement parameters ( $\text{\AA}^2$ ) for compound **4**.

U(eq) is defined as one third of the trace of the orthogonalized Uij tensor.

|    | x/a        | y/b        | z/c        | U(eq)      |
|----|------------|------------|------------|------------|
| W1 | 0.88733(2) | 0.97895(2) | 0.39909(2) | 0.01480(7) |
| W2 | 0.79010(2) | 0.85356(2) | 0.25676(2) | 0.01662(8) |
| W3 | 0.85977(2) | 0.07312(2) | 0.25418(2) | 0.01691(7) |
| W4 | 0.97525(2) | 0.09779(2) | 0.12187(2) | 0.01694(8) |

## Supplementary Information

|     |           |           |             |            |
|-----|-----------|-----------|-------------|------------|
| P1  | 0.000000  | 0.000000  | 0.25813(11) | 0.0060(4)  |
| O12 | 0.0399(3) | 0.1976(3) | 0.1669(2)   | 0.0199(9)  |
| O11 | 0.000000  | 0.000000  | 0.3311(4)   | 0.0164(14) |
| O10 | 0.8735(3) | 0.0457(3) | 0.3398(2)   | 0.0181(9)  |
| O9  | 0.0681(3) | 0.0859(3) | 0.1136(2)   | 0.0202(9)  |
| O8  | 0.8074(3) | 0.9596(3) | 0.2393(2)   | 0.0202(9)  |
| O7  | 0.9516(3) | 0.1786(3) | 0.2688(2)   | 0.0210(9)  |
| O13 | 0.9299(3) | 0.9124(3) | 0.4307(2)   | 0.0177(9)  |
| O6  | 0.8835(3) | 0.0918(3) | 0.1653(2)   | 0.0205(9)  |
| O5  | 0.8258(3) | 0.8918(3) | 0.3408(2)   | 0.0187(9)  |
| O4  | 0.9346(3) | 0.9169(3) | 0.2335(2)   | 0.0146(8)  |
| O3  | 0.9664(3) | 0.1306(3) | 0.0485(2)   | 0.0283(11) |
| O2  | 0.8158(3) | 0.9611(3) | 0.4555(2)   | 0.0226(10) |
| O1  | 0.6877(3) | 0.7974(3) | 0.2654(2)   | 0.0263(11) |
| O14 | 0.7811(3) | 0.0908(3) | 0.2615(2)   | 0.0271(11) |
| O1A | 0.1111(4) | 0.3257(4) | 0.0600(3)   | 0.0499(16) |
| N3  | 0.2039(5) | 0.3571(4) | 0.1402(3)   | 0.0386(16) |
| C4  | 0.2655(5) | 0.3518(5) | 0.1685(4)   | 0.0349(18) |
| C3  | 0.1677(6) | 0.3205(6) | 0.0833(4)   | 0.043(2)   |
| N2  | 0.2002(6) | 0.2780(5) | 0.0563(3)   | 0.0460(19) |
| C2  | 0.2993(6) | 0.3130(5) | 0.1366(4)   | 0.042(2)   |
| N1  | 0.2924(6) | 0.3852(5) | 0.2264(4)   | 0.054(2)   |
| C1  | 0.2640(7) | 0.2741(6) | 0.0794(5)   | 0.049(2)   |

---

Table S14. Bond lengths (Å) for compound **4**.

---

|       |          |        |          |
|-------|----------|--------|----------|
| W1-O2 | 1.704(4) | W1-O10 | 1.888(4) |
|-------|----------|--------|----------|

## Supplementary Information

|          |           |         |           |
|----------|-----------|---------|-----------|
| W1-O13#2 | 1.893(4)  | W1-O5   | 1.918(4)  |
| W1-O13   | 1.929(4)  | W1-O11  | 2.435(4)  |
| W2-O1    | 1.699(5)  | W2-O5   | 1.898(4)  |
| W2-O8    | 1.909(5)  | W2-O7#1 | 1.917(5)  |
| W2-O12#1 | 1.925(4)  | W2-O4   | 2.436(4)  |
| W3-O14   | 1.696(5)  | W3-O8   | 1.898(5)  |
| W3-O7    | 1.914(5)  | W3-O6   | 1.908(5)  |
| W3-O10   | 1.924(4)  | W3-O4#2 | 2.445(4)  |
| W4-O3    | 1.701(5)  | W4-O9   | 1.897(4)  |
| W4-O12   | 1.917(5)  | W4-O9#1 | 1.912(4)  |
| W4-O6    | 1.922(5)  | W4-O4#2 | 2.442(4)  |
| P1-O4    | 1.532(4)  | P1-O4#1 | 1.532(4)  |
| P1-O4#2  | 1.532(4)  | P1-O11  | 1.531(8)  |
| O1A-C3   | 1.229(11) | N3-C4   | 1.362(12) |
| N3-C3    | 1.380(11) | C4-N1   | 1.347(12) |
| C4-C2    | 1.371(13) | C3-N2   | 1.364(13) |
| N2-C1    | 1.342(14) | C2-C1   | 1.393(13) |

---

Table S15. Bond angles (°) for compound **4**.

|              |           |             |            |
|--------------|-----------|-------------|------------|
| O2-W1-O10    | 103.0(2)  | O2-W1-O13#2 | 104.0(2)   |
| O10-W1-O13#2 | 90.33(19) | O2-W1-O5    | 101.0(2)   |
| O10-W1-O5    | 86.06(19) | O13#2-W1-O5 | 154.99(19) |
| O2-W1-O13    | 100.7(2)  | O10-W1-O13  | 155.97(19) |
| O13#2-W1-O13 | 87.6(3)   | O5-W1-O13   | 85.80(19)  |
| O2-W1-O11    | 171.4(2)  | O10-W1-O11  | 84.88(18)  |
| O13#2-W1-O11 | 72.23(16) | O5-W1-O11   | 82.80(17)  |
| O13-W1-O11   | 71.69(16) | O1-W2-O5    | 102.7(2)   |

## Supplementary Information

|               |            |             |            |
|---------------|------------|-------------|------------|
| O1-W2-O8      | 102.9(2)   | O5-W2-O8    | 86.21(19)  |
| O1-W2-O7#1    | 101.5(2)   | O5-W2-O7#1  | 89.4(2)    |
| O8-W2-O7#1    | 155.55(19) | O1-W2-O12#1 | 101.5(2)   |
| O5-W2-O12#1   | 155.80(19) | O8-W2-O12#1 | 87.9(2)    |
| O7#1-W2-O12#1 | 86.3(2)    | O1-W2-O4    | 171.0(2)   |
| O5-W2-O4      | .12(17)    | O8-W2-O4    | 83.30(17)  |
| O7#1-W2-O4    | 72.33(17)  | O12#1-W2-O4 | 71.88(17)  |
| O14-W3-O8     | 103.2(2)   | O14-W3-O7   | 102.2(2)   |
| O8-W3-O7      | 154.56(19) | O14-W3-O6   | 101.6(2)   |
| O8-W3-O6      | 89.5(2)    | O7-W3-O6    | 87.4(2)    |
| O14-W3-O10    | 102.8(2)   | O8-W3-O10   | 84.85(19)  |
| O7-W3-O10     | 87.60(19)  | O6-W3-O10   | 155.61(19) |
| O14-W3-O4#2   | 171.5(2)   | O8-W3-O4#2  | 82.85(17)  |
| O7-W3-O4#2    | 72.16(17)  | O6-W3-O4#2  | 72.22(17)  |
| O10-W3-O4#2   | 83.52(17)  | O3-W4-O9    | 103.3(2)   |
| O3-W4-O12     | 102.4(2)   | O9-W4-O12   | 89.4(2)    |
| O3-W4-O9#1    | 103.0(2)   | O9-W4-O9#1  | 85.5(3)    |
| O12-W4-O9#1   | 154.58(19) | O3-W4-O6    | 101.4(2)   |
| O9-W4-O6      | 155.26(19) | O12-W4-O6   | 86.5(2)    |
| O9#1-W4-O6    | 87.9(2)    | O3-W4-O4#2  | 171.3(2)   |
| O9-W4-O4#2    | 83.45(17)  | O12-W4-O4#2 | 71.85(16)  |
| O9#1-W4-O4#2  | 82.82(17)  | O6-W4-O4#2  | 72.08(16)  |
| O4-P1-O4#1    | 109.23(18) | O4-P1-O4#2  | 109.23(18) |
| O4#1-P1-O4#2  | 109.23(18) | O4-P1-O11   | 109.71(17) |
| O4#1-P1-O11   | 109.71(17) | O4#2-P1-O11 | 109.71(17) |
| W4-O12-W2#2   | 126.7(2)   | P1-O11-W1   | 125.86(14) |
| P1-O11-W1#2   | 125.86(14) | W1-O11-W1#2 | 89.2(2)    |

## Supplementary Information

|               |            |             |            |
|---------------|------------|-------------|------------|
| P1-O11-W1#1   | 125.86(14) | W1-O11-W1#1 | 89.2(2)    |
| W1#2-O11-W1#1 | 89.2(2)    | W1-O10-W3   | 151.7(3)   |
| W4-O9-W4#2    | 152.1(3)   | W3-O8-W2    | 152.4(3)   |
| W3-O7-W2#2    | 126.5(2)   | W1#1-O13-W1 | 126.8(2)   |
| W3-O6-W4      | 126.7(2)   | W2-O5-W1    | 150.5(3)   |
| P1-O4-W2      | 125.1(2)   | P1-O4-W4#1  | 126.2(2)   |
| W2-O4-W4#     | 189.49(14) | P1-O4-W3#1  | 126.3(2)   |
| W2-O4-W3#     | 188.98(14) | W4#1-O4-W3# | 188.93(14) |
| C4-N3-C3      | 124.8(8)   | N1-C4-C2    | 121.6(9)   |
| N1-C4-N3      | 119.7(8)   | C2-C4-N3    | 118.6(8)   |
| O1A-C3-N2     | 123.8(9)   | O1A-C3-N3   | 122.7(9)   |
| N2-C3-N3      | 113.5(9)   | C1-N2-C3    | 124.9(8)   |
| C4-C2-C1      | 118.3(10)  | N2-C1-C2    | 119.5(9)   |

---

Table S16. Anisotropic atomic displacement parameters (Å<sup>2</sup>) for compound **4**.

The anisotropic atomic displacement factor exponent takes the form:  $-2\pi^2 [ h^2 a^2 U_{11} + \dots + 2 h k a^* b^* U_{12} ]$

|     | U11         | U22         | U33         | U23         | U13         | U12         |
|-----|-------------|-------------|-------------|-------------|-------------|-------------|
| W1  | 0.01403(12) | 0.01785(13) | 0.01277(13) | 0.00060(8)  | 0.00209(8)  | 0.00816(10) |
| W2  | 0.01207(12) | 0.01657(13) | 0.01747(13) | -0.00119(9) | -0.00124(8) | 0.00434(10) |
| W3  | 0.01685(13) | 0.02003(14) | 0.01823(13) | 0.00123(9)  | 0.00020(9)  | 0.01251(11) |
| W4  | 0.02122(14) | 0.01833(13) | 0.01343(13) | 0.00262(8)  | -0.00066(8) | 0.01152(11) |
| P1  | 0.0051(7)   | 0.0051(7)   | 0.0077(10)  | 0.000000    | 0.000000    | 0.0026(3)   |
| O12 | 0.025(2)    | 0.016(2)    | 0.016(2)    | 0.0042(16)  | 0.0011(17)  | 0.0086(19)  |
| O11 | 0.016(2)    | 0.016(2)    | 0.017(3)    | 0.000000    | 0.000000    | 0.0080(11)  |
| O10 | 0.021(2)    | 0.017(2)    | 0.017(2)    | 0.0012(16)  | -0.0009(17) | 0.0101(19)  |
| O9  | 0.019(2)    | 0.022(2)    | 0.022(2)    | 0.0024(18)  | 0.0004(17)  | 0.013(2)    |

## Supplementary Information

|     |          |          |          |             |             |            |
|-----|----------|----------|----------|-------------|-------------|------------|
| O8  | 0.023(2) | 0.018(2) | 0.020(2) | -0.0011(17) | -0.0047(17) | 0.010(2)   |
| O7  | 0.025(2) | 0.021(2) | 0.022(2) | 0.0007(18)  | 0.0017(18)  | 0.014(2)   |
| O13 | 0.019(2) | 0.020(2) | 0.016(2) | 0.0035(16)  | 0.0032(16)  | 0.0114(19) |
| O6  | 0.021(2) | 0.023(2) | 0.019(2) | 0.0013(17)  | -0.0019(17) | 0.012(2)   |
| O5  | 0.020(2) | 0.015(2) | 0.018(2) | -0.0012(16) | -0.0003(17) | 0.0062(18) |
| O4  | 0.017(2) | 0.012(2) | 0.016(2) | 0.0001(15)  | 0.0001(16)  | 0.0076(17) |
| O3  | 0.038(3) | 0.034(3) | 0.018(2) | 0.003(2)    | -0.003(2)   | 0.022(3)   |
| O2  | 0.020(2) | 0.031(3) | 0.018(2) | 0.0002(18)  | 0.0053(17)  | 0.013(2)   |
| O1  | 0.012(2) | 0.026(3) | 0.032(3) | 0.000(2)    | 0.0000(19)  | 0.003(2)   |
| O14 | 0.023(3) | 0.041(3) | 0.028(3) | -0.001(2)   | -0.001(2)   | 0.024(2)   |
| O1A | 0.055(4) | 0.054(4) | 0.039(4) | 0.001(3)    | 0.002(3)    | 0.026(4)   |
| N3  | 0.046(4) | 0.035(4) | 0.028(3) | -0.007(3)   | 0.005(3)    | 0.014(3)   |
| C4  | 0.031(4) | 0.027(4) | 0.034(4) | 0.006(3)    | 0.006(3)    | 0.004(3)   |
| C3  | 0.043(5) | 0.043(5) | 0.026(4) | 0.008(3)    | 0.005(4)    | 0.009(4)   |
| N2  | 0.068(6) | 0.034(4) | 0.027(3) | -0.006(3)   | 0.002(3)    | 0.018(4)   |
| C2  | 0.041(5) | 0.038(5) | 0.037(4) | 0.006(4)    | 0.008(4)    | 0.012(4)   |
| N1  | 0.060(6) | 0.037(4) | 0.057(5) | 0.002(4)    | 0.007(4)    | 0.018(4)   |
| C1  | 0.067(7) | 0.042(5) | 0.036(5) | 0.006(4)    | 0.012(4)    | 0.025(5)   |

Table S17. Hydrogen atomic coordinates and isotropic atomic displacement parameters ( $\text{\AA}^2$ ) for compound **4**.

|     | x/a    | y/b | z/c    | U(eq)  |          |
|-----|--------|-----|--------|--------|----------|
| H3A | 0.1863 |     | 0.3854 | 0.1592 | 0.046000 |
| H2B | 0.3447 |     | 0.3126 | 0.1527 | 0.050000 |
| H1A | 0.2638 |     | 0.4076 | 0.2399 | 0.081000 |
| H1B | 0.2867 |     | 0.3470 | 0.2538 | 0.081000 |

## Supplementary Information

|     |        |        |        |          |
|-----|--------|--------|--------|----------|
| H1C | 0.3446 | 0.4232 | 0.2238 | 0.081000 |
| H1Z | 0.2844 | 0.2458 | 0.0574 | 0.059000 |

---

Table S18. Atomic coordinates and equivalent isotropic atomic displacement parameters ( $\text{\AA}^2$ ) for compound **5**.

U(eq) is defined as one third of the trace of the orthogonalized Uij tensor.

|      | x/a        | y/b        | z/c        | U(eq)       |
|------|------------|------------|------------|-------------|
| W1   | 0.29548(5) | 0.98570(4) | 0.90341(3) | 0.02286(11) |
| W1A  | 0.76685(5) | 0.50302(4) | 0.40430(2) | 0.02083(11) |
| W2   | 0.10828(5) | 0.74013(5) | 0.93736(2) | 0.02216(11) |
| W2A  | 0.76275(5) | 0.13222(5) | 0.43442(2) | 0.02184(11) |
| W3A  | 0.56039(4) | 0.26747(4) | 0.43581(2) | 0.01984(10) |
| W4A  | 0.53322(4) | 0.39762(4) | 0.32193(3) | 0.02043(11) |
| W3   | 0.45726(5) | 0.99614(4) | 0.77357(3) | 0.02273(11) |
| W5A  | 0.50648(5) | 0.00947(4) | 0.34298(3) | 0.02150(11) |
| W6A  | 0.96830(4) | 0.36661(5) | 0.40230(2) | 0.02222(11) |
| W4   | 0.32888(5) | 0.62750(5) | 0.93770(2) | 0.02313(11) |
| W5   | 0.51341(5) | 0.86973(5) | 0.90002(3) | 0.02316(11) |
| W7A  | 0.47519(4) | 0.14006(5) | 0.22954(2) | 0.02215(11) |
| W8A  | 0.93231(5) | 0.50751(5) | 0.27645(3) | 0.02335(12) |
| W6   | 0.06357(5) | 0.85832(5) | 0.82192(3) | 0.02281(11) |
| W7   | 0.02138(5) | 0.59786(5) | 0.73347(3) | 0.02328(11) |
| W9A  | 0.91133(5) | 0.13011(5) | 0.31744(3) | 0.02457(12) |
| W8   | 0.42554(5) | 0.76353(5) | 0.69244(2) | 0.02339(11) |
| W9   | 0.22539(5) | 0.86500(5) | 0.69207(2) | 0.02253(11) |
| W10A | 0.65441(5) | 0.01190(5) | 0.22599(3) | 0.02468(12) |
| W11A | 0.69875(5) | 0.39962(5) | 0.19453(2) | 0.02442(12) |

## Supplementary Information

|      |            |            |             |             |
|------|------------|------------|-------------|-------------|
| W10  | 0.47552(5) | 0.63357(5) | 0.81963(3)  | 0.02239(11) |
| W11  | 0.07255(5) | 0.48238(4) | 0.84867(3)  | 0.02361(12) |
| W12A | 0.87904(5) | 0.27298(5) | 0.19151(3)  | 0.02562(12) |
| W12  | 0.21910(5) | 0.49425(4) | 0.73018(3)  | 0.02342(11) |
| Si1A | 0.7207(3)  | 0.2615(3)  | 0.31490(14) | 0.0110(5)   |
| Si1  | 0.2679(3)  | 0.7426(3)  | 0.81562(15) | 0.0119(6)   |
| O4   | 0.9545(10) | 0.8998(9)  | 0.8094(5)   | 0.035(3)    |
| O41A | 0.6757(8)  | 0.2162(9)  | 0.4542(4)   | 0.025(2)    |
| O1A  | 0.7799(8)  | 0.0375(9)  | 0.2788(4)   | 0.027(2)    |
| O2A  | 0.8698(8)  | 0.4383(8)  | 0.4241(4)   | 0.024(2)    |
| O5   | 0.5222(8)  | 0.9412(8)  | 0.8313(4)   | 0.024(2)    |
| O3A  | 0.9386(9)  | 0.2236(9)  | 0.2550(4)   | 0.029(2)    |
| O6   | 0.3688(8)  | 0.0210(8)  | 0.8321(4)   | 0.027(2)    |
| O7   | 0.4067(8)  | 0.9330(8)  | 0.9222(5)   | 0.027(2)    |
| O8   | 0.4874(8)  | 0.7180(8)  | 0.7545(4)   | 0.026(2)    |
| O4A  | 0.6381(8)  | 0.0345(8)  | 0.3886(4)   | 0.024(2)    |
| O5A  | 0.8460(8)  | 0.5369(8)  | 0.3344(5)   | 0.026(2)    |
| O6A  | 0.9842(8)  | 0.4410(9)  | 0.3336(4)   | 0.025(2)    |
| O7A  | 0.4955(8)  | 0.1322(8)  | 0.3883(4)   | 0.0233(19)  |
| O9   | 0.1467(8)  | 0.8981(8)  | 0.7566(4)   | 0.025(2)    |
| O10  | 0.3075(8)  | 0.6201(8)  | 0.6914(4)   | 0.026(2)    |
| O8A  | 0.7558(8)  | 0.1370(9)  | 0.1910(5)   | 0.031(2)    |
| O9A  | 0.4669(8)  | 0.2538(8)  | 0.2836(4)   | 0.027(2)    |
| O10A | 0.5820(8)  | 0.2554(8)  | 0.1931(4)   | 0.024(2)    |
| O11  | 0.3435(8)  | 0.5299(8)  | 0.7813(4)   | 0.026(2)    |
| O11A | 0.4766(7)  | 0.3289(8)  | 0.3912(4)   | 0.0215(19)  |
| O12  | 0.1210(8)  | 0.7146(8)  | 0.6937(4)   | 0.024(2)    |

## Supplementary Information

|      |            |            |           |          |
|------|------------|------------|-----------|----------|
| O12A | 0.9971(11) | 0.0606(11) | 0.3051(6) | 0.046(3) |
| O14A | 0.4122(9)  | 0.9001(8)  | 0.3729(5) | 0.032(2) |
| O13  | 0.2325(9)  | 0.7030(8)  | 0.9552(4) | 0.025(2) |
| O15A | 0.4834(9)  | 0.2394(9)  | 0.4948(5) | 0.030(2) |
| O16A | 0.8546(8)  | 0.0738(9)  | 0.3894(5) | 0.028(2) |
| O14  | 0.0514(8)  | 0.6010(8)  | 0.8932(4) | 0.027(2) |
| O17A | 0.3595(9)  | 0.1132(9)  | 0.1881(5) | 0.032(2) |
| O18A | 0.4144(8)  | 0.0350(8)  | 0.2859(4) | 0.024(2) |
| O15  | 0.0887(8)  | 0.5037(9)  | 0.6976(4) | 0.025(2) |
| O16  | 0.5690(9)  | 0.7665(9)  | 0.8626(5) | 0.029(2) |
| O17  | 0.5557(9)  | 0.1258(8)  | 0.7700(4) | 0.029(2) |
| O18  | 0.0155(9)  | 0.7909(9)  | 0.8933(5) | 0.029(2) |
| O19  | 0.3254(11) | 0.5616(9)  | 0.9974(5) | 0.039(3) |
| O19A | 0.7892(8)  | 0.3362(9)  | 0.1523(4) | 0.029(2) |
| O20A | 0.6256(8)  | 0.4353(8)  | 0.2564(5) | 0.030(2) |
| O20  | 0.2000(9)  | 0.8951(9)  | 0.9566(4) | 0.030(2) |
| O21  | 0.0087(8)  | 0.7100(8)  | 0.7847(4) | 0.026(2) |
| O21A | 0.6644(8)  | 0.4166(8)  | 0.4573(4) | 0.025(2) |
| O22  | 0.1639(8)  | 0.9875(8)  | 0.8655(5) | 0.026(2) |
| O23  | 0.3397(10) | 0.1137(8)  | 0.9404(5) | 0.032(2) |
| O24  | 0.1291(9)  | 0.4126(7)  | 0.7897(4) | 0.026(2) |
| O22A | 0.0883(8)  | 0.4496(9)  | 0.4403(5) | 0.032(2) |
| O25  | 0.0323(9)  | 0.7106(9)  | 0.9976(5) | 0.031(2) |
| O26  | 0.3258(9)  | 0.8108(8)  | 0.6519(4) | 0.026(2) |
| O23A | 0.9532(10) | 0.2526(11) | 0.1354(5) | 0.039(3) |
| O27  | 0.4540(9)  | 0.7633(9)  | 0.9559(4) | 0.029(2) |
| O28  | 0.4231(8)  | 0.5747(8)  | 0.8907(4) | 0.026(2) |

## Supplementary Information

|      |            |            |           |            |
|------|------------|------------|-----------|------------|
| O24A | 0.6551(9)  | 0.4568(10) | 0.1411(5) | 0.036(3)   |
| O29  | 0.9716(8)  | 0.4954(8)  | 0.7916(5) | 0.028(2)   |
| O30  | 0.3517(8)  | 0.9967(8)  | 0.7162(4) | 0.026(2)   |
| C02B | 0.5343(13) | 0.7453(11) | 0.4158(7) | 0.032(3)   |
| O31  | 0.5028(10) | 0.7443(10) | 0.6371(5) | 0.036(3)   |
| O25A | 0.8311(8)  | 0.5208(9)  | 0.2206(4) | 0.027(2)   |
| O26A | 0.7854(8)  | 0.3342(8)  | 0.2629(4) | 0.0204(18) |
| O32  | 0.9838(10) | 0.3726(9)  | 0.8809(5) | 0.036(3)   |
| O33  | 0.5653(9)  | 0.5704(9)  | 0.8033(5) | 0.032(2)   |
| O27A | 0.0158(8)  | 0.2615(9)  | 0.3620(4) | 0.027(2)   |
| O28A | 0.7551(10) | 0.0603(9)  | 0.4935(5) | 0.035(3)   |
| O29A | 0.0412(9)  | 0.6323(10) | 0.2747(5) | 0.038(3)   |
| O30A | 0.5590(9)  | 0.9343(8)  | 0.2829(4) | 0.025(2)   |
| O34  | 0.6316(9)  | 0.9579(10) | 0.9392(5) | 0.035(3)   |
| O31A | 0.6396(8)  | 0.5170(8)  | 0.3672(4) | 0.0226(19) |
| O32A | 0.4336(9)  | 0.4504(9)  | 0.3088(5) | 0.030(2)   |
| O33A | 0.8976(8)  | 0.2597(8)  | 0.4544(4) | 0.027(2)   |
| O35  | 0.9025(9)  | 0.5568(10) | 0.6925(5) | 0.035(3)   |
| O36  | 0.5092(9)  | 0.9137(9)  | 0.7153(5) | 0.029(2)   |
| C2B  | 0.0857(16) | 0.5171(14) | 0.0747(8) | 0.040(4)   |
| O34A | 0.5325(8)  | 0.0375(8)  | 0.1930(4) | 0.026(2)   |
| O35A | 0.9761(8)  | 0.4214(9)  | 0.2185(4) | 0.026(2)   |
| O36A | 0.8164(9)  | 0.6276(9)  | 0.4438(5) | 0.034(3)   |
| O37  | 0.2031(8)  | 0.5209(8)  | 0.8933(4) | 0.026(2)   |
| O38  | 0.1708(10) | 0.9074(9)  | 0.6358(5) | 0.035(3)   |
| O37A | 0.6659(7)  | 0.3322(7)  | 0.3539(4) | 0.0150(16) |
| O39  | 0.2296(9)  | 0.3894(9)  | 0.6858(5) | 0.036(3)   |

## Supplementary Information

|      |            |            |           |            |
|------|------------|------------|-----------|------------|
| O5B  | 0.8672(10) | 0.6047(11) | 0.0958(5) | 0.044(3)   |
| O38A | 0.6560(10) | 0.9028(9)  | 0.1821(5) | 0.037(3)   |
| O39A | 0.8079(7)  | 0.2318(8)  | 0.3540(4) | 0.0202(18) |
| N3G  | 0.5856(13) | 0.0221(14) | 0.5904(7) | 0.050(4)   |
| O1   | 0.3226(7)  | 0.8150(8)  | 0.7625(4) | 0.0221(19) |
| O2   | 0.2057(8)  | 0.8074(8)  | 0.8555(4) | 0.0209(18) |
| O3   | 0.1776(7)  | 0.6225(7)  | 0.7904(4) | 0.0165(16) |
| O40A | 0.6246(8)  | 0.1485(7)  | 0.2890(4) | 0.0199(18) |
| O140 | 0.3628(8)  | 0.7246(7)  | 0.8542(4) | 0.0196(18) |
| N1G  | 0.2892(10) | 0.0038(11) | 0.5283(5) | 0.026(2)   |
| O1F  | 0.8726(11) | 0.3081(10) | 0.5839(5) | 0.040(3)   |
| O1G  | 0.3008(10) | 0.1402(10) | 0.5969(5) | 0.040(3)   |
| O4C  | 0.0386(12) | 0.0588(10) | 0.6754(6) | 0.046(3)   |
| N2G  | 0.4406(10) | 0.0816(10) | 0.5924(5) | 0.026(2)   |
| N2C  | 0.2208(11) | 0.2373(10) | 0.8486(6) | 0.030(3)   |
| O1E  | 0.4568(11) | 0.6854(10) | 0.3053(5) | 0.043(3)   |
| O3G  | 0.9539(11) | 0.9650(11) | 0.4595(6) | 0.048(3)   |
| N1F  | 0.7950(12) | 0.4356(11) | 0.5828(6) | 0.031(3)   |
| O4G  | 0.1164(11) | 0.8670(9)  | 0.4988(6) | 0.041(3)   |
| O1C  | 0.0372(9)  | 0.1620(11) | 0.8452(6) | 0.046(3)   |
| O5E  | 0.5982(11) | 0.8115(9)  | 0.4633(5) | 0.040(3)   |
| N1C  | 0.1246(10) | 0.1637(11) | 0.7612(6) | 0.031(3)   |
| O2F  | 0.6248(10) | 0.2168(9)  | 0.6662(5) | 0.040(3)   |
| O4F  | 0.6056(10) | 0.3999(11) | 0.5943(5) | 0.038(3)   |
| N1E  | 0.6089(12) | 0.7512(11) | 0.3670(6) | 0.033(3)   |
| O3C  | 0.7988(11) | 0.0064(12) | 0.6704(6) | 0.058(4)   |
| O2D  | 0.4222(11) | 0.3821(11) | 0.9709(5) | 0.045(3)   |

## Supplementary Information

|     |            |            |           |          |
|-----|------------|------------|-----------|----------|
| N2F | 0.9822(14) | 0.4827(13) | 0.5656(7) | 0.044(4) |
| O3F | 0.5973(10) | 0.3666(11) | 0.7456(5) | 0.040(3) |
| C8F | 0.5566(12) | 0.4003(13) | 0.6483(7) | 0.030(3) |
| C1E | 0.5544(17) | 0.7176(12) | 0.3131(8) | 0.039(4) |
| C7F | 0.6420(12) | 0.4056(11) | 0.6925(6) | 0.026(3) |
| O1X | 0.7894(18) | 0.6269(17) | 0.8390(9) | 0.099(7) |
| C1F | 0.8821(13) | 0.4043(13) | 0.5786(7) | 0.029(3) |
| N3B | 0.0240(14) | 0.5647(13) | 0.0968(7) | 0.044(4) |
| N3C | 0.4116(13) | 0.3181(13) | 0.8525(7) | 0.048(4) |
| C4C | 0.3228(14) | 0.2337(14) | 0.7642(7) | 0.036(4) |
| O4B | 0.7041(11) | 0.3216(9)  | 0.9996(5) | 0.044(3) |
| C2G | 0.4935(14) | 0.0199(15) | 0.5685(7) | 0.034(3) |
| C7C | 0.9463(13) | 0.1697(14) | 0.7221(7) | 0.032(3) |
| O2C | 0.8656(12) | 0.1537(12) | 0.7634(6) | 0.054(4) |
| O2X | 0.7778(10) | 0.3151(11) | 0.7913(6) | 0.046(3) |
| C1G | 0.3400(13) | 0.0796(11) | 0.5745(6) | 0.027(3) |
| O2E | 0.3752(12) | 0.6150(15) | 0.4571(7) | 0.069(5) |
| C3B | 0.9156(16) | 0.5503(13) | 0.0766(7) | 0.038(4) |
| N2A | 0.4895(16) | 0.9473(13) | 0.0694(7) | 0.049(4) |
| C4F | 0.8140(15) | 0.5443(14) | 0.5752(7) | 0.036(4) |
| O4E | 0.7371(13) | 0.8988(11) | 0.5632(6) | 0.055(4) |
| C6F | 0.6932(14) | 0.3323(12) | 0.6624(6) | 0.030(3) |
| N3E | 0.6247(15) | 0.7202(13) | 0.2675(7) | 0.048(4) |
| C6G | 0.1536(13) | 0.0349(12) | 0.4561(7) | 0.032(3) |
| O5C | 0.0122(14) | 0.1843(13) | 0.5438(6) | 0.059(4) |
| O2G | 0.1552(10) | 0.1390(10) | 0.4675(6) | 0.049(4) |
| C5F | 0.6883(13) | 0.3550(14) | 0.5994(7) | 0.031(3) |

## Supplementary Information

|      |            |            |           |          |
|------|------------|------------|-----------|----------|
| O2B  | 0.6414(11) | 0.5255(12) | 0.9846(7) | 0.061(4) |
| N1D  | 0.1816(15) | 0.3856(15) | 0.2790(7) | 0.058(5) |
| C5C  | 0.1212(14) | 0.1841(13) | 0.8194(7) | 0.032(3) |
| N1A  | 0.6306(16) | 0.1100(16) | 0.0492(8) | 0.064(6) |
| O5F  | 0.6071(12) | 0.5965(12) | 0.6534(6) | 0.055(4) |
| C10C | 0.0609(14) | 0.1948(15) | 0.5995(8) | 0.040(4) |
| O3AX | 0.1413(12) | 0.7386(10) | 0.1756(6) | 0.054(4) |
| O1D  | 0.1995(11) | 0.2655(13) | 0.9747(6) | 0.056(4) |
| C6E  | 0.5644(15) | 0.6323(14) | 0.4816(7) | 0.037(4) |
| O3B  | 0.6496(11) | 0.4326(11) | 0.8740(7) | 0.058(4) |
| O3X  | 0.2362(13) | 0.2425(17) | 0.3543(8) | 0.084(6) |
| C3C  | 0.3221(14) | 0.2634(15) | 0.8207(8) | 0.037(4) |
| O6X  | 0.7559(14) | 0.7334(14) | 0.7419(7) | 0.014(4) |
| C10B | 0.7138(14) | 0.4174(14) | 0.9167(7) | 0.037(4) |
| N1B  | 0.8743(12) | 0.4646(11) | 0.0357(6) | 0.036(3) |
| O4X  | 0.7285(11) | 0.9127(13) | 0.7687(8) | 0.018(4) |
| C1A  | 0.3824(19) | 0.8826(17) | 0.0846(9) | 0.051(5) |
| N3A  | 0.3080(16) | 0.9375(13) | 0.0854(7) | 0.052(5) |
| N3F  | 0.1031(15) | 0.6544(14) | 0.5470(8) | 0.055(5) |
| C6A  | 0.1896(15) | 0.8529(13) | 0.1691(8) | 0.042(4) |
| C2F  | 0.0011(17) | 0.5885(14) | 0.5565(8) | 0.042(4) |
| C6B  | 0.7541(14) | 0.4367(14) | 0.0195(8) | 0.046(5) |
| C7G  | 0.0448(12) | 0.9530(13) | 0.4319(8) | 0.035(4) |
| O5X  | 0.2478(12) | 0.5928(15) | 0.3492(8) | 0.077(5) |
| C9F  | 0.5152(15) | 0.4932(16) | 0.6533(9) | 0.044(4) |
| C4B  | 0.0407(18) | 0.4380(16) | 0.0265(8) | 0.052(5) |
| C4G  | 0.3415(15) | 0.9473(15) | 0.4988(7) | 0.038(4) |

## Supplementary Information

|      |            |            |            |          |
|------|------------|------------|------------|----------|
| O3E  | 0.5189(15) | 0.5512(14) | 0.5216(8)  | 0.079(5) |
| O2AX | 0.1279(14) | 0.9260(13) | 0.0904(6)  | 0.061(4) |
| C5E  | 0.4802(16) | 0.6260(14) | 0.4323(8)  | 0.040(4) |
| C5G  | 0.1694(12) | 0.9843(12) | 0.5119(7)  | 0.031(3) |
| O1AX | 0.3589(13) | 0.7882(12) | 0.0980(7)  | 0.064(4) |
| C3E  | 0.7416(18) | 0.7613(15) | 0.2747(8)  | 0.044(4) |
| C8B  | 0.6494(13) | 0.3061(13) | 0.9416(7)  | 0.034(3) |
| C1D  | 0.2730(14) | 0.3145(16) | 0.1303(8)  | 0.040(4) |
| C3F  | 0.9098(16) | 0.6209(13) | 0.5618(8)  | 0.040(4) |
| C6C  | 0.0170(14) | 0.0949(14) | 0.7312(7)  | 0.037(4) |
| C4D  | 0.3732(14) | 0.3582(13) | 0.0241(7)  | 0.033(3) |
| C11B | 0.7374(15) | 0.5020(14) | 0.9724(8)  | 0.039(4) |
| C1C  | 0.2263(14) | 0.1861(14) | 0.7353(8)  | 0.038(4) |
| C8D  | 0.2295(15) | 0.4053(16) | 0.2194(7)  | 0.041(4) |
| C2E  | 0.7903(19) | 0.7961(15) | 0.3291(10) | 0.053(6) |
| C4E  | 0.7220(16) | 0.7924(14) | 0.3748(8)  | 0.041(4) |
| C8G  | 0.0495(16) | 0.8443(15) | 0.4463(9)  | 0.046(5) |
| C2A  | 0.522(2)   | 0.0583(16) | 0.0598(8)  | 0.060(7) |
| C4A  | 0.330(2)   | 0.0446(19) | 0.0718(8)  | 0.066(7) |
| C7A  | 0.115(2)   | 0.9081(17) | 0.1900(9)  | 0.065(7) |
| C3G  | 0.4397(15) | 0.9456(16) | 0.5172(7)  | 0.041(4) |
| C5D  | 0.2574(13) | 0.2967(14) | 0.0236(7)  | 0.032(3) |
| C7D  | 0.2224(15) | 0.2936(18) | 0.1863(8)  | 0.048(5) |
| C6D  | 0.2100(14) | 0.2770(15) | 0.0759(9)  | 0.045(4) |
| C5B  | 0.9347(17) | 0.4131(15) | 0.0111(7)  | 0.043(4) |
| C9C  | 0.9787(15) | 0.0832(16) | 0.6269(9)  | 0.047(5) |
| C8C  | 0.8819(15) | 0.1030(15) | 0.6584(10) | 0.052(5) |

## Supplementary Information

|      |            |            |            |           |
|------|------------|------------|------------|-----------|
| N2B  | 0.1829(15) | 0.5461(15) | 0.0997(8)  | 0.059(5)  |
| C3D  | 0.4359(16) | 0.3976(19) | 0.0740(8)  | 0.052(5)  |
| C8E  | 0.7088(18) | 0.7921(15) | 0.5401(8)  | 0.047(5)  |
| C7E  | 0.5983(15) | 0.7469(13) | 0.5121(8)  | 0.036(4)  |
| C3A  | 0.436(2)   | 0.1046(15) | 0.0606(9)  | 0.070(8)  |
| O1B  | 0.7525(14) | 0.2094(11) | 0.8978(7)  | 0.070(5)  |
| N2E  | 0.7946(17) | 0.7592(17) | 0.2279(8)  | 0.072(6)  |
| O4AX | 0.0498(14) | 0.8681(12) | 0.2353(7)  | 0.068(5)  |
| C12B | 0.6457(17) | 0.2067(13) | 0.9105(8)  | 0.045(5)  |
| C9G  | 0.123(3)   | 0.816(3)   | 0.3979(15) | 0.109(11) |
| C5A  | 0.1948(18) | 0.8701(18) | 0.1039(8)  | 0.055(6)  |
| C8A  | 0.043(2)   | 0.9041(17) | 0.1362(10) | 0.063(7)  |
| C2D  | 0.3835(16) | 0.3684(18) | 0.1265(8)  | 0.049(5)  |
| C9A  | 0.981(3)   | 0.981(2)   | 0.1308(13) | 0.091(10) |
| O5AX | 0.925(2)   | 0.963(2)   | 0.0862(12) | 0.133(9)  |
| O7X  | 0.8140(15) | 0.0210(18) | 0.8652(10) | 0.108(8)  |
| O8X  | 0.9199(14) | 0.8210(14) | 0.6590(8)  | 0.079(5)  |
| O5G  | 0.127(3)   | 0.715(3)   | 0.4143(14) | 0.189(14) |
| O9X  | 0.2083(15) | 0.4958(16) | 0.5683(9)  | 0.088(6)  |
| O10X | 0.200(2)   | 0.014(2)   | 0.3159(10) | 0.117(8)  |
| O11X | 0.301(2)   | 0.367(2)   | 0.5023(10) | 0.122(8)  |

---

Table S19. Bond lengths (Å) for compound **5**.

---

|          |           |         |           |
|----------|-----------|---------|-----------|
| W1-O23   | 1.720(10) | W1-O7   | 1.899(11) |
| W1-O20   | 1.915(10) | W1-O6   | 1.937(10) |
| W1-O22   | 1.946(10) | W1-O2   | 2.375(10) |
| W1A-O36A | 1.709(10) | W1A-O2A | 1.920(10) |

## Supplementary Information

|          |           |          |           |
|----------|-----------|----------|-----------|
| W1A-O21A | 1.931(10) | W1A-O5A  | 1.939(11) |
| W1A-O31A | 1.955(9)  | W1A-O37A | 2.350(8)  |
| W2-O25   | 1.718(11) | W2-O14   | 1.911(10) |
| W2-O13   | 1.921(11) | W2-O18   | 1.926(10) |
| W2-O20   | 1.949(11) | W2-O2    | 2.356(9)  |
| W2A-O28A | 1.725(12) | W2A-O41A | 1.902(11) |
| W2A-O4A  | 1.912(10) | W2A-O16A | 1.936(11) |
| W2A-O33A | 1.943(10) | W2A-O39A | 2.336(9)  |
| W3A-O15A | 1.700(11) | W3A-O7A  | 1.917(9)  |
| W3A-O41A | 1.933(10) | W3A-O11A | 1.937(10) |
| W3A-O21A | 1.942(9)  | W3A-O37A | 2.394(8)  |
| W4A-O32A | 1.732(10) | W4A-O31A | 1.900(9)  |
| W4A-O9A  | 1.905(10) | W4A-O11A | 1.939(10) |
| W4A-O20A | 1.942(11) | W4A-O37A | 2.357(9)  |
| W3-O17   | 1.713(10) | W3-O6    | 1.892(11) |
| W3-O5    | 1.925(10) | W3-O30   | 1.931(10) |
| W3-O36   | 1.963(11) | W3-O1    | 2.359(9)  |
| W5A-O14A | 1.705(10) | W5A-O7A  | 1.918(10) |
| W5A-O18A | 1.932(10) | W5A-O4A  | 1.932(10) |
| W5A-O30A | 1.940(10) | W5A-O40A | 2.363(9)  |
| W6A-O22A | 1.731(10) | W6A-O33A | 1.905(11) |
| W6A-O27A | 1.911(11) | W6A-O2A  | 1.917(10) |
| W6A-O6A  | 1.925(10) | W6A-O39A | 2.386(9)  |
| W4-O19   | 1.699(11) | W4-O13   | 1.908(10) |
| W4-O27   | 1.927(11) | W4-O28   | 1.942(10) |
| W4-O37   | 1.944(10) | W4-O140  | 2.378(9)  |
| W5-O34   | 1.747(11) | W5-O5    | 1.914(10) |

## Supplementary Information

|           |           |           |           |
|-----------|-----------|-----------|-----------|
| W5-O16    | 1.929(11) | W5-O7     | 1.934(11) |
| W5-O27    | 1.940(10) | W5-O140   | 2.346(9)  |
| W7A-O17A  | 1.703(10) | W7A-O10A  | 1.896(10) |
| W7A-O9A   | 1.924(11) | W7A-O34A  | 1.929(10) |
| W7A-O18A  | 1.940(10) | W7A-O40A  | 2.363(9)  |
| W8A-O29A  | 1.722(11) | W8A-O5A   | 1.884(11) |
| W8A-O6A   | 1.914(10) | W8A-O25A  | 1.927(10) |
| W8A-O35A  | 1.932(10) | W8A-O26A  | 2.357(9)  |
| W6-O4     | 1.742(12) | W6-O9     | 1.879(10) |
| W6-O22    | 1.922(10) | W6-O21    | 1.938(10) |
| W6-O18    | 1.955(10) | W6-O2     | 2.357(9)  |
| W7-O35    | 1.707(10) | W7-O21    | 1.889(11) |
| W7-O12    | 1.910(10) | W7-O15    | 1.924(10) |
| W7-O29    | 1.934(10) | W7-O3     | 2.343(9)  |
| W9A-O12A  | 1.711(12) | W9A-O1A   | 1.870(10) |
| W9A-O3A   | 1.937(11) | W9A-O16A  | 1.937(11) |
| W9A-O27A  | 1.968(10) | W9A-O39A  | 2.360(9)  |
| W8-O31    | 1.714(11) | W8-O36    | 1.893(11) |
| W8-O8     | 1.909(11) | W8-O26    | 1.923(10) |
| W8-O10    | 1.931(10) | W8-O1     | 2.352(10) |
| W9-O38    | 1.728(10) | W9-O30    | 1.930(11) |
| W9-O12    | 1.935(10) | W9-O26    | 1.936(10) |
| W9-O9     | 1.952(10) | W9-O1     | 2.363(10) |
| W10A-O38A | 1.709(11) | W10A-O30A | 1.911(10) |
| W10A-O34A | 1.925(10) | W10A-O8A  | 1.926(11) |
| W10A-O1A  | 1.964(11) | W10A-O40A | 2.388(9)  |
| W11A-O24A | 1.715(11) | W11A-O20A | 1.872(11) |

## Supplementary Information

|           |           |           |           |
|-----------|-----------|-----------|-----------|
| W11A-O25A | 1.914(10) | W11A-O19A | 1.929(10) |
| W11A-O10A | 1.930(10) | W11A-O26A | 2.358(9)  |
| W10-O33   | 1.708(11) | W10-O11   | 1.916(10) |
| W10-O16   | 1.916(11) | W10-O28   | 1.917(10) |
| W10-O8    | 1.934(10) | W10-O140  | 2.341(9)  |
| W11-O32   | 1.708(11) | W11-O37   | 1.878(10) |
| W11-O24   | 1.910(10) | W11-O14   | 1.920(11) |
| W11-O29   | 1.943(11) | W11-O3    | 2.378(9)  |
| W12A-O23A | 1.706(11) | W12A-O8A  | 1.900(11) |
| W12A-O35A | 1.936(10) | W12A-O19A | 1.943(10) |
| W12A-O3A  | 1.946(11) | W12A-O26A | 2.353(10) |
| W12-O39   | 1.714(10) | W12-O11   | 1.907(10) |
| W12-O15   | 1.920(10) | W12-O10   | 1.923(10) |
| W12-O24   | 1.947(10) | W12-O3    | 2.342(9)  |
| Si1A-O40A | 1.612(10) | Si1A-O37A | 1.613(9)  |
| Si1A-O39A | 1.640(10) | Si1A-O26A | 1.644(10) |
| Si1-O1    | 1.631(10) | Si1-O140  | 1.634(10) |
| Si1-O3    | 1.636(9)  | Si1-O2    | 1.638(10) |
| C02B-O5E  | 1.414(19) | C02B-N1E  | 1.50(2)   |
| C02B-C5E  | 1.54(2)   | C2B-N3B   | 1.29(2)   |
| C2B-N2B   | 1.30(2)   | C2B-C4B   | 1.44(3)   |
| O5B-C3B   | 1.19(2)   | N3G-C2G   | 1.30(2)   |
| N1G-C4G   | 1.35(2)   | N1G-C1G   | 1.393(19) |
| N1G-C5G   | 1.533(19) | O1F-C1F   | 1.241(19) |
| O1G-C1G   | 1.195(18) | O4C-C6C   | 1.43(2)   |
| O4C-C9C   | 1.50(2)   | N2G-C2G   | 1.35(2)   |
| N2G-C1G   | 1.37(2)   | N2C-C5C   | 1.37(2)   |

## Supplementary Information

|          |           |          |           |
|----------|-----------|----------|-----------|
| N2C-C3C  | 1.42(2)   | O1E-C1E  | 1.19(2)   |
| O3G-C7G  | 1.41(2)   | N1F-C1F  | 1.35(2)   |
| N1F-C4F  | 1.38(2)   | N1F-C5F  | 1.47(2)   |
| O4G-C5G  | 1.439(18) | O4G-C8G  | 1.46(2)   |
| O1C-C5C  | 1.21(2)   | O5E-C7E  | 1.48(2)   |
| N1C-C5C  | 1.38(2)   | N1C-C1C  | 1.40(2)   |
| N1C-C6C  | 1.49(2)   | O2F-C6F  | 1.452(18) |
| O4F-C5F  | 1.43(2)   | O4F-C8F  | 1.428(19) |
| N1E-C4E  | 1.38(2)   | N1E-C1E  | 1.41(2)   |
| O3C-C8C  | 1.37(2)   | O2D-C4D  | 1.41(2)   |
| N2F-C2F  | 1.35(2)   | N2F-C1F  | 1.38(2)   |
| O3F-C7F  | 1.430(18) | C8F-C7F  | 1.50(2)   |
| C8F-C9F  | 1.51(2)   | C1E-N3E  | 1.41(2)   |
| C7F-C6F  | 1.51(2)   | N3B-C3B  | 1.43(3)   |
| N3C-C3C  | 1.31(2)   | C4C-C1C  | 1.33(2)   |
| C4C-C3C  | 1.36(2)   | O4B-C6B  | 1.441(19) |
| O4B-C8B  | 1.50(2)   | C2G-C3G  | 1.48(2)   |
| C7C-O2C  | 1.41(2)   | C7C-C6C  | 1.61(2)   |
| C7C-C8C  | 1.72(3)   | O2E-C5E  | 1.46(2)   |
| C3B-N1B  | 1.36(2)   | N2A-C2A  | 1.39(2)   |
| N2A-C1A  | 1.40(3)   | C4F-C3F  | 1.33(3)   |
| O4E-C8E  | 1.38(2)   | C6F-C5F  | 1.54(2)   |
| N3E-C3E  | 1.42(3)   | C6G-O2G  | 1.37(2)   |
| C6G-C7G  | 1.50(2)   | C6G-C5G  | 1.57(2)   |
| O5C-C10C | 1.43(2)   | O2B-C11B | 1.43(2)   |
| N1D-C8D  | 1.54(2)   | N1A-C2A  | 1.36(3)   |
| O5F-C9F  | 1.43(2)   | C10C-C9C | 1.64(3)   |

## Supplementary Information

|          |         |           |         |
|----------|---------|-----------|---------|
| O3AX-C6A | 1.41(2) | O1D-C5D   | 1.32(2) |
| C6E-O3E  | 1.44(2) | C6E-C7E   | 1.52(2) |
| C6E-C5E  | 1.57(2) | O3B-C10B  | 1.38(2) |
| C10B-C8B | 1.55(2) | C10B-C11B | 1.60(2) |
| N1B-C5B  | 1.33(2) | N1B-C6B   | 1.51(2) |
| C1A-O1AX | 1.23(2) | C1A-N3A   | 1.42(3) |
| N3A-C4A  | 1.39(3) | N3A-C5A   | 1.50(2) |
| N3F-C2F  | 1.32(2) | C6A-C7A   | 1.49(3) |
| C6A-C5A  | 1.57(2) | C2F-C3F   | 1.42(3) |
| C6B-C11B | 1.52(3) | C7G-C8G   | 1.52(2) |
| C4B-C5B  | 1.34(3) | C4G-C3G   | 1.36(2) |
| O2AX-C5A | 1.39(3) | O2AX-C8A  | 1.52(3) |
| C3E-N2E  | 1.31(2) | C3E-C2E   | 1.39(3) |
| C8B-C12B | 1.43(2) | C1D-C2D   | 1.36(2) |
| C1D-C6D  | 1.46(2) | C1D-C7D   | 1.48(2) |
| C4D-C3D  | 1.38(2) | C4D-C5D   | 1.42(2) |
| C8D-C7D  | 1.58(3) | C2E-C4E   | 1.39(3) |
| C8G-C9G  | 1.60(4) | C2A-C3A   | 1.47(4) |
| C4A-C3A  | 1.35(3) | C7A-O4AX  | 1.38(2) |
| C7A-C8A  | 1.56(3) | C5D-C6D   | 1.38(2) |
| C9C-C8C  | 1.57(3) | C3D-C2D   | 1.42(3) |
| C8E-C7E  | 1.47(3) | O1B-C12B  | 1.42(2) |
| C9G-O5G  | 1.43(4) | C8A-C9A   | 1.53(4) |
| C9A-O5AX | 1.24(3) |           |         |

Table S20. Bond angles (°) for compound **5**.

|           |          |            |          |
|-----------|----------|------------|----------|
| O23-W1-O7 | 103.0(5) | O23-W1-O20 | 101.6(5) |
|-----------|----------|------------|----------|

## Supplementary Information

|               |          |           |               |          |
|---------------|----------|-----------|---------------|----------|
| O7-W1-O20     | 90.2(5)  | O23-W1-O6 | 101.3(5)      |          |
| O7-W1-O6      | 86.3(5)  | O20-W1-O6 | 157.1(4)      |          |
| O23-W1-O22    | 98.8(5)  | O7-W1-O22 | 158.0(4)      |          |
| O20-W1-O22    | 87.5(5)  | O6-W1-O22 | 87.3(4)       |          |
| O23-W1-O2     | 170.9(5) | O7-W1-O2  | 84.5(4)       |          |
| O20-W1-O2     |          | 73.0(4)   | O6-W1-O2      | 84.2(4)  |
| O22-W1-O2     |          | 73.9(4)   | O36A-W1A-O2A  | 102.6(5) |
| O36A-W1A-O21A |          | 99.3(5)   | O2A-W1A-O21A  | 89.9(4)  |
| O36A-W1A-O5A  |          | 102.2(5)  | O2A-W1A-O5A   | 86.3(4)  |
| O21A-W1A-O5A  |          | 158.4(4)  | O36A-W1A-O31A | 98.5(5)  |
| O2A-W1A-O31A  |          | 158.8(4)  | O21A-W1A-O31A | 86.6(4)  |
| O5A-W1A-O31A  |          | 89.3(4)   | O36A-W1A-O37A | 169.2(4) |
| O2A-W1A-O37A  |          | 86.0(4)   | O21A-W1A-O37A | 74.0(3)  |
| O5A-W1A-O37A  |          | 84.5(4)   | O31A-W1A-O37A | 72.9(3)  |
| O25-W2-O14    |          | 101.5(5)  | O25-W2-O13    | 102.6(5) |
| O14-W2-O13    |          | 85.8(4)   | O25-W2-O18    | 99.5(5)  |
| O14-W2-O18    |          | 90.0(5)   | O13-W2-O18    | 157.8(4) |
| O25-W2-O20    |          | 100.5(5)  | O14-W2-O20    | 158.0(4) |
| O13-W2-O20    |          | 89.1(4)   | O18-W2-O20    | 86.7(5)  |
| O25-W2-O2     |          | 170.4(4)  | O14-W2-O2     | 85.3(4)  |
| O13-W2-O2     |          | 84.5(4)   | O18-W2-O2     | 73.5(4)  |
| O20-W2-O2     |          | 72.9(4)   | O28A-W2A-O41A | 102.8(5) |
| O28A-W2A-O4A  |          | 102.0(5)  | O41A-W2A-O4A  | 86.8(4)  |
| O28A-W2A-O16A |          | 98.1(5)   | O41A-W2A-O16A | 159.1(4) |
| O4A-W2A-O16A  |          | 88.4(4)   | O28A-W2A-O33A | 99.7(5)  |
| O41A-W2A-O33A |          | 90.9(4)   | O4A-W2A-O33A  | 158.1(4) |
| O16A-W2A-O33A |          | 86.1(4)   | O28A-W2A-O39A | 169.0(4) |

## Supplementary Information

|               |          |               |          |
|---------------|----------|---------------|----------|
| O41A-W2A-O39A | 86.0(4)  | O4A-W2A-O39A  | 84.8(4)  |
| O16A-W2A-O39A | 73.4(4)  | O33A-W2A-O39A | 73.3(4)  |
| O15A-W3A-O7A  | 102.0(5) | O15A-W3A-O41A | 101.2(5) |
| O7A-W3A-O41A  | 86.2(4)  | O15A-W3A-O11A | 100.7(5) |
| O7A-W3A-O11A  | 88.4(4)  | O41A-W3A-O11A | 158.1(4) |
| O15A-W3A-O21A | 101.4(5) | O7A-W3A-O21A  | 156.5(4) |
| O41A-W3A-O21A | 88.0(4)  | O11A-W3A-O21A | 88.6(4)  |
| O15A-W3A-O37A | 171.7(4) | O7A-W3A-O37A  | 84.0(4)  |
| O41A-W3A-O37A | 84.7(4)  | O11A-W3A-O37A | 73.6(3)  |
| O21A-W3A-O37A | 72.8(4)  | O32A-W4A-O31A | 101.5(5) |
| O32A-W4A-O9A  | 100.7(5) | O31A-W4A-O9A  | 157.7(4) |
| O32A-W4A-O11A | 98.9(5)  | O31A-W4A-O11A | 88.8(4)  |
| O9A-W4A-O11A  | 86.4(4)  | O32A-W4A-O20A | 102.8(5) |
| O31A-W4A-O20A | 90.2(4)  | O9A-W4A-O20A  | 86.2(4)  |
| O11A-W4A-O20A | 158.1(4) | O32A-W4A-O37A | 171.7(4) |
| O31A-W4A-O37A | 73.7(4)  | O9A-W4A-O37A  | 84.1(4)  |
| O11A-W4A-O37A | 74.4(3)  | O20A-W4A-O37A | 84.3(4)  |
| O17-W3-O6     | 101.5(5) | O17-W3-O5     | 101.2(5) |
| O6-W3-O5      | 85.7(4)  | O17-W3-O30    | 100.1(5) |
| O6-W3-O30     | 90.7(4)  | O5-W3-O30     | 158.7(4) |
| O17-W3-O36    | 100.0(5) | O6-W3-O36     | 158.4(4) |
| O5-W3-O36     | 88.9(4)  | O30-W3-O36    | 86.7(5)  |
| O17-W3-O1     | 170.8(4) | O6-W3-O1      | 85.6(4)  |
| O5-W3-O1      | 84.9(4)  | O30-W3-O1     | 73.8(4)  |
| O36-W3-O1     | 73.1(4)  | O14A-W5A-O7A  | 102.0(5) |
| O14A-W5A-O18A | 100.7(5) | O7A-W5A-O18A  | 87.2(4)  |
| O14A-W5A-O4A  | 101.4(5) | O7A-W5A-O4A   | 86.5(4)  |

## Supplementary Information

|               |          |               |          |
|---------------|----------|---------------|----------|
| O18A-W5A-O4A  | 157.9(4) | O14A-W5A-O30A | 100.8(5) |
| O7A-W5A-O30A  | 157.2(4) | O18A-W5A-O30A | 88.0(4)  |
| O4A-W5A-O30A  | 89.6(4)  | O14A-W5A-O40A | 171.8(4) |
| O7A-W5A-O40A  | 83.4(4)  | O18A-W5A-O40A | 73.2(4)  |
| O4A-W5A-O40A  | 85.1(4)  | O30A-W5A-O40A | 73.9(4)  |
| O22A-W6A-O33A | 101.9(5) | O22A-W6A-O27A | 101.1(5) |
| O33A-W6A-O27A | 88.9(4)  | O22A-W6A-O2A  | 101.7(5) |
| O33A-W6A-O2A  | 88.2(4)  | O27A-W6A-O2A  | 157.2(4) |
| O22A-W6A-O6A  | 101.1(5) | O33A-W6A-O6A  | 156.9(4) |
| O27A-W6A-O6A  | 88.6(4)  | O2A-W6A-O6A   | 85.4(4)  |
| O22A-W6A-O39A | 172.3(4) | O33A-W6A-O39A | 72.7(4)  |
| O27A-W6A-O39A | 73.6(4)  | O2A-W6A-O39A  | 83.9(4)  |
| O6A-W6A-O39A  | 84.5(4)  | O19-W4-O13    | 102.4(5) |
| O19-W4-O27    | 101.0(5) | O13-W4-O27    | 89.5(5)  |
| O19-W4-O28    | 100.9(5) | O13-W4-O28    | 156.6(4) |
| O27-W4-O28    | 88.8(4)  | O19-W4-O37    | 101.4(5) |
| O13-W4-O37    | 84.9(4)  | O27-W4-O37    | 157.6(4) |
| O28-W4-O37    | 87.8(4)  | O19-W4-O140   | 171.3(5) |
| O13-W4-O140   | 84.4(4)  | O27-W4-O140   | 73.4(4)  |
| O28-W4-O140   | 72.7(4)  | O37-W4-O140   | 84.5(4)  |
| O34-W5-O5     | 102.7(5) | O34-W5-O16    | 100.4(5) |
| O5-W5-O16     | 91.0(4)  | O34-W5-O7     | 101.8(5) |
| O5-W5-O7      | 85.4(4)  | O16-W5-O7     | 157.8(4) |
| O34-W5-O27    | 98.0(5)  | O5-W5-O27     | 159.2(4) |
| O16-W5-O27    | 87.0(5)  | O7-W5-O27     | 88.6(5)  |
| O34-W5-O140   | 169.2(4) | O5-W5-O140    | 85.7(4)  |
| O16-W5-O140   | 72.4(4)  | O7-W5-O140    | 85.4(4)  |

## Supplementary Information

|               |          |               |          |
|---------------|----------|---------------|----------|
| O27-W5-O140   | 73.9(4)  | O17A-W7A-O10A | 101.9(5) |
| O17A-W7A-O9A  | 100.6(5) | O10A-W7A-O9A  | 86.3(4)  |
| O17A-W7A-O34A | 101.0(5) | O10A-W7A-O34A | 89.3(4)  |
| O9A-W7A-O34A  | 158.4(4) | O17A-W7A-O18A | 99.9(5)  |
| O10A-W7A-O18A | 158.2(4) | O9A-W7A-O18A  | 88.6(4)  |
| O34A-W7A-O18A | 87.7(4)  | O17A-W7A-O40A | 171.3(4) |
| O10A-W7A-O40A | 85.4(4)  | O9A-W7A-O40A  | 84.4(4)  |
| O34A-W7A-O40A | 74.2(4)  | O18A-W7A-O40A | 73.0(4)  |
| O29A-W8A-O5A  | 102.8(5) | O29A-W8A-O6A  | 101.5(5) |
| O5A-W8A-O6A   | 85.1(4)  | O29A-W8A-O25A | 101.2(5) |
| O5A-W8A-O25A  | 88.9(4)  | O6A-W8A-O25A  | 157.3(4) |
| O29A-W8A-O35A | 99.6(5)  | O5A-W8A-O35A  | 157.6(4) |
| O6A-W8A-O35A  | 89.1(4)  | O25A-W8A-O35A | 88.1(4)  |
| O29A-W8A-O26A | 170.9(5) | O5A-W8A-O26A  | 84.5(4)  |
| O6A-W8A-O26A  | 84.4(4)  | O25A-W8A-O26A | 73.2(4)  |
| O35A-W8A-O26A | 73.4(4)  | O4-W6-O9      | 102.2(5) |
| O4-W6-O22     | 100.3(5) | O9-W6-O22     | 90.9(4)  |
| O4-W6-O21     | 102.0(5) | O9-W6-O21     | 85.3(4)  |
| O22-W6-O21    | 157.6(4) | O4-W6-O18     | 98.7(5)  |
| O9-W6-O18     | 158.9(4) | O22-W6-O18    | 88.7(5)  |
| O21-W6-O18    | 87.0(4)  | O4-W6-O2      | 170.2(5) |
| O9-W6-O2      | 86.5(4)  | O22-W6-O2     | 74.8(4)  |
| O21-W6-O2     | 83.0(4)  | O18-W6-O2     | 73.0(4)  |
| O35-W7-O21    | 102.5(5) | O35-W7-O12    | 102.6(5) |
| O21-W7-O12    | 86.1(4)  | O35-W7-O15    | 100.0(5) |
| O21-W7-O15    | 157.5(4) | O12-W7-O15    | 87.5(4)  |
| O35-W7-O29    | 99.5(5)  | O21-W7-O29    | 89.6(5)  |

## Supplementary Information

|                |          |                |          |
|----------------|----------|----------------|----------|
| O12-W7-O29     | 158.0(4) | O15-W7-O29     | 88.2(5)  |
| O35-W7-O3      | 170.4(5) | O21-W7-O3      | 84.3(4)  |
| O12-W7-O3      | 84.5(4)  | O15-W7-O3      | 73.6(4)  |
| O29-W7-O3      | 73.5(4)  | O12A-W9A-O1A   | 103.1(6) |
| O12A-W9A-O3A   | 103.3(6) | O1A-W9A-O3A    | 87.9(5)  |
| O12A-W9A-O16A  | 98.7(6)  | O1A-W9A-O16A   | 91.1(4)  |
| O3A-W9A-O16A   | 157.6(4) | O12A-W9A-O27A  | 98.6(6)  |
| O1A-W9A-O27A   | 158.3(4) | O3A-W9A-O27A   | 85.4(4)  |
| O16A-W9A-O27A  | 87.3(4)  | O12A-W9A-O39A  | 168.2(5) |
| O1A-W9A-O39A   | 85.5(4)  | O3A-W9A-O39A   | 84.9(4)  |
| O16A-W9A-O39A  | 72.8(4)  | O27A-W9A-O39A  | 73.3(4)  |
| O31-W8-O36     | 99.5(5)  | O31-W8-O8      | 101.6(5) |
| O36-W8-O8      | 91.2(4)  | O31-W8-O26     | 99.8(5)  |
| O36-W8-O26     | 87.9(4)  | O8-W8-O26      | 158.4(4) |
| O31-W8-O10     | 101.9(5) | O36-W8-O10     | 158.7(4) |
| O8-W8-O10      | 85.4(4)  | O26-W8-O10     | 87.6(4)  |
| O31-W8-O1      | 171.3(5) | O36-W8-O1      | 74.4(4)  |
| O8-W8-O1       | 84.9(4)  | O26-W8-O1      | 74.1(4)  |
| O10-W8-O1      | 84.3(4)  | O38-W9-O30     | 101.9(5) |
| O38-W9-O12     | 101.0(5) | O30-W9-O12     | 157.1(4) |
| O38-W9-O26     | 100.1(5) | O30-W9-O26     | 87.7(4)  |
| O12-W9-O26     | 89.3(4)  | O38-W9-O9      | 102.3(5) |
| O30-W9-O9      | 88.7(4)  | O12-W9-O9      | 85.5(4)  |
| O26-W9-O9      | 157.6(4) | O38-W9-O1      | 172.2(5) |
| O30-W9-O1      | 73.7(4)  | O12-W9-O1      | 83.7(4)  |
| O26-W9-O1      | 73.6(4)  | O9-W9-O1       | 84.1(4)  |
| O38A-W10A-O30A | 99.8(5)  | O38A-W10A-O34A | 101.5(5) |

## Supplementary Information

|                |          |                |          |
|----------------|----------|----------------|----------|
| O30A-W10A-O34A | 89.1(4)  | O38A-W10A-O8A  | 102.8(5) |
| O30A-W10A-O8A  | 157.2(4) | O34A-W10A-O8A  | 89.7(4)  |
| O38A-W10A-O1A  | 101.5(5) | O30A-W10A-O1A  | 88.1(4)  |
| O34A-W10A-O1A  | 157.0(4) | O8A-W10A-O1A   | 84.3(4)  |
| O38A-W10A-O40A | 171.7(5) | O30A-W10A-O40A | 73.7(4)  |
| O34A-W10A-O40A | 73.6(4)  | O8A-W10A-O40A  | 84.1(4)  |
| O1A-W10A-O40A  | 83.7(4)  | O24A-W11A-O20A | 100.7(6) |
| O24A-W11A-O25A | 100.2(5) | O20A-W11A-O25A | 89.3(4)  |
| O24A-W11A-O19A | 100.3(5) | O20A-W11A-O19A | 158.9(5) |
| O25A-W11A-O19A | 88.3(5)  | O24A-W11A-O10A | 101.8(5) |
| O20A-W11A-O10A | 84.7(4)  | O25A-W11A-O10A | 157.9(4) |
| O19A-W11A-O10A | 89.7(4)  | O24A-W11A-O26A | 171.4(4) |
| O20A-W11A-O26A | 85.1(4)  | O25A-W11A-O26A | 73.4(4)  |
| O19A-W11A-O26A | 74.1(4)  | O10A-W11A-O26A | 84.9(4)  |
| O33-W10-O11    | 100.3(5) | O33-W10-O16    | 102.1(5) |
| O11-W10-O16    | 157.5(4) | O33-W10-O28    | 100.6(5) |
| O11-W10-O28    | 89.9(4)  | O16-W10-O28    | 87.8(4)  |
| O33-W10-O8     | 101.4(5) | O11-W10-O8     | 85.2(4)  |
| O16-W10-O8     | 88.6(4)  | O28-W10-O8     | 157.9(4) |
| O33-W10-O140   | 172.5(5) | O11-W10-O140   | 85.2(4)  |
| O16-W10-O140   | 72.7(4)  | O28-W10-O140   | 74.0(4)  |
| O8-W10-O140    | 84.1(4)  | O32-W11-O37    | 102.1(5) |
| O32-W11-O24    | 102.4(5) | O37-W11-O24    | 91.1(5)  |
| O32-W11-O14    | 100.0(5) | O37-W11-O14    | 85.5(4)  |
| O24-W11-O14    | 157.6(4) | O32-W11-O29    | 99.4(5)  |
| O37-W11-O29    | 158.2(4) | O24-W11-O29    | 87.8(5)  |
| O14-W11-O29    | 87.3(4)  | O32-W11-O3     | 170.8(4) |

## Supplementary Information

|                |          |                |          |
|----------------|----------|----------------|----------|
| O37-W11-O3     | 86.3(4)  | O24-W11-O3     | 73.3(4)  |
| O14-W11-O3     | 84.4(4)  | O29-W11-O3     | 72.6(4)  |
| O23A-W12A-O8A  | 103.7(6) | O23A-W12A-O35A | 98.7(5)  |
| O8A-W12A-O35A  | 157.5(4) | O23A-W12A-O19A | 98.9(5)  |
| O8A-W12A-O19A  | 90.0(5)  | O35A-W12A-O19A | 88.2(5)  |
| O23A-W12A-O3A  | 103.2(5) | O8A-W12A-O3A   | 86.4(5)  |
| O35A-W12A-O3A  | 86.9(4)  | O19A-W12A-O3A  | 157.9(4) |
| O23A-W12A-O26A | 169.3(5) | O8A-W12A-O26A  | 84.6(4)  |
| O35A-W12A-O26A | 73.4(4)  | O19A-W12A-O26A | 74.0(4)  |
| O3A-W12A-O26A  | 83.9(4)  | O39-W12-O11    | 102.0(5) |
| O39-W12-O15    | 100.2(5) | O11-W12-O15    | 157.8(4) |
| O39-W12-O10    | 100.7(5) | O11-W12-O10    | 86.7(4)  |
| O15-W12-O10    | 89.2(4)  | O39-W12-O24    | 101.2(5) |
| O11-W12-O24    | 87.2(4)  | O15-W12-O24    | 88.6(5)  |
| O10-W12-O24    | 158.1(4) | O39-W12-O3     | 171.8(4) |
| O11-W12-O3     | 84.2(4)  | O15-W12-O3     | 73.7(4)  |
| O10-W12-O3     | 84.9(4)  | O24-W12-O3     | 73.5(4)  |
| O40A-Si1A-O37A | 109.1(5) | O40A-Si1A-O39A | 109.1(5) |
| O37A-Si1A-O39A | 109.6(5) | O40A-Si1A-O26A | 110.0(5) |
| O37A-Si1A-O26A | 109.1(5) | O39A-Si1A-O26A | 110.0(5) |
| O1-Si1-O140    | 110.7(5) | O1-Si1-O3      | 108.9(5) |
| O140-Si1-O3    | 109.4(5) | O1-Si1-O2      | 109.1(5) |
| O140-Si1-O2    | 109.2(5) | O3-Si1-O2      | 109.4(5) |
| W2A-O41A-W3A   | 150.6(6) | W9A-O1A-W10A   | 151.7(6) |
| W6A-O2A-W1A    | 150.5(6) | W5-O5-W3       | 151.4(6) |
| W9A-O3A-W12A   | 148.3(6) | W3-O6-W1       | 151.1(6) |
| W1-O7-W5       | 151.0(6) | W8-O8-W10      | 152.6(6) |

## Supplementary Information

|                |           |                |           |
|----------------|-----------|----------------|-----------|
| W2A-O4A-W5A    | 150.0(6)  | W8A-O5A-W1A    | 151.7(6)  |
| W8A-O6A-W6A    | 152.9(6)  | W3A-O7A-W5A    | 151.5(6)  |
| W6-O9-W9       | 151.7(6)  | W12-O10-W8     | 150.3(6)  |
| W12A-O8A-W10A  | 153.9(6)  | W4A-O9A-W7A    | 150.0(6)  |
| W7A-O10A-W11A  | 151.9(6)  | W12-O11-W10    | 151.7(6)  |
| W3A-O11A-W4A   | 121.3(5)  | W7-O12-W9      | 151.1(5)  |
| W4-O13-W2      | 151.8(6)  | W2A-O16A-W9A   | 121.7(5)  |
| W2-O14-W11     | 151.2(6)  | W5A-O18A-W7A   | 122.1(5)  |
| W12-O15-W7     | 121.4(5)  | W10-O16-W5     | 122.8(6)  |
| W2-O18-W6      | 121.6(5)  | W11A-O19A-W12A | 120.7(5)  |
| W11A-O20A-W4A  | 152.4(6)  | W1-O20-W2      | 122.6(6)  |
| W7-O21-W6      | 152.6(6)  | W1A-O21A-W3A   | 122.0(5)  |
| W6-O22-W1      | .7(5)     | W11-O24-W12    | 121.9(5)  |
| W8-O26-W9      | 121.2(5)  | W4-O27-W5      | 121.5(5)  |
| W10-O28-W4     | 121.9(5)  | W7-O29-W11     | 122.1(5)  |
| W9-O30-W3      | 121.5(5)  | O5E-C02B-N1E   | 108.7(13) |
| O5E-C02B-C5E   | 108.3(13) | N1E-C02B-C5E   | 110.4(13) |
| W11A-O25A-W8A  | 122.3(5)  | Si1A-O26A-W12A | 124.7(5)  |
| Si1A-O26A-W8A  | 124.4(5)  | W12A-O26A-W8A  | 91.6(3)   |
| Si1A-O26A-W11A | 124.0(5)  | W12A-O26A-W11A | 91.2(3)   |
| W8A-O26A-W11A  | 91.1(3)   | W6A-O27A-W9A   | 121.8(5)  |
| W10A-O30A-W5A  | 122.0(5)  | W4A-O31A-W1A   | 121.9(5)  |
| W6A-O33A-W2A   | 122.7(5)  | W8-O36-W3      | 121.4(5)  |
| N3B-C2B-N2B    | 115.2(19) | N3B-C2B-C4B    | 117.4(19) |
| N2B-C2B-C4B    | 127.3(19) | W10A-O34A-W7A  | 121.9(5)  |
| W8A-O35A-W12A  | 121.6(5)  | W11-O37-W4     | 152.2(6)  |
| Si1A-O37A-W1A  | 124.2(5)  | Si1A-O37A-W4A  | 125.3(5)  |

## Supplementary Information

|               |           |                |           |
|---------------|-----------|----------------|-----------|
| W1A-O37A-W4A  | 91.4(3)   | Si1A-O37A-W3A  | 124.0(4)  |
| W1A-O37A-W3A  | 91.1(3)   | W4A-O37A-W3A   | 90.6(3)   |
| Si1A-O39A-W2A | 125.1(5)  | Si1A-O39A-W9A  | 123.4(5)  |
| W2A-O39A-W9A  | 92.2(3)   | Si1A-O39A-W6A  | 124.0(5)  |
| W2A-O39A-W6A  | 91.3(3)   | W9A-O39A-W6A   | 91.2(3)   |
| Si1-O1-W8     | 124.0(5)  | Si1-O1-W3      | 123.8(5)  |
| W8-O1-W3      | 91.1(3)   | Si1-O1-W9      | 125.8(5)  |
| W8-O1-W9      | 91.0(3)   | W3-O1-W9       | 91.0(3)   |
| Si1-O2-W2     | 124.4(5)  | Si1-O2-W6      | 124.1(5)  |
| W2-O2-W6      | 91.9(3)   | Si1-O2-W1      | 124.5(5)  |
| W2-O2-W1      | 91.5(3)   | W6-O2-W1       | 90.5(3)   |
| Si1-O3-W12    | 124.6(5)  | Si1-O3-W7      | 124.4(5)  |
| W12-O3-W7     | 91.3(3)   | Si1-O3-W11     | 123.7(5)  |
| W12-O3-W11    | 91.2(3)   | W7-O3-W11      | 91.8(3)   |
| Si1A-O40A-W5A | 125.4(5)  | Si1A-O40A-W7A  | 124.3(5)  |
| W5A-O40A-W7A  | 91.6(3)   | Si1A-O40A-W10A | 124.6(5)  |
| W5A-O40A-W10A | 90.3(3)   | W7A-O40A-W10A  | 90.3(3)   |
| Si1-O140-W10  | 124.1(5)  | Si1-O140-W5    | 123.7(5)  |
| W10-O140-W5   | 92.1(3)   | Si1-O140-W4    | 124.7(5)  |
| W10-O140-W4   | 91.3(3)   | W5-O140-W4     | 91.2(3)   |
| C4G-N1G-C1G   | 122.1(14) | C4G-N1G-C5G    | 120.0(13) |
| C1G-N1G-C5G   | 117.9(12) | C6C-O4C-C9C    | 115.9(14) |
| C2G-N2G-C1G   | 125.8(13) | C5C-N2C-C3C    | 121.4(14) |
| C1F-N1F-C4F   | 117.4(15) | C1F-N1F-C5F    | 118.6(14) |
| C4F-N1F-C5F   | 123.8(15) | C5G-O4G-C8G    | 109.6(12) |
| C02B-O5E-C7E  | 112.6(12) | C5C-N1C-C1C    | 120.2(14) |
| C5C-N1C-C6C   | 116.0(14) | C1C-N1C-C6C    | 122.4(14) |

## Supplementary Information

|              |           |              |           |
|--------------|-----------|--------------|-----------|
| C5F-O4F-C8F  | 108.3(12) | C4E-N1E-C1E  | 123.4(16) |
| C4E-N1E-C02B | 121.8(14) | C1E-N1E-C02B | 114.7(14) |
| C2F-N2F-C1F  | 125.6(16) | O4F-C8F-C7F  | 106.5(12) |
| O4F-C8F-C9F  | 108.5(14) | C7F-C8F-C9F  | 116.2(14) |
| O1E-C1E-N1E  | 124.4(17) | O1E-C1E-N3E  | 121.2(18) |
| N1E-C1E-N3E  | 114.4(17) | O3F-C7F-C8F  | 114.0(12) |
| O3F-C7F-C6F  | 112.1(12) | C8F-C7F-C6F  | 100.6(12) |
| O1F-C1F-N1F  | 122.0(15) | O1F-C1F-N2F  | 120.5(15) |
| N1F-C1F-N2F  | 117.5(14) | C2B-N3B-C3B  | 126.4(17) |
| C1C-C4C-C3C  | 118.4(17) | C6B-O4B-C8B  | 111.2(13) |
| N3G-C2G-N2G  | 121.8(16) | N3G-C2G-C3G  | 121.1(16) |
| N2G-C2G-C3G  | 117.1(14) | O2C-C7C-C6C  | 111.0(13) |
| O2C-C7C-C8C  | 108.3(14) | C6C-C7C-C8C  | 97.0(12)  |
| O1G-C1G-N2G  | 121.5(14) | O1G-C1G-N1G  | 123.3(15) |
| N2G-C1G-N1G  | 115.2(13) | O5B-C3B-N1B  | 125.2(19) |
| O5B-C3B-N3B  | 122.8(16) | N1B-C3B-N3B  | 112.0(17) |
| C2A-N2A-C1A  | 123.(2)   | C3F-C4F-N1F  | 125.9(17) |
| O2F-C6F-C7F  | 110.9(12) | O2F-C6F-C5F  | 106.9(13) |
| C7F-C6F-C5F  | 103.3(13) | C1E-N3E-C3E  | 123.0(16) |
| O2G-C6G-C7G  | 113.7(14) | O2G-C6G-C5G  | 111.5(13) |
| C7G-C6G-C5G  | 102.6(12) | O4F-C5F-N1F  | 109.2(14) |
| O4F-C5F-C6F  | 106.5(13) | N1F-C5F-C6F  | 111.0(13) |
| O1C-C5C-N2C  | 119.0(16) | O1C-C5C-N1C  | 124.2(16) |
| N2C-C5C-N1C  | 116.8(15) | O5C-C10C-C9C | 102.6(14) |
| O3E-C6E-C7E  | 109.5(15) | O3E-C6E-C5E  | 113.5(15) |
| C7E-C6E-C5E  | 106.0(14) | N3C-C3C-C4C  | 123.9(18) |
| N3C-C3C-N2C  | 115.9(17) | C4C-C3C-N2C  | 120.3(15) |

## Supplementary Information

|               |           |               |           |
|---------------|-----------|---------------|-----------|
| O3B-C10B-C8B  | 109.1(14) | O3B-C10B-C11B | 115.4(15) |
| C8B-C10B-C11B | 101.4(13) | C5B-N1B-C3B   | 123.3(17) |
| C5B-N1B-C6B   | 123.4(14) | C3B-N1B-C6B   | 113.3(16) |
| O1AX-C1A-N2A  | 121.(2)   | O1AX-C1A-N3A  | 124.(2)   |
| N2A-C1A-N3A   | 114.1(18) | C4A-N3A-C1A   | 127.0(19) |
| C4A-N3A-C5A   | 119.(2)   | C1A-N3A-C5A   | 114.2(18) |
| O3AX-C6A-C7A  | 110.4(15) | O3AX-C6A-C5A  | 108.7(14) |
| C7A-C6A-C5A   | 102.9(18) | N3F-C2F-N2F   | 118.(2)   |
| N3F-C2F-C3F   | 125.4(18) | N2F-C2F-C3F   | 116.5(17) |
| O4B-C6B-N1B   | 108.9(16) | O4B-C6B-C11B  | 107.3(14) |
| N1B-C6B-C11B  | 113.6(13) | O3G-C7G-C6G   | 112.6(15) |
| O3G-C7G-C8G   | 107.9(15) | C6G-C7G-C8G   | 102.2(13) |
| O5F-C9F-C8F   | 109.4(14) | C5B-C4B-C2B   | 117.(2)   |
| N1G-C4G-C3G   | 122.6(16) | C5A-O2AX-C8A  | 105.5(16) |
| O2E-C5E-C02B  | 106.8(15) | O2E-C5E-C6E   | 108.7(15) |
| C02B-C5E-C6E  | 98.5(13)  | O4G-C5G-N1G   | 104.8(12) |
| O4G-C5G-C6G   | 104.6(12) | N1G-C5G-C6G   | 115.2(12) |
| N2E-C3E-C2E   | 125.(2)   | N2E-C3E-N3E   | 115.(2)   |
| C2E-C3E-N3E   | 119.5(17) | C12B-C8B-O4B  | 111.5(14) |
| C12B-C8B-C10B | 118.4(15) | O4B-C8B-C10B  | 102.6(12) |
| C2D-C1D-C6D   | 115.7(17) | C2D-C1D-C7D   | 120.8(18) |
| C6D-C1D-C7D   | 123.5(16) | C4F-C3F-C2F   | 117.0(15) |
| O4C-C6C-N1C   | 108.6(14) | O4C-C6C-C7C   | 106.0(13) |
| N1C-C6C-C7C   | 109.6(13) | C3D-C4D-O2D   | 120.4(16) |
| C3D-C4D-C5D   | 122.4(16) | O2D-C4D-C5D   | 117.2(15) |
| O2B-C11B-C6B  | 107.7(15) | O2B-C11B-C10B | 109.9(15) |
| C6B-C11B-C10B | 103.4(14) | C4C-C1C-N1C   | 122.5(17) |

## Supplementary Information

|              |           |              |           |
|--------------|-----------|--------------|-----------|
| N1D-C8D-C7D  | 111.0(16) | C3E-C2E-C4E  | 118.(2)   |
| N1E-C4E-C2E  | 121.2(18) | O4G-C8G-C7G  | 106.8(14) |
| O4G-C8G-C9G  | 104.8(18) | C7G-C8G-C9G  | 105.(2)   |
| N1A-C2A-N2A  | 115.(2)   | N1A-C2A-C3A  | 128.(2)   |
| N2A-C2A-C3A  | 117.3(19) | C3A-C4A-N3A  | 116.(3)   |
| O4AX-C7A-C6A | 118.6(19) | O4AX-C7A-C8A | 111.(2)   |
| C6A-C7A-C8A  | 104.2(17) | C4G-C3G-C2G  | 116.4(15) |
| O1D-C5D-C6D  | 123.0(15) | O1D-C5D-C4D  | 120.3(15) |
| C6D-C5D-C4D  | 116.6(15) | C1D-C7D-C8D  | 110.3(17) |
| C5D-C6D-C1D  | 123.4(15) | N1B-C5B-C4B  | 122.5(17) |
| O4C-C9C-C8C  | 101.3(16) | O4C-C9C-C10C | 109.3(13) |
| C8C-C9C-C10C | 111.4(15) | O3C-C8C-C9C  | 112.6(17) |
| O3C-C8C-C7C  | 107.4(16) | C9C-C8C-C7C  | 101.5(14) |
| C4D-C3D-C2D  | 118.2(18) | O4E-C8E-C7E  | 112.5(16) |
| C8E-C7E-O5E  | 108.8(14) | C8E-C7E-C6E  | 115.7(14) |
| O5E-C7E-C6E  | 100.4(13) | C4A-C3A-C2A  | 122.(2)   |
| O1B-C12B-C8B | 112.4(14) | O5G-C9G-C8G  | 102.(3)   |
| O2AX-C5A-N3A | 106.1(18) | O2AX-C5A-C6A | 109.9(18) |
| N3A-C5A-C6A  | 113.7(16) | O2AX-C8A-C9A | 108.(2)   |
| O2AX-C8A-C7A | 101.2(18) | C9A-C8A-C7A  | 123.(2)   |
| C1D-C2D-C3D  | 123.3(18) | O5AX-C9A-C8A | 115.(3)   |

Table S21. Anisotropic atomic displacement parameters ( $\text{\AA}^2$ ) for compound **5**.

The anisotropic atomic displacement factor exponent takes the form:  $-2\pi^2[ h^2 a^* U_{11} + \dots + 2 h k a^* b^* U_{12} ]$

|    | U11       | U22       | U33       | U23       | U13       | U12       |
|----|-----------|-----------|-----------|-----------|-----------|-----------|
| W1 | 0.0290(3) | 0.0178(2) | 0.0198(3) | 0.0002(2) | 0.0030(2) | 0.0069(2) |

## Supplementary Information

|      |            |            |            |              |              |            |
|------|------------|------------|------------|--------------|--------------|------------|
| W1A  | 0.0213(2)  | 0.0181(2)  | 0.0206(3)  | -0.00086(19) | -0.0001(2)   | 0.0051(2)  |
| W2   | 0.0270(3)  | 0.0227(3)  | 0.0165(3)  | 0.0053(2)    | 0.0063(2)    | 0.0085(2)  |
| W2A  | 0.0232(2)  | 0.0257(3)  | 0.0193(3)  | 0.0081(2)    | 0.0018(2)    | 0.0111(2)  |
| W3A  | 0.0223(2)  | 0.0208(2)  | 0.0164(2)  | 0.00256(19)  | 0.00510(19)  | 0.0080(2)  |
| W4A  | 0.0206(2)  | 0.0213(2)  | 0.0211(3)  | 0.0021(2)    | -0.0005(2)   | 0.0099(2)  |
| W3   | 0.0252(3)  | 0.0184(2)  | 0.0193(3)  | 0.0052(2)    | 0.0035(2)    | 0.0016(2)  |
| W5A  | 0.0234(3)  | 0.0174(2)  | 0.0213(3)  | 0.0022(2)    | 0.0027(2)    | 0.0049(2)  |
| W6A  | 0.0183(2)  | 0.0281(3)  | 0.0192(3)  | 0.0042(2)    | -0.00162(19) | 0.0072(2)  |
| W4   | 0.0277(3)  | 0.0239(3)  | 0.0181(3)  | 0.0077(2)    | 0.0006(2)    | 0.0090(2)  |
| W5   | 0.0243(3)  | 0.0211(2)  | 0.0203(3)  | 0.0013(2)    | -0.0036(2)   | 0.0045(2)  |
| W7A  | 0.0208(2)  | 0.0241(3)  | 0.0187(3)  | -0.0014(2)   | -0.0036(2)   | 0.0060(2)  |
| W8A  | 0.0204(2)  | 0.0251(3)  | 0.0210(3)  | 0.0084(2)    | 0.0024(2)    | 0.0033(2)  |
| W6   | 0.0251(3)  | 0.0245(3)  | 0.0213(3)  | 0.0056(2)    | 0.0026(2)    | 0.0115(2)  |
| W7   | 0.0218(2)  | 0.0220(3)  | 0.0217(3)  | 0.0027(2)    | -0.0036(2)   | 0.0033(2)  |
| W9A  | 0.0251(3)  | 0.0314(3)  | 0.0233(3)  | 0.0034(2)    | 0.0029(2)    | 0.0173(2)  |
| W8   | 0.0286(3)  | 0.0252(3)  | 0.0170(3)  | 0.0046(2)    | 0.0072(2)    | 0.0105(2)  |
| W9   | 0.0263(3)  | 0.0239(3)  | 0.0171(3)  | 0.0075(2)    | 0.0012(2)    | 0.0082(2)  |
| W10A | 0.0288(3)  | 0.0241(3)  | 0.0213(3)  | -0.0041(2)   | 0.0019(2)    | 0.0114(2)  |
| W11A | 0.0228(3)  | 0.0334(3)  | 0.0172(3)  | 0.0107(2)    | 0.0013(2)    | 0.0092(2)  |
| W10  | 0.0240(3)  | 0.0232(3)  | 0.0212(3)  | 0.0029(2)    | 0.0014(2)    | 0.0103(2)  |
| W11  | 0.0267(3)  | 0.0174(2)  | 0.0210(3)  | 0.0045(2)    | 0.0017(2)    | 0.0014(2)  |
| W12A | 0.0246(3)  | 0.0357(3)  | 0.0177(3)  | 0.0048(2)    | 0.0062(2)    | 0.0122(2)  |
| W12  | 0.0287(3)  | 0.0187(2)  | 0.0200(3)  | -0.0016(2)   | -0.0005(2)   | 0.0064(2)  |
| Si1A | 0.0122(12) | 0.0158(14) | 0.0065(13) | 0.0017(10)   | 0.0000(10)   | 0.0067(11) |
| Si1  | 0.0135(13) | 0.0111(13) | 0.0100(14) | 0.0021(10)   | 0.0019(11)   | 0.0032(11) |
| O4   | 0.041(6)   | 0.034(6)   | 0.033(6)   | 0.004(5)     | -0.008(5)    | 0.016(5)   |
| O41A | 0.024(5)   | 0.033(5)   | 0.017(5)   | 0.007(4)     | 0.001(4)     | 0.008(4)   |

## Supplementary Information

|      |          |          |          |           |           |          |
|------|----------|----------|----------|-----------|-----------|----------|
| O1A  | 0.027(5) | 0.029(5) | 0.022(5) | -0.001(4) | 0.005(4)  | 0.006(4) |
| O2A  | 0.023(5) | 0.022(5) | 0.025(5) | 0.001(4)  | -0.002(4) | 0.004(4) |
| O5   | 0.027(5) | 0.026(5) | 0.019(5) | 0.006(4)  | 0.005(4)  | 0.010(4) |
| O3A  | 0.030(5) | 0.039(6) | 0.022(5) | 0.003(4)  | 0.004(4)  | 0.018(5) |
| O6   | 0.029(5) | 0.025(5) | 0.020(5) | 0.002(4)  | 0.002(4)  | 0.003(4) |
| O7   | 0.030(5) | 0.016(4) | 0.030(6) | 0.000(4)  | 0.001(4)  | 0.004(4) |
| O8   | 0.025(5) | 0.023(5) | 0.026(5) | 0.004(4)  | 0.006(4)  | 0.005(4) |
| O4A  | 0.023(4) | 0.026(5) | 0.025(5) | 0.005(4)  | 0.011(4)  | 0.009(4) |
| O5A  | 0.026(5) | 0.022(5) | 0.030(5) | 0.005(4)  | -0.003(4) | 0.008(4) |
| O6A  | 0.024(5) | 0.034(5) | 0.018(5) | 0.008(4)  | 0.008(4)  | 0.010(4) |
| O7A  | 0.025(5) | 0.022(4) | 0.022(5) | 0.002(4)  | -0.002(4) | 0.008(4) |
| O9   | 0.028(5) | 0.024(5) | 0.021(5) | 0.006(4)  | 0.004(4)  | 0.008(4) |
| O10  | 0.026(5) | 0.029(5) | 0.020(5) | 0.000(4)  | 0.000(4)  | 0.006(4) |
| O8A  | 0.026(5) | 0.035(6) | 0.032(6) | 0.003(5)  | 0.003(4)  | 0.012(4) |
| O9A  | 0.031(5) | 0.026(5) | 0.024(5) | 0.007(4)  | -0.003(4) | 0.010(4) |
| O10A | 0.017(4) | 0.035(5) | 0.019(5) | 0.008(4)  | 0.003(3)  | 0.009(4) |
| O11  | 0.030(5) | 0.026(5) | 0.022(5) | 0.003(4)  | 0.004(4)  | 0.013(4) |
| O11A | 0.018(4) | 0.024(5) | 0.020(5) | 0.002(4)  | 0.002(3)  | 0.005(4) |
| O12  | 0.028(5) | 0.024(5) | 0.016(5) | 0.000(4)  | -0.001(4) | 0.005(4) |
| O12A | 0.047(7) | 0.054(8) | 0.055(9) | 0.007(7)  | -0.001(6) | 0.039(7) |
| O14A | 0.034(6) | 0.025(5) | 0.032(6) | 0.005(4)  | 0.009(5)  | 0.006(4) |
| O13  | 0.036(5) | 0.018(4) | 0.021(5) | 0.001(4)  | 0.004(4)  | 0.009(4) |
| O15A | 0.029(5) | 0.039(6) | 0.023(5) | -0.003(5) | 0.003(4)  | 0.015(5) |
| O16A | 0.023(5) | 0.032(5) | 0.035(6) | 0.013(5)  | 0.005(4)  | 0.015(4) |
| O14  | 0.030(5) | 0.028(5) | 0.019(5) | 0.003(4)  | 0.003(4)  | 0.005(4) |
| O17A | 0.040(6) | 0.028(5) | 0.025(5) | -0.007(4) | -0.013(5) | 0.012(5) |
| O18A | 0.021(4) | 0.024(5) | 0.024(5) | -0.002(4) | 0.000(4)  | 0.007(4) |

## Supplementary Information

|      |          |          |          |           |           |           |
|------|----------|----------|----------|-----------|-----------|-----------|
| O15  | 0.032(5) | 0.036(5) | 0.011(4) | -0.001(4) | -0.003(4) | 0.017(4)  |
| O16  | 0.031(5) | 0.032(6) | 0.026(5) | 0.007(4)  | -0.002(4) | 0.013(4)  |
| O17  | 0.040(6) | 0.020(5) | 0.023(5) | 0.002(4)  | 0.005(4)  | 0.005(4)  |
| O18  | 0.034(5) | 0.031(5) | 0.028(6) | 0.011(4)  | 0.009(4)  | 0.020(5)  |
| O19  | 0.055(8) | 0.032(6) | 0.039(7) | 0.018(5)  | 0.008(6)  | 0.025(6)  |
| O19A | 0.029(5) | 0.039(6) | 0.025(5) | 0.009(5)  | 0.004(4)  | 0.019(5)  |
| O20A | 0.026(5) | 0.028(5) | 0.028(6) | 0.004(4)  | 0.000(4)  | 0.002(4)  |
| O20  | 0.036(6) | 0.029(5) | 0.021(5) | 0.008(4)  | 0.007(4)  | 0.009(5)  |
| O21  | 0.023(5) | 0.031(5) | 0.023(5) | 0.003(4)  | -0.003(4) | 0.008(4)  |
| O21A | 0.026(5) | 0.027(5) | 0.017(5) | -0.002(4) | -0.002(4) | 0.003(4)  |
| O22  | 0.031(5) | 0.019(4) | 0.030(6) | 0.005(4)  | 0.002(4)  | 0.010(4)  |
| O23  | 0.048(7) | 0.021(5) | 0.023(5) | -0.002(4) | 0.001(5)  | 0.012(5)  |
| O24  | 0.035(5) | 0.014(4) | 0.023(5) | 0.002(4)  | 0.006(4)  | 0.002(4)  |
| O22A | 0.020(5) | 0.037(6) | 0.031(6) | 0.003(5)  | -0.008(4) | 0.001(4)  |
| O25  | 0.034(6) | 0.033(6) | 0.027(6) | 0.008(5)  | 0.009(5)  | 0.012(5)  |
| O26  | 0.034(5) | 0.030(5) | 0.017(5) | -0.001(4) | -0.002(4) | 0.016(4)  |
| O23A | 0.039(6) | 0.062(8) | 0.024(6) | 0.010(5)  | 0.018(5)  | 0.026(6)  |
| O27  | 0.035(6) | 0.034(5) | 0.015(5) | 0.003(4)  | 0.003(4)  | 0.010(5)  |
| O28  | 0.032(5) | 0.027(5) | 0.018(5) | 0.005(4)  | 0.005(4)  | 0.010(4)  |
| O24A | 0.031(6) | 0.050(7) | 0.024(6) | 0.019(5)  | -0.002(4) | 0.008(5)  |
| O29  | 0.021(5) | 0.018(4) | 0.034(6) | 0.004(4)  | 0.002(4)  | -0.003(4) |
| O30  | 0.030(5) | 0.030(5) | 0.023(5) | 0.012(4)  | 0.005(4)  | 0.013(4)  |
| C02B | 0.038(8) | 0.019(6) | 0.041(9) | -0.003(6) | 0.000(7)  | 0.013(6)  |
| O31  | 0.041(6) | 0.040(6) | 0.027(6) | 0.008(5)  | 0.014(5)  | 0.016(5)  |
| O25A | 0.024(5) | 0.034(5) | 0.018(5) | 0.007(4)  | 0.003(4)  | 0.006(4)  |
| O26A | 0.024(4) | 0.021(4) | 0.014(4) | 0.005(3)  | 0.002(3)  | 0.006(4)  |
| O32  | 0.043(7) | 0.022(5) | 0.035(6) | 0.008(5)  | 0.003(5)  | 0.003(5)  |

## Supplementary Information

|      |           |           |           |           |           |           |
|------|-----------|-----------|-----------|-----------|-----------|-----------|
| O33  | 0.028(5)  | 0.033(6)  | 0.037(6)  | 0.004(5)  | 0.002(5)  | 0.012(5)  |
| O27A | 0.022(5)  | 0.037(6)  | 0.022(5)  | 0.007(4)  | 0.002(4)  | 0.011(4)  |
| O28A | 0.040(6)  | 0.032(6)  | 0.038(7)  | 0.008(5)  | 0.004(5)  | 0.019(5)  |
| O29A | 0.031(6)  | 0.038(6)  | 0.034(6)  | 0.016(5)  | 0.001(5)  | -0.001(5) |
| O30A | 0.035(5)  | 0.020(4)  | 0.016(5)  | -0.003(4) | -0.004(4) | 0.007(4)  |
| O34  | 0.033(6)  | 0.039(6)  | 0.033(6)  | 0.003(5)  | -0.009(5) | 0.012(5)  |
| O31A | 0.025(5)  | 0.025(5)  | 0.019(5)  | 0.001(4)  | -0.002(4) | 0.012(4)  |
| O32A | 0.028(5)  | 0.041(6)  | 0.030(6)  | 0.001(5)  | 0.001(4)  | 0.023(5)  |
| O33A | 0.031(5)  | 0.031(5)  | 0.022(5)  | 0.000(4)  | -0.009(4) | 0.016(4)  |
| O35  | 0.024(5)  | 0.040(6)  | 0.029(6)  | 0.002(5)  | -0.007(4) | -0.001(5) |
| O36  | 0.031(5)  | 0.032(5)  | 0.028(6)  | 0.014(4)  | 0.013(4)  | 0.012(4)  |
| C2B  | 0.048(10) | 0.032(8)  | 0.045(11) | 0.008(7)  | 0.008(8)  | 0.018(8)  |
| O34A | 0.026(5)  | 0.023(5)  | 0.028(5)  | -0.002(4) | 0.003(4)  | 0.007(4)  |
| O35A | 0.021(4)  | 0.038(6)  | 0.016(5)  | 0.001(4)  | 0.003(4)  | 0.009(4)  |
| O36A | 0.030(5)  | 0.029(5)  | 0.034(6)  | -0.009(5) | -0.005(5) | 0.005(5)  |
| O37  | 0.033(5)  | 0.017(4)  | 0.024(5)  | 0.005(4)  | -0.006(4) | 0.006(4)  |
| O38  | 0.050(7)  | 0.035(6)  | 0.022(5)  | 0.015(5)  | -0.001(5) | 0.016(5)  |
| O37A | 0.019(4)  | 0.013(4)  | 0.015(4)  | 0.004(3)  | 0.004(3)  | 0.007(3)  |
| O39  | 0.039(6)  | 0.034(6)  | 0.027(6)  | -0.021(5) | -0.005(5) | 0.009(5)  |
| O5B  | 0.043(7)  | 0.043(7)  | 0.032(7)  | -0.004(6) | 0.007(6)  | 0.001(6)  |
| O38A | 0.044(7)  | 0.029(6)  | 0.036(7)  | -0.008(5) | -0.002(5) | 0.015(5)  |
| O39A | 0.020(4)  | 0.026(5)  | 0.017(4)  | 0.006(4)  | 0.005(3)  | 0.011(4)  |
| N3G  | 0.040(8)  | 0.065(11) | 0.051(10) | 0.000(9)  | -0.014(7) | 0.030(8)  |
| O1   | 0.019(4)  | 0.021(4)  | 0.023(5)  | 0.005(4)  | 0.001(4)  | 0.003(4)  |
| O2   | 0.023(4)  | 0.027(5)  | 0.019(5)  | 0.004(4)  | 0.005(4)  | 0.016(4)  |
| O3   | 0.020(4)  | 0.016(4)  | 0.009(4)  | 0.000(3)  | 0.001(3)  | 0.003(3)  |
| O40A | 0.024(4)  | 0.017(4)  | 0.020(5)  | 0.000(3)  | 0.000(4)  | 0.010(4)  |

## Supplementary Information

|      |           |          |          |           |           |           |
|------|-----------|----------|----------|-----------|-----------|-----------|
| O14O | 0.023(4)  | 0.019(4) | 0.016(4) | 0.002(3)  | 0.006(3)  | 0.008(4)  |
| N1G  | 0.027(6)  | 0.034(6) | 0.023(6) | 0.004(5)  | 0.001(5)  | 0.017(5)  |
| O1F  | 0.052(7)  | 0.041(6) | 0.039(7) | 0.013(5)  | 0.017(6)  | 0.029(6)  |
| O1G  | 0.039(6)  | 0.042(7) | 0.041(7) | -0.003(6) | 0.006(5)  | 0.020(6)  |
| O4C  | 0.062(8)  | 0.036(6) | 0.047(8) | 0.003(6)  | -0.010(7) | 0.026(6)  |
| N2G  | 0.027(6)  | 0.025(6) | 0.025(6) | 0.004(5)  | -0.001(5) | 0.010(5)  |
| N2C  | 0.031(6)  | 0.029(6) | 0.024(6) | -0.005(5) | -0.010(5) | 0.003(5)  |
| O1E  | 0.044(7)  | 0.038(7) | 0.039(7) | 0.008(6)  | -0.008(6) | 0.007(6)  |
| O3G  | 0.034(6)  | 0.052(8) | 0.056(9) | 0.010(7)  | 0.010(6)  | 0.011(6)  |
| N1F  | 0.045(7)  | 0.027(6) | 0.023(6) | 0.004(5)  | 0.005(5)  | 0.015(5)  |
| O4G  | 0.053(7)  | 0.021(5) | 0.047(8) | 0.008(5)  | -0.002(6) | 0.010(5)  |
| O1C  | 0.023(5)  | 0.048(7) | 0.052(8) | -0.009(6) | 0.004(5)  | 0.000(5)  |
| O5E  | 0.069(9)  | 0.026(5) | 0.028(6) | 0.000(5)  | -0.008(6) | 0.024(6)  |
| N1C  | 0.025(6)  | 0.033(7) | 0.034(7) | 0.001(6)  | -0.002(5) | 0.010(5)  |
| O2F  | 0.046(7)  | 0.028(6) | 0.037(7) | 0.003(5)  | 0.006(6)  | 0.003(5)  |
| O4F  | 0.048(7)  | 0.052(7) | 0.021(6) | -0.003(5) | -0.009(5) | 0.029(6)  |
| N1E  | 0.056(9)  | 0.034(7) | 0.022(6) | 0.007(5)  | 0.003(6)  | 0.030(7)  |
| O3C  | 0.046(8)  | 0.056(9) | 0.051(9) | 0.010(7)  | 0.005(7)  | -0.005(7) |
| O2D  | 0.044(7)  | 0.050(7) | 0.032(7) | 0.007(6)  | 0.007(6)  | 0.007(6)  |
| N2F  | 0.048(9)  | 0.043(9) | 0.050(9) | 0.029(7)  | 0.019(7)  | 0.022(7)  |
| O3F  | 0.043(7)  | 0.060(8) | 0.024(6) | 0.007(5)  | 0.012(5)  | 0.028(6)  |
| C8F  | 0.022(6)  | 0.032(8) | 0.028(8) | 0.004(6)  | 0.000(5)  | 0.003(6)  |
| C1E  | 0.065(12) | 0.015(6) | 0.033(9) | 0.010(6)  | 0.009(8)  | 0.011(7)  |
| C7F  | 0.024(6)  | 0.020(6) | 0.030(8) | -0.002(5) | 0.001(5)  | 0.004(5)  |
| O1X  | 0.097(7)  | 0.100(7) | 0.100(7) | 0.010(3)  | 0.003(3)  | 0.037(4)  |
| C1F  | 0.036(8)  | 0.029(7) | 0.025(7) | 0.004(6)  | 0.005(6)  | 0.017(6)  |
| N3B  | 0.050(9)  | 0.040(8) | 0.031(8) | -0.003(6) | 0.005(7)  | 0.006(7)  |

## Supplementary Information

|      |           |           |           |           |           |           |
|------|-----------|-----------|-----------|-----------|-----------|-----------|
| N3C  | 0.054(10) | 0.041(8)  | 0.043(9)  | 0.009(7)  | -0.003(8) | 0.011(8)  |
| C4C  | 0.038(8)  | 0.041(9)  | 0.034(9)  | -0.004(7) | 0.003(7)  | 0.020(7)  |
| O4B  | 0.054(8)  | 0.021(5)  | 0.039(7)  | 0.007(5)  | 0.002(6)  | -0.005(5) |
| C2G  | 0.035(8)  | 0.050(10) | 0.026(8)  | 0.007(7)  | 0.002(6)  | 0.025(7)  |
| C7C  | 0.034(8)  | 0.041(9)  | 0.029(8)  | 0.005(7)  | -0.005(6) | 0.021(7)  |
| O2C  | 0.071(10) | 0.070(9)  | 0.045(8)  | 0.014(7)  | 0.021(7)  | 0.051(8)  |
| O2X  | 0.041(7)  | 0.046(7)  | 0.048(8)  | 0.004(6)  | 0.005(6)  | 0.011(6)  |
| C1G  | 0.034(7)  | 0.016(6)  | 0.026(7)  | -0.002(5) | 0.009(6)  | 0.004(5)  |
| O2E  | 0.042(8)  | 0.110(14) | 0.053(10) | 0.010(9)  | 0.010(7)  | 0.027(8)  |
| C3B  | 0.054(10) | 0.028(7)  | 0.020(7)  | 0.007(6)  | 0.012(7)  | 0.002(7)  |
| N2A  | 0.072(11) | 0.045(9)  | 0.025(7)  | 0.012(7)  | 0.019(7)  | 0.014(8)  |
| C4F  | 0.045(9)  | 0.041(9)  | 0.027(8)  | 0.008(7)  | -0.001(7) | 0.023(8)  |
| O4E  | 0.078(10) | 0.041(7)  | 0.042(8)  | 0.003(6)  | -0.005(7) | 0.019(7)  |
| C6F  | 0.040(8)  | 0.033(7)  | 0.020(7)  | 0.006(6)  | 0.014(6)  | 0.016(7)  |
| N3E  | 0.072(12) | 0.044(9)  | 0.029(8)  | 0.012(7)  | 0.007(8)  | 0.022(8)  |
| C6G  | 0.032(7)  | 0.027(7)  | 0.027(8)  | 0.013(6)  | 0.000(6)  | 0.000(6)  |
| O5C  | 0.083(11) | 0.078(10) | 0.028(7)  | 0.007(7)  | -0.005(7) | 0.044(9)  |
| O2G  | 0.039(7)  | 0.044(7)  | 0.060(9)  | 0.032(7)  | -0.003(6) | 0.006(6)  |
| C5F  | 0.032(7)  | 0.036(8)  | 0.026(8)  | 0.002(6)  | 0.000(6)  | 0.012(6)  |
| O2B  | 0.038(7)  | 0.055(9)  | 0.082(12) | -0.020(8) | 0.014(7)  | 0.014(7)  |
| N1D  | 0.064(11) | 0.070(12) | 0.031(9)  | 0.021(8)  | 0.011(8)  | 0.012(9)  |
| C5C  | 0.042(9)  | 0.028(7)  | 0.034(9)  | 0.005(6)  | -0.003(7) | 0.021(7)  |
| N1A  | 0.070(13) | 0.060(12) | 0.044(11) | 0.016(9)  | 0.002(9)  | 0.004(10) |
| O5F  | 0.068(10) | 0.054(9)  | 0.052(9)  | 0.002(7)  | 0.009(7)  | 0.035(8)  |
| C10C | 0.030(8)  | 0.048(10) | 0.043(10) | 0.003(8)  | 0.002(7)  | 0.015(8)  |
| O3AX | 0.076(10) | 0.027(6)  | 0.036(7)  | -0.001(5) | 0.007(7)  | -0.007(6) |
| O1D  | 0.042(7)  | 0.092(12) | 0.033(7)  | -0.001(7) | 0.008(6)  | 0.024(8)  |

## Supplementary Information

|      |           |           |           |            |           |           |
|------|-----------|-----------|-----------|------------|-----------|-----------|
| C6E  | 0.047(9)  | 0.038(9)  | 0.028(8)  | 0.014(7)   | 0.005(7)  | 0.016(7)  |
| O3B  | 0.049(8)  | 0.044(8)  | 0.073(11) | -0.007(7)  | -0.029(8) | 0.010(6)  |
| O3X  | 0.040(8)  | 0.124(16) | 0.080(13) | 0.041(12)  | 0.015(8)  | 0.016(9)  |
| C3C  | 0.033(8)  | 0.040(9)  | 0.035(9)  | 0.007(7)   | -0.010(7) | 0.009(7)  |
| O6X  | 0.012(8)  | 0.018(9)  | 0.009(8)  | -0.001(6)  | 0.002(6)  | 0.003(7)  |
| C10B | 0.038(9)  | 0.044(9)  | 0.031(9)  | 0.008(7)   | 0.005(7)  | 0.015(7)  |
| N1B  | 0.045(8)  | 0.026(6)  | 0.024(7)  | 0.002(5)   | 0.003(6)  | -0.003(6) |
| O4X  | 0.004(6)  | 0.018(8)  | 0.028(10) | 0.000(7)   | 0.001(6)  | 0.001(6)  |
| C1A  | 0.069(14) | 0.040(10) | 0.032(10) | -0.007(8)  | 0.004(9)  | 0.011(10) |
| N3A  | 0.068(12) | 0.031(7)  | 0.035(8)  | 0.002(6)   | 0.016(8)  | -0.007(7) |
| N3F  | 0.060(11) | 0.051(10) | 0.045(10) | 0.010(8)   | 0.015(8)  | 0.010(9)  |
| C6A  | 0.039(9)  | 0.028(8)  | 0.038(10) | -0.003(7)  | 0.003(7)  | -0.010(7) |
| C2F  | 0.063(12) | 0.030(8)  | 0.029(9)  | 0.004(7)   | 0.004(8)  | 0.012(8)  |
| C6B  | 0.036(9)  | 0.034(8)  | 0.042(10) | -0.010(7)  | 0.023(8)  | -0.013(7) |
| C7G  | 0.018(6)  | 0.031(8)  | 0.051(11) | -0.002(7)  | -0.009(6) | 0.005(6)  |
| O5X  | 0.039(8)  | 0.098(14) | 0.077(12) | -0.013(11) | -0.002(8) | 0.011(8)  |
| C9F  | 0.043(10) | 0.054(11) | 0.048(11) | 0.011(9)   | 0.005(8)  | 0.032(9)  |
| C4B  | 0.068(14) | 0.045(11) | 0.024(9)  | -0.005(8)  | -0.010(9) | 0.004(10) |
| C4G  | 0.046(10) | 0.045(10) | 0.024(8)  | -0.007(7)  | 0.004(7)  | 0.020(8)  |
| O3E  | 0.080(6)  | 0.078(6)  | 0.076(6)  | 0.011(3)   | 0.001(3)  | 0.027(3)  |
| O2AX | 0.078(11) | 0.058(9)  | 0.036(8)  | 0.007(7)   | -0.005(8) | 0.014(8)  |
| C5E  | 0.051(10) | 0.036(9)  | 0.035(9)  | 0.007(7)   | 0.004(8)  | 0.019(8)  |
| C5G  | 0.028(7)  | 0.028(7)  | 0.032(8)  | 0.000(6)   | -0.002(6) | 0.005(6)  |
| O1AX | 0.073(11) | 0.041(8)  | 0.056(10) | 0.006(7)   | 0.008(8)  | -0.002(7) |
| C3E  | 0.068(13) | 0.039(9)  | 0.031(9)  | 0.016(7)   | 0.017(9)  | 0.024(9)  |
| C8B  | 0.024(7)  | 0.031(8)  | 0.041(9)  | 0.009(7)   | 0.003(6)  | 0.005(6)  |
| C1D  | 0.030(8)  | 0.056(11) | 0.039(10) | 0.018(8)   | 0.010(7)  | 0.020(8)  |

## Supplementary Information

|      |           |           |           |            |           |            |
|------|-----------|-----------|-----------|------------|-----------|------------|
| C3F  | 0.063(12) | 0.023(7)  | 0.038(10) | 0.006(7)   | 0.002(8)  | 0.020(8)   |
| C6C  | 0.037(8)  | 0.038(9)  | 0.033(9)  | -0.009(7)  | -0.006(7) | 0.014(7)   |
| C4D  | 0.049(9)  | 0.028(7)  | 0.031(8)  | 0.003(6)   | 0.011(7)  | 0.025(7)   |
| C11B | 0.039(9)  | 0.032(8)  | 0.039(10) | -0.007(7)  | 0.008(7)  | 0.006(7)   |
| C1C  | 0.034(8)  | 0.041(9)  | 0.036(9)  | 0.019(7)   | 0.008(7)  | 0.011(7)   |
| C8D  | 0.038(9)  | 0.062(12) | 0.027(8)  | 0.005(8)   | 0.009(7)  | 0.025(9)   |
| C2E  | 0.059(13) | 0.032(9)  | 0.064(14) | 0.011(9)   | 0.027(11) | 0.010(9)   |
| C4E  | 0.051(11) | 0.034(9)  | 0.039(10) | 0.007(7)   | -0.009(8) | 0.015(8)   |
| C8G  | 0.042(10) | 0.037(9)  | 0.054(12) | -0.004(8)  | -0.022(9) | 0.010(8)   |
| C2A  | 0.089(17) | 0.030(9)  | 0.031(10) | -0.004(7)  | 0.010(11) | -0.010(10) |
| C4A  | 0.072(15) | 0.061(14) | 0.031(10) | -0.004(10) | 0.018(10) | -0.012(12) |
| C7A  | 0.10(2)   | 0.036(10) | 0.041(12) | 0.003(9)   | 0.029(12) | 0.011(11)  |
| C3G  | 0.047(10) | 0.053(11) | 0.031(9)  | -0.010(8)  | 0.001(7)  | 0.032(9)   |
| C5D  | 0.028(7)  | 0.042(9)  | 0.026(8)  | -0.001(7)  | 0.003(6)  | 0.016(7)   |
| C7D  | 0.032(8)  | 0.073(14) | 0.040(10) | 0.009(10)  | 0.009(8)  | 0.020(9)   |
| C6D  | 0.025(7)  | 0.046(10) | 0.057(12) | -0.001(9)  | -0.004(8) | 0.009(7)   |
| C5B  | 0.069(13) | 0.039(9)  | 0.018(8)  | -0.002(7)  | -0.003(8) | 0.019(9)   |
| C9C  | 0.035(9)  | 0.051(11) | 0.053(12) | -0.024(9)  | -0.010(8) | 0.019(8)   |
| C8C  | 0.041(10) | 0.043(10) | 0.076(15) | 0.022(10)  | 0.007(10) | 0.018(8)   |
| N2B  | 0.054(11) | 0.058(11) | 0.061(12) | 0.000(9)   | -0.003(9) | 0.017(9)   |
| C3D  | 0.034(9)  | 0.086(16) | 0.029(9)  | -0.007(10) | -0.001(7) | 0.019(10)  |
| C8E  | 0.080(14) | 0.045(10) | 0.028(9)  | -0.004(8)  | -0.004(9) | 0.039(10)  |
| C7E  | 0.047(9)  | 0.031(8)  | 0.038(9)  | 0.006(7)   | 0.010(8)  | 0.022(7)   |
| C3A  | 0.12(2)   | 0.020(8)  | 0.049(12) | 0.024(8)   | 0.021(13) | 0.005(11)  |
| O1B  | 0.089(12) | 0.033(7)  | 0.086(13) | -0.005(8)  | 0.034(10) | 0.022(8)   |
| N2E  | 0.087(15) | 0.081(14) | 0.070(14) | 0.034(11)  | 0.053(12) | 0.051(12)  |
| O4AX | 0.081(12) | 0.056(9)  | 0.061(10) | 0.018(8)   | 0.029(9)  | 0.018(8)   |

## Supplementary Information

|      |           |           |           |            |            |            |
|------|-----------|-----------|-----------|------------|------------|------------|
| C12B | 0.065(13) | 0.024(8)  | 0.032(9)  | -0.012(7)  | -0.002(9)  | 0.005(8)   |
| C9G  | 0.110(11) | 0.109(11) | 0.109(11) | 0.0093(17) | 0.0037(15) | 0.042(4)   |
| C5A  | 0.061(13) | 0.055(12) | 0.018(8)  | -0.005(8)  | 0.007(8)   | -0.011(10) |
| C8A  | 0.076(16) | 0.036(10) | 0.051(13) | -0.007(9)  | 0.001(12)  | -0.006(10) |
| C2D  | 0.043(10) | 0.076(14) | 0.039(10) | 0.008(10)  | -0.007(8)  | 0.035(10)  |
| C9A  | 0.09(2)   | 0.09(2)   | 0.09(2)   | -0.013(18) | -0.034(18) | 0.037(18)  |
| O5AX | 0.133(9)  | 0.133(9)  | 0.134(9)  | 0.012(3)   | 0.005(3)   | 0.052(4)   |
| O7X  | 0.053(11) | 0.119(17) | 0.15(2)   | 0.012(15)  | 0.052(12)  | 0.031(11)  |
| O8X  | 0.068(11) | 0.069(11) | 0.097(15) | 0.000(10)  | 0.009(11)  | 0.025(9)   |
| O5G  | 0.189(14) | 0.189(14) | 0.188(14) | 0.016(3)   | 0.006(3)   | 0.072(6)   |
| O9X  | 0.061(11) | 0.108(16) | 0.100(15) | 0.020(13)  | -0.004(10) | 0.036(11)  |
| O10X | 0.116(8)  | 0.119(8)  | 0.117(8)  | 0.010(3)   | 0.004(3)   | 0.045(4)   |
| O11X | 0.121(9)  | 0.122(9)  | 0.122(9)  | 0.010(3)   | 0.006(3)   | 0.044(4)   |

Table S22. Hydrogen atomic coordinates and isotropic atomic displacement parameters ( $\text{\AA}^2$ ) for compound **5**.

|      | x/a     | y/b     | z/c    | U(eq)    |
|------|---------|---------|--------|----------|
| H02A | 0.4771  | -0.2279 | 0.4053 | 0.039000 |
| H3G1 | 0.6085  | -0.0234 | 0.5691 | 0.074000 |
| H3G2 | 0.6364  | 0.0904  | 0.5914 | 0.074000 |
| H3G3 | 0.5750  | 0.0010  | 0.6256 | 0.074000 |
| H3GA | -0.1037 | -0.0812 | 0.4450 | 0.073000 |
| H2FA | 0.6260  | 0.2016  | 0.6993 | 0.061000 |
| H3CA | 0.7667  | 0.9727  | 0.6406 | 0.087000 |
| H2DA | 0.4889  | 1.4163  | 0.9759 | 0.068000 |
| H3FA | 0.5701  | 0.4082  | 0.7608 | 0.060000 |
| H8FA | 0.4933  | 0.3304  | 0.6497 | 0.035000 |

## Supplementary Information

|      |         |         |        |          |
|------|---------|---------|--------|----------|
| H7FA | 0.6969  | 0.4811  | 0.6988 | 0.031000 |
| H3C1 | 1.3930  | 1.3290  | 0.8881 | 0.072000 |
| H3C2 | 1.4546  | 1.2794  | 0.8523 | 0.072000 |
| H3C3 | 1.4481  | 1.3828  | 0.8389 | 0.072000 |
| H4CA | 1.3889  | 1.2463  | 0.7461 | 0.044000 |
| H7CA | 0.9925  | 1.2476  | 0.7193 | 0.039000 |
| H2CB | 0.8924  | 1.1522  | 0.7947 | 0.082000 |
| H2EA | 0.3305  | -0.3885 | 0.4318 | 0.103000 |
| H4FA | 0.7546  | 0.5661  | 0.5798 | 0.043000 |
| H6FA | 0.7692  | 0.3503  | 0.6763 | 0.036000 |
| H6GA | 0.2121  | 0.0368  | 0.4299 | 0.038000 |
| H5CA | 1.0488  | 1.2374  | 0.5266 | 0.088000 |
| H2GB | 0.1473  | 0.1637  | 0.4375 | 0.073000 |
| H5FA | 0.6681  | 0.2861  | 0.5749 | 0.038000 |
| H2BA | -0.3462 | 0.5684  | 1.0133 | 0.091000 |
| H1D1 | 0.1864  | 1.4495  | 1.2968 | 0.087000 |
| H1D2 | 0.1111  | 1.3397  | 1.2756 | 0.087000 |
| H1D3 | 0.2197  | 1.3563  | 1.2990 | 0.087000 |
| H1A1 | 1.6447  | 1.1801  | 0.0436 | 0.095000 |
| H1A2 | 1.6714  | 1.1071  | 0.0789 | 0.095000 |
| H1A3 | 1.6469  | 1.0766  | 0.0183 | 0.095000 |
| H5FB | 0.5847  | 0.6470  | 0.6557 | 0.082000 |
| H10B | 1.0620  | 1.2607  | 0.6215 | 0.048000 |
| H10C | 1.1356  | 1.1969  | 0.5976 | 0.048000 |
| H3AA | 1.1386  | 0.7287  | 0.2096 | 0.082000 |
| H6EA | 0.6295  | -0.3763 | 0.4650 | 0.044000 |
| H3BB | -0.3584 | 0.3865  | 0.8471 | 0.088000 |

## Supplementary Information

|      |         |         |        |          |
|------|---------|---------|--------|----------|
| H10A | -0.2165 | 0.4179  | 0.9015 | 0.045000 |
| H3F1 | 1.1048  | 0.7213  | 0.5416 | 0.083000 |
| H3F2 | 1.1469  | 0.6588  | 0.5768 | 0.083000 |
| H3F3 | 1.1265  | 0.6277  | 0.5160 | 0.083000 |
| H6AA | 1.2628  | 0.8868  | 0.1881 | 0.050000 |
| H6BA | -0.2838 | 0.4503  | 1.0533 | 0.055000 |
| H7GA | 0.0386  | -0.0443 | 0.3906 | 0.042000 |
| H9FA | 0.4646  | 0.4850  | 0.6214 | 0.052000 |
| H9FB | 0.4758  | 0.4908  | 0.6883 | 0.052000 |
| H4BA | 0.0834  | 0.4055  | 1.0068 | 0.062000 |
| H4GA | 0.3093  | -0.0922 | 0.4645 | 0.046000 |
| H3EB | 0.5661  | -0.4420 | 0.5462 | 0.118000 |
| H5EA | 0.4738  | -0.4299 | 0.4010 | 0.048000 |
| H5GA | 0.1342  | 0.0088  | 0.5438 | 0.037000 |
| H8BA | -0.4268 | 0.3002  | 0.9468 | 0.040000 |
| H3FB | 0.9164  | 0.6923  | 0.5563 | 0.048000 |
| H6CA | 0.9756  | 1.0319  | 0.7526 | 0.044000 |
| H11A | -0.1974 | 0.5694  | 0.9687 | 0.047000 |
| H1CA | 1.2264  | 1.1669  | 0.6964 | 0.045000 |
| H8DA | 0.3059  | 1.4563  | 1.2231 | 0.049000 |
| H8DB | 0.1887  | 1.4384  | 1.1978 | 0.049000 |
| H2EB | 0.8665  | -0.1788 | 0.3348 | 0.064000 |
| H4EB | 0.7534  | -0.1818 | 0.4112 | 0.050000 |
| H8GA | -0.0236 | -0.2143 | 0.4485 | 0.055000 |
| H4AA | 1.2756  | 1.0733  | 0.0705 | 0.080000 |
| H7AA | 1.1610  | 0.9857  | 0.2007 | 0.078000 |
| H3GB | 0.4905  | -0.0356 | 0.4863 | 0.049000 |

## Supplementary Information

|      |         |         |        |          |
|------|---------|---------|--------|----------|
| H3GC | 0.4277  | -0.1293 | 0.5252 | 0.049000 |
| H7DA | 0.2606  | 1.2589  | 1.2086 | 0.058000 |
| H7DB | 0.1458  | 1.2437  | 1.1810 | 0.058000 |
| H6DA | 0.1342  | 1.2378  | 1.0767 | 0.053000 |
| H5BA | -0.0979 | 0.3577  | 0.9820 | 0.051000 |
| H9CA | 0.9508  | 1.0205  | 0.5979 | 0.057000 |
| H8CA | 0.8535  | 1.1491  | 0.6375 | 0.062000 |
| H2B1 | 0.2200  | 0.5095  | 1.0818 | 0.089000 |
| H2B2 | 0.2198  | 0.6182  | 1.0983 | 0.089000 |
| H2B3 | 0.1751  | 0.5302  | 1.1359 | 0.089000 |
| H3DA | 0.5105  | 1.4421  | 1.0734 | 0.062000 |
| H8EA | 0.7110  | -0.2538 | 0.5700 | 0.056000 |
| H8EB | 0.7628  | -0.2103 | 0.5125 | 0.056000 |
| H7EA | 0.5425  | -0.2506 | 0.5391 | 0.044000 |
| H3AB | 1.4558  | 1.1779  | 0.0531 | 0.084000 |
| H1BA | -0.2531 | 0.1522  | 0.8792 | 0.106000 |
| H2E1 | 0.7466  | -0.2660 | 0.1984 | 0.108000 |
| H2E2 | 0.8419  | -0.1730 | 0.2228 | 0.108000 |
| H2E3 | 0.8315  | -0.2849 | 0.2308 | 0.108000 |
| H4AB | 1.0892  | 0.8731  | 0.2634 | 0.102000 |
| H12A | -0.3913 | 0.1448  | 0.9328 | 0.054000 |
| H12B | -0.3971 | 0.1952  | 0.8752 | 0.054000 |
| H9GA | 0.0885  | -0.1935 | 0.3603 | 0.131000 |
| H9GB | 0.1965  | -0.1265 | 0.3984 | 0.131000 |
| H5AA | 1.1681  | 0.7979  | 0.0820 | 0.066000 |
| H8AA | 0.9899  | 0.8281  | 0.1286 | 0.076000 |
| H2DB | 0.4273  | 1.3873  | 1.1599 | 0.059000 |

## Supplementary Information

|      |        |         |        |          |
|------|--------|---------|--------|----------|
| H9AA | 0.9333 | 0.9736  | 0.1629 | 0.110000 |
| H9AB | 1.0344 | 1.0563  | 0.1334 | 0.110000 |
| H5GB | 0.1613 | -0.3074 | 0.3911 | 0.283000 |

---

Table S23. Atomic coordinates and equivalent isotropic atomic displacement parameters ( $\text{\AA}^2$ ) for compound **6**.

U(eq) is defined as one third of the trace of the orthogonalized Uij tensor.

|     | x/a        | y/b         | z/c         | U(eq)       |
|-----|------------|-------------|-------------|-------------|
| W1  | 0.59060(3) | 0.68202(2)  | 0.57493(2)  | 0.01472(10) |
| W2  | 0.58038(3) | 0.58185(2)  | 0.70104(2)  | 0.01559(11) |
| W3  | 0.79069(3) | 0.78759(2)  | 0.60899(2)  | 0.01528(10) |
| W4  | 0.57237(3) | 0.78010(2)  | 0.72923(2)  | 0.01410(10) |
| W5  | 0.78012(3) | 0.58810(2)  | 0.59260(2)  | 0.01617(11) |
| W6  | 0.95020(3) | 0.67333(2)  | 0.90597(2)  | 0.01547(11) |
| W7  | 0.96190(3) | 0.78364(2)  | 0.76698(3)  | 0.01652(11) |
| W8  | 0.74305(3) | 0.77624(2)  | 0.88583(2)  | 0.01396(10) |
| W9  | 0.76920(4) | 0.57688(2)  | 0.87298(2)  | 0.01717(11) |
| W10 | 0.56284(3) | 0.68017(2)  | 0.85634(3)  | 0.01663(11) |
| W11 | 0.96840(4) | 0.58447(2)  | 0.76485(3)  | 0.01839(11) |
| W12 | 0.97808(3) | 0.69479(2)  | 0.62631(3)  | 0.01872(11) |
| Si1 | 0.7709(2)  | 0.68225(11) | 0.74045(16) | 0.01617(11) |
| O5  | 0.8370(6)  | 0.7204(3)   | 0.9218(4)   | 0.0155(15)  |
| O6  | 0.9910(6)  | 0.7264(3)   | 0.8375(4)   | 0.0177(16)  |
| O7  | 0.5461(6)  | 0.7275(3)   | 0.6518(4)   | 0.0184(16)  |
| O9  | 0.6918(5)  | 0.7170(3)   | 0.7867(4)   | 0.0101(14)  |

## Supplementary Information

|      |            |           |           |            |
|------|------------|-----------|-----------|------------|
| C14  | 0.7487(9)  | 0.4320(5) | 0.7378(7) | 0.023(2)   |
| O10  | 0.6853(5)  | 0.8014(3) | 0.6755(4) | 0.0135(14) |
| O11  | 0.6671(6)  | 0.6301(3) | 0.8909(4) | 0.0203(16) |
| O12  | 0.5361(6)  | 0.6335(3) | 0.7697(4) | 0.0183(16) |
| O13  | 0.5199(6)  | 0.6237(3) | 0.6163(4) | 0.0194(16) |
| O14  | 0.8456(6)  | 0.7982(3) | 0.8233(4) | 0.0170(15) |
| O15  | 0.8760(6)  | 0.6452(3) | 0.5834(4) | 0.0192(16) |
| O16  | 0.8694(6)  | 0.6157(3) | 0.9406(4) | 0.0179(16) |
| O17  | 0.0086(6)  | 0.6428(3) | 0.7056(5) | 0.0216(17) |
| O18  | 0.7398(7)  | 0.5272(3) | 0.9336(5) | 0.0283(19) |
| O19  | 0.8857(6)  | 0.5444(3) | 0.8297(4) | 0.0211(16) |
| O20  | 0.6316(6)  | 0.7339(3) | 0.9197(4) | 0.0171(15) |
| O21  | 0.6994(6)  | 0.7327(3) | 0.5659(4) | 0.0213(17) |
| O22  | 0.6693(6)  | 0.5497(3) | 0.6306(4) | 0.0196(16) |
| O23  | 0.4978(6)  | 0.7368(3) | 0.7950(4) | 0.0188(16) |
| O24  | 0.6770(6)  | 0.6300(3) | 0.5297(4) | 0.0207(17) |
| O25  | 0.9051(6)  | 0.7514(3) | 0.5704(4) | 0.0203(16) |
| O10Z | 0.9288(11) | 0.4189(6) | 0.9190(8) | 0.072(4)   |
| O26  | 0.8473(6)  | 0.7220(3) | 0.6997(4) | 0.0158(15) |
| N13  | 0.6055(8)  | 0.4327(4) | 0.6381(6) | 0.028(2)   |
| O27  | 0.8399(6)  | 0.6434(3) | 0.7998(4) | 0.0122(14) |
| O28  | 0.7707(7)  | 0.8380(3) | 0.5439(5) | 0.0243(18) |
| O29  | 0.0276(6)  | 0.6216(3) | 0.8557(4) | 0.0209(16) |
| O30  | 0.8902(7)  | 0.8214(3) | 0.6821(4) | 0.0202(17) |
| O31  | 0.7609(7)  | 0.8202(3) | 0.9606(4) | 0.0209(17) |
| O32  | 0.0406(6)  | 0.7480(3) | 0.6962(5) | 0.0223(17) |
| O33  | 0.7045(6)  | 0.6464(3) | 0.6754(4) | 0.0135(14) |

## Supplementary Information

|      |            |           |           |            |
|------|------------|-----------|-----------|------------|
| O34  | 0.6816(6)  | 0.5609(3) | 0.7825(4) | 0.0199(16) |
| O35  | 0.6394(6)  | 0.8137(3) | 0.8204(4) | 0.0176(16) |
| O36  | 0.5043(7)  | 0.6957(3) | 0.4980(5) | 0.0272(19) |
| O37  | 0.8698(6)  | 0.5683(3) | 0.6801(5) | 0.0227(17) |
| O38  | 0.8152(8)  | 0.5440(4) | 0.5256(5) | 0.033(2)   |
| O11A | 0.9188(7)  | 0.4352(4) | 0.6975(6) | 0.041(2)   |
| O39  | 0.0329(7)  | 0.6829(3) | 0.9871(5) | 0.030(2)   |
| N15  | 0.7584(10) | 0.4329(4) | 0.8174(6) | 0.032(3)   |
| O9Z  | 0.5849(8)  | 0.5586(5) | 0.4213(7) | 0.051(3)   |
| N4   | 0.7528(9)  | 0.7850(5) | 0.3354(6) | 0.036(3)   |
| C12  | 0.6743(9)  | 0.4334(5) | 0.5870(7) | 0.026(3)   |
| O40  | 0.0771(7)  | 0.6836(4) | 0.5711(5) | 0.033(2)   |
| O1   | 0.4800(7)  | 0.8265(3) | 0.7027(5) | 0.0239(18) |
| O2   | 0.4897(7)  | 0.5330(3) | 0.7034(5) | 0.030(2)   |
| O3   | 0.0470(7)  | 0.8314(4) | 0.8010(5) | 0.032(2)   |
| O4   | 0.4662(7)  | 0.6632(4) | 0.9103(5) | 0.030(2)   |
| O5A  | 0.0655(7)  | 0.5399(3) | 0.7543(5) | 0.0292(19) |
| N3   | 0.7797(8)  | 0.7482(5) | 0.2111(6) | 0.027(2)   |
| N12  | 0.7785(9)  | 0.4342(4) | 0.6089(7) | 0.030(2)   |
| N14  | 0.5915(9)  | 0.4348(4) | 0.7765(6) | 0.028(2)   |
| N2   | 0.8024(9)  | 0.8145(5) | 0.1212(6) | 0.032(3)   |
| C13  | 0.6456(10) | 0.4328(4) | 0.7138(8) | 0.027(3)   |
| C15  | 0.8257(9)  | 0.4339(5) | 0.6841(7) | 0.026(3)   |
| O1A  | 0.7849(9)  | 0.9038(4) | 0.1415(6) | 0.048(3)   |
| C3   | 0.7740(10) | 0.8425(6) | 0.2437(7) | 0.032(3)   |
| N5   | 0.7596(9)  | 0.8696(5) | 0.3099(6) | 0.036(3)   |
| N1   | 0.8099(11) | 0.7274(5) | 0.0884(7) | 0.042(3)   |

## Supplementary Information

|      |            |            |            |          |
|------|------------|------------|------------|----------|
| N11  | 0.6426(10) | 0.4353(5)  | 0.5138(7)  | 0.039(3) |
| C11  | 0.6613(11) | 0.4343(5)  | 0.8372(7)  | 0.031(3) |
| C4   | 0.7982(9)  | 0.7627(5)  | 0.1392(6)  | 0.025(3) |
| C5   | 0.7873(10) | 0.8588(6)  | 0.1680(8)  | 0.031(3) |
| C2   | 0.7689(10) | 0.7893(6)  | 0.2603(7)  | 0.032(3) |
| O8Z  | 0.2579(10) | 0.8519(5)  | 0.7576(7)  | 0.055(3) |
| O7Z  | 0.1143(10) | 0.4319(5)  | 0.7895(10) | 0.071(4) |
| O6Z  | 0.0672(10) | 0.4828(6)  | 0.6007(7)  | 0.062(3) |
| O5Z  | 0.7274(9)  | 0.5144(5)  | 0.3363(8)  | 0.057(3) |
| O4Z  | 0.1018(12) | 0.5721(5)  | 0.5118(8)  | 0.067(4) |
| C1   | 0.7485(11) | 0.8350(7)  | 0.3631(8)  | 0.043(4) |
| O3Z  | 0.3882(10) | 0.4384(6)  | 0.7934(9)  | 0.071(4) |
| O2Z  | 0.2725(12) | 0.8080(6)  | 0.9104(8)  | 0.072(4) |
| O1Z  | 0.7839(12) | 0.6166(7)  | 0.0863(9)  | 0.080(4) |
| O11Z | 0.4687(13) | 0.8479(8)  | 0.9113(10) | 0.101(6) |
| O12Z | 0.7905(14) | 0.9697(8)  | 0.3668(10) | 0.097(5) |
| O13Z | 0.0965(18) | 0.5124(10) | 0.9431(13) | 0.135(8) |
| O14Z | 0.446(2)   | 0.5545(11) | 0.0002(16) | 0.155(9) |
| O15Z | 0.565(2)   | 0.6368(11) | 0.0742(16) | 0.156(9) |

---

Table 24. Bond lengths (Å) for compound **6**.

---

|        |          |        |          |
|--------|----------|--------|----------|
| W1-O36 | 1.697(8) | W1-O7  | 1.900(7) |
| W1-O13 | 1.903(8) | W1-O21 | 1.910(8) |
| W1-O24 | 1.935(8) | W1-O33 | 2.354(7) |
| W2-O2  | 1.695(9) | W2-O12 | 1.896(7) |
| W2-O34 | 1.910(8) | W2-O13 | 1.920(8) |
| W2-O22 | 1.946(8) | W2-O33 | 2.350(7) |

## Supplementary Information

|         |          |         |          |
|---------|----------|---------|----------|
| W3-O28  | 1.704(7) | W3-O21  | 1.914(8) |
| W3-O10  | 1.914(7) | W3-O25  | 1.915(8) |
| W3-O30  | 1.918(8) | W3-O26  | 2.351(7) |
| W4-O1   | 1.695(7) | W4-O10  | 1.893(7) |
| W4-O7   | 1.898(7) | W4-O23  | 1.913(8) |
| W4-O35  | 1.933(8) | W4-O9   | 2.358(7) |
| W5-O38  | 1.709(8) | W5-O37  | 1.894(8) |
| W5-O22  | 1.900(8) | W5-O15  | 1.906(8) |
| W5-O24  | 1.947(8) | W5-O33  | 2.343(7) |
| W6-O39  | 1.708(8) | W6-O6   | 1.901(8) |
| W6-O29  | 1.906(8) | W6-O16  | 1.913(8) |
| W6-O5   | 1.918(8) | W6-O27  | 2.351(7) |
| W7-O3   | 1.689(8) | W7-O32  | 1.906(8) |
| W7-O6   | 1.906(7) | W7-O14  | 1.917(8) |
| W7-O30  | 1.920(8) | W7-O26  | 2.366(7) |
| W8-O31  | 1.711(7) | W8-O14  | 1.887(8) |
| W8-O5   | 1.914(7) | W8-O35  | 1.917(7) |
| W8-O20  | 1.929(8) | W8-O9   | 2.331(7) |
| W9-O18  | 1.704(8) | W9-O34  | 1.898(8) |
| W9-O11  | 1.921(8) | W9-O16  | 1.926(7) |
| W9-O19  | 1.933(8) | W9-O27  | 2.344(7) |
| W10-O4  | 1.697(8) | W10-O11 | 1.892(8) |
| W10-O20 | 1.906(7) | W10-O12 | 1.921(7) |
| W10-O23 | 1.921(8) | W10-O9  | 2.353(7) |
| W11-O5A | 1.700(8) | W11-O17 | 1.896(8) |
| W11-O37 | 1.901(8) | W11-O19 | 1.922(8) |
| W11-O29 | 1.936(8) | W11-O27 | 2.347(7) |

## Supplementary Information

|         |           |          |           |
|---------|-----------|----------|-----------|
| W12-O40 | 1.705(9)  | W12-O15  | 1.908(8)  |
| W12-O25 | 1.914(8)  | W12-O17  | 1.916(8)  |
| W12-O32 | 1.930(8)  | W12-O26  | 2.330(8)  |
| Si1-O26 | 1.618(8)  | Si1-O9   | 1.621(7)  |
| Si1-O27 | 1.623(7)  | Si1-O33  | 1.626(7)  |
| C14-C13 | 1.354(17) | C14-N15  | 1.394(16) |
| C14-C15 | 1.440(17) | N13-C12  | 1.328(16) |
| N13-C13 | 1.377(17) | O11A-C15 | 1.201(16) |
| N15-C11 | 1.336(19) | N4-C1    | 1.34(2)   |
| N4-C2   | 1.362(17) | C12-N11  | 1.311(17) |
| C12-N12 | 1.361(16) | N3-C4    | 1.360(16) |
| N3-C21  | .359(18)  | N12-C15  | 1.398(16) |
| N14-C11 | 1.324(17) | N14-C13  | 1.366(17) |
| N2-C4   | 1.335(17) | N2-C5    | 1.404(17) |
| O1A-C5  | 1.218(17) | C3-C2    | 1.36(2)   |
| C3-N5   | 1.376(16) | C3-C5    | 1.420(18) |
| N5-C1   | 1.29(2)   | N1-C4    | 1.276(17) |

Table S25. Bond angles (°) for compound **6**.

|            |          |            |          |
|------------|----------|------------|----------|
| O36-W1-O7  | 103.0(4) | O36-W1-O13 | 99.1(4)  |
| O7-W1-O13  | 89.7(3)  | O36-W1-O21 | 103.2(4) |
| O7-W1-O21  | 86.6(3)  | O13-W1-O21 | 157.7(3) |
| O36-W1-O24 | 99.6(4)  | O7-W1-O24  | 157.4(3) |
| O13-W1-O24 | 87.8(3)  | O21-W1-O24 | 87.2(3)  |
| O36-W1-O33 | 169.4(3) | O7-W1-O33  | 84.5(3)  |
| O13-W1-O33 | 73.2(3)  | O21-W1-O33 | 84.5(3)  |
| O24-W1-O33 | 73.3(3)  | O2-W2-O12  | 102.8(4) |

## Supplementary Information

|            |          |            |          |
|------------|----------|------------|----------|
| O2-W2-O34  | 101.8(4) | O12-W2-O34 | 86.4(3)  |
| O2-W2-O13  | 100.7(4) | O12-W2-O13 | 89.9(3)  |
| O34-W2-O13 | 157.5(3) | O2-W2-O22  | 99.9(4)  |
| O12-W2-O22 | 157.3(3) | O34-W2-O22 | 87.8(3)  |
| O13-W2-O22 | 87.2(3)  | O2-W2-O33  | 170.2(4) |
| O12-W2-O33 | 84.8(3)  | O34-W2-O33 | 84.6(3)  |
| O13-W2-O33 | 73.0(3)  | O22-W2-O33 | 72.7(3)  |
| O28-W3-O21 | 102.7(4) | O28-W3-O10 | 102.1(4) |
| O21-W3-O10 | 85.6(3)  | O28-W3-O25 | 100.4(4) |
| O21-W3-O25 | 89.2(3)  | O10-W3-O25 | 157.5(3) |
| O28-W3-O30 | 99.8(4)  | O21-W3-O30 | 157.5(3) |
| O10-W3-O30 | 88.9(3)  | O25-W3-O30 | 87.6(3)  |
| O28-W3-O26 | 170.6(3) | O21-W3-O26 | 84.5(3)  |
| O10-W3-O26 | 84.4(3)  | O25-W3-O26 | 73.4(3)  |
| O30-W3-O26 | 73.2(3)  | O1-W4-O10  | 103.0(4) |
| O1-W4-O7   | 102.0(4) | O10-W4-O7  | 85.8(3)  |
| O1-W4-O23  | 99.8(4)  | O10-W4-O23 | 157.1(3) |
| O7-W4-O23  | 88.8(3)  | O1-W4-O35  | 100.0(3) |
| O10-W4-O35 | 89.4(3)  | O7-W4-O35  | 158.0(3) |
| O23-W4-O35 | 87.4(3)  | O1-W4-O9   | 170.5(3) |
| O10-W4-O9  | 84.2(3)  | O7-W4-O9   | 84.6(3)  |
| O23-W4-O9  | 73.2(3)  | O35-W4-O9  | 73.6(3)  |
| O38-W5-O37 | 102.0(4) | O38-W5-O22 | 100.3(4) |
| O37-W5-O22 | 90.1(3)  | O38-W5-O15 | 101.8(4) |
| O37-W5-O15 | 85.3(3)  | O22-W5-O15 | 157.9(3) |
| O38-W5-O24 | 99.8(4)  | O37-W5-O24 | 158.0(3) |
| O22-W5-O24 | 88.6(3)  | O15-W5-O24 | 87.7(3)  |

## Supplementary Information

|            |          |            |          |
|------------|----------|------------|----------|
| O38-W5-O33 | 170.7(4) | O37-W5-O33 | 85.2(3)  |
| O22-W5-O33 | 73.7(3)  | O15-W5-O33 | 84.4(3)  |
| O24-W5-O33 | 73.4(3)  | O39-W6-O6  | 103.9(4) |
| O39-W6-O29 | 99.8(4)  | O6-W6-O29  | 89.2(3)  |
| O39-W6-O16 | 98.9(4)  | O6-W6-O16  | 157.2(3) |
| O29-W6-O16 | 88.0(3)  | O39-W6-O5  | 102.3(4) |
| O6-W6-O5   | 85.9(3)  | O29-W6-O5  | 157.9(3) |
| O16-W6-O5  | 88.2(3)  | O39-W6-O27 | 169.5(3) |
| O6-W6-O27  | 84.5(3)  | O29-W6-O27 | 73.7(3)  |
| O16-W6-O27 | 73.0(3)  | O5-W6-O27  | 84.4(3)  |
| O3-W7-O32  | 101.0(4) | O3-W7-O6   | 102.8(4) |
| O32-W7-O6  | 89.5(3)  | O3-W7-O14  | 101.4(4) |
| O32-W7-O14 | 157.6(3) | O6-W7-O14  | 85.4(3)  |
| O3-W7-O30  | 99.9(4)  | O32-W7-O30 | 88.2(4)  |
| O6-W7-O30  | 157.2(3) | O14-W7-O30 | 88.1(3)  |
| O3-W7-O26  | 170.8(4) | O32-W7-O26 | 73.6(3)  |
| O6-W7-O26  | 84.7(3)  | O14-W7-O26 | 84.2(3)  |
| O30-W7-O26 | 72.8(3)  | O31-W8-O14 | 102.3(4) |
| O31-W8-O5  | 100.6(3) | O14-W8-O5  | 86.9(3)  |
| O31-W8-O35 | 100.3(3) | O14-W8-O35 | 89.7(3)  |
| O5-W8-O35  | 159.1(3) | O31-W8-O20 | 99.3(4)  |
| O14-W8-O20 | 158.4(3) | O5-W8-O20  | 88.0(3)  |
| O35-W8-O20 | 87.5(3)  | O31-W8-O9  | 171.2(3) |
| O14-W8-O9  | 84.9(3)  | O5-W8-O9   | 84.6(3)  |
| O35-W8-O9  | 74.6(3)  | O20-W8-O9  | 73.7(3)  |
| O18-W9-O34 | 102.7(4) | O18-W9-O11 | 101.6(4) |
| O34-W9-O11 | 85.6(3)  | O18-W9-O16 | 99.2(4)  |

## Supplementary Information

|             |          |             |          |
|-------------|----------|-------------|----------|
| O34-W9-O16  | 158.1(3) | O11-W9-O16  | 88.8(3)  |
| O18-W9-O19  | 99.9(4)  | O34-W9-O19  | 90.1(3)  |
| O11-W9-O19  | 158.5(3) | O16-W9-O19  | 87.4(3)  |
| O18-W9-O27  | 169.8(4) | O34-W9-O27  | 85.5(3)  |
| O11-W9-O27  | 84.9(3)  | O16-W9-O27  | 73.0(3)  |
| O19-W9-O27  | 73.7(3)  | O4-W10-O11  | 101.2(4) |
| O4-W10-O20  | 100.0(4) | O11-W10-O20 | 90.3(3)  |
| O4-W10-O12  | 102.1(4) | O11-W10-O12 | 85.3(3)  |
| O20-W10-O12 | 157.9(3) | O4-W10-O23  | 101.2(4) |
| O11-W10-O23 | 157.5(3) | O20-W10-O23 | 87.7(3)  |
| O12-W10-O23 | 88.2(3)  | O4-W10-O9   | 171.4(4) |
| O11-W10-O9  | 84.8(3)  | O20-W10-O9  | 73.6(3)  |
| O12-W10-O9  | 84.5(3)  | O23-W10-O9  | 73.2(3)  |
| O5A-W11-O17 | 101.4(4) | O5A-W11-O37 | 102.5(4) |
| O17-W11-O37 | 86.1(3)  | O5A-W11-O19 | 100.6(4) |
| O17-W11-O19 | 158.0(3) | O37-W11-O19 | 89.2(3)  |
| O5A-W11-O29 | 99.9(4)  | O17-W11-O29 | 88.7(3)  |
| O37-W11-O29 | 157.6(3) | O19-W11-O29 | 87.5(3)  |
| O5A-W11-O27 | 171.1(4) | O17-W11-O27 | 84.3(3)  |
| O37-W11-O27 | 84.5(3)  | O19-W11-O27 | 73.8(3)  |
| O29-W11-O27 | 73.3(3)  | O40-W12-O15 | 101.3(4) |
| O40-W12-O25 | 100.8(4) | O15-W12-O25 | 89.6(3)  |
| O40-W12-O17 | 101.1(4) | O15-W12-O17 | 86.0(3)  |
| O25-W12-O17 | 158.1(3) | O40-W12-O32 | 100.7(4) |
| O15-W12-O32 | 157.9(3) | O25-W12-O32 | 88.2(3)  |
| O17-W12-O32 | 87.9(3)  | O40-W12-O26 | 172.4(4) |
| O15-W12-O26 | 84.2(3)  | O25-W12-O26 | 73.9(3)  |

## Supplementary Information

|             |           |             |           |
|-------------|-----------|-------------|-----------|
| O17-W12-O26 | 84.3(3)   | O32-W12-O26 | 74.0(3)   |
| O26-Si1-O9  | 109.6(4)  | O26-Si1-O27 | 109.4(4)  |
| O9-Si1-O27  | 109.3(4)  | O26-Si1-O33 | 109.2(4)  |
| O9-Si1-O33  | 109.5(4)  | O27-Si1-O33 | 109.7(4)  |
| W8-O5-W6    | 150.0(4)  | W6-O6-W7    | 152.5(4)  |
| W4-O7-W1    | 151.6(5)  | Si1-O9-W8   | 124.8(4)  |
| Si1-O9-W10  | 124.5(4)  | W8-O9-W10   | 91.2(2)   |
| Si1-O9-W4   | 124.1(4)  | W8-O9-W4    | 91.1(2)   |
| W10-O9-W4   | 91.1(2)   | C13-C14-N15 | 107.3(11) |
| C13-C14-C15 | 121.2(11) | N15-C14-C15 | 131.3(11) |
| W4-O10-W3   | 152.4(4)  | W10-O11-W9  | 152.0(4)  |
| W2-O12-W10  | 151.3(5)  | W1-O13-W2   | 122.8(4)  |
| W8-O14-W7   | 151.5(4)  | W5-O15-W12  | 151.7(4)  |
| W6-O16-W9   | 122.4(4)  | W11-O17-W12 | 150.9(5)  |
| W11-O19-W9  | 121.1(4)  | W10-O20-W8  | 121.5(4)  |
| W1-O21-W3   | 150.6(5)  | W5-O22-W2   | 122.0(4)  |
| W4-O23-W10  | 122.6(4)  | W1-O24-W5   | 121.2(4)  |
| W12-O25-W3  | 121.6(4)  | Si1-O26-W12 | 125.1(4)  |
| Si1-O26-W3  | 124.6(4)  | W12-O26-W3  | 91.1(3)   |
| Si1-O26-W7  | 123.9(4)  | W12-O26-W7  | 90.9(3)   |
| W3-O26-W7   | 91.2(3)   | C12-N13-C13 | 116.3(11) |
| Si1-O27-W9  | 124.0(4)  | Si1-O27-W11 | 124.3(4)  |
| W9-O27-W11  | 91.4(2)   | Si1-O27-W6  | 124.6(4)  |
| W9-O27-W6   | 91.6(2)   | W11-O27-W6  | 91.2(2)   |
| W6-O29-W11  | 121.8(4)  | W3-O30-W7   | 122.7(4)  |
| W7-O32-W12  | 121.5(4)  | Si1-O33-W5  | 123.8(4)  |
| Si1-O33-W2  | 124.3(4)  | W5-O33-W2   | 91.6(2)   |

## Supplementary Information

|              |           |              |           |
|--------------|-----------|--------------|-----------|
| Si1-O33-W1   | 124.3(4)  | W5-O33-W1    | 92.1(2)   |
| W2-O33-W1    | 91.0(2)   | W9-O34-W2    | 150.9(5)  |
| W8-O35-W4    | 120.8(4)  | W5-O37-W11   | 152.3(5)  |
| C11-N15-C14  | 105.8(11) | C1-N4-C2     | 107.2(13) |
| N11-C12-N13  | 120.2(12) | N11-C12-N12  | 118.5(12) |
| N13-C12-N12  | 121.2(12) | C4-N3-C2     | 115.4(12) |
| C12-N12-C15  | 126.2(11) | C11-N14-C13  | 106.8(11) |
| C4-N2-C5     | 127.9(11) | C14-C13-N14  | 108.5(12) |
| C14-C13-N13  | 124.1(12) | N14-C13-N13  | 127.4(11) |
| O11A-C15-N12 | 121.0(12) | O11A-C15-C14 | 128.1(12) |
| N12-C15-C14  | 110.9(10) | C2-C3-N5     | 106.6(12) |
| C2-C3-C5     | 119.5(13) | N5-C3-C5     | 133.8(14) |
| C1-N5-C3     | 108.5(13) | N14-C11-N15  | 111.6(12) |
| N1-C4-N2     | 119.7(12) | N1-C4-N3     | 120.7(13) |
| N2-C4-N3     | 119.6(11) | O1A-C5-N2    | 120.3(12) |
| O1A-C5-C3    | 128.5(13) | N2-C5-C3     | 111.2(12) |
| N3-C2-N4     | 126.4(14) | N3-C2-C3     | 126.2(12) |
| N4-C2-C3     | 107.4(13) | N5-C1-N4     | 110.3(12) |

Table 26. Bond angles (°) for compound **6**.

|            |          |            |          |
|------------|----------|------------|----------|
| O36-W1-O7  | 103.0(4) | O36-W1-O13 | 99.1(4)  |
| O7-W1-O13  | 89.7(3)  | O36-W1-O21 | 103.2(4) |
| O7-W1-O21  | 86.6(3)  | O13-W1-O21 | 157.7(3) |
| O36-W1-O24 | 99.6(4)  | O7-W1-O24  | 157.4(3) |

## Supplementary Information

|            |          |            |          |
|------------|----------|------------|----------|
| O13-W1-O24 | 87.8(3)  | O21-W1-O24 | 87.2(3)  |
| O36-W1-O33 | 169.4(3) | O7-W1-O33  | 84.5(3)  |
| O13-W1-O33 | 73.2(3)  | O21-W1-O33 | 84.5(3)  |
| O24-W1-O33 | 73.3(3)  | O2-W2-O12  | 102.8(4) |
| O2-W2-O34  | 101.8(4) | O12-W2-O34 | 86.4(3)  |
| O2-W2-O13  | 100.7(4) | O12-W2-O13 | 89.9(3)  |
| O34-W2-O13 | 157.5(3) | O2-W2-O22  | 99.9(4)  |
| O12-W2-O22 | 157.3(3) | O34-W2-O22 | 87.8(3)  |
| O13-W2-O22 | 87.2(3)  | O2-W2-O33  | 170.2(4) |
| O12-W2-O33 | 84.8(3)  | O34-W2-O33 | 84.6(3)  |
| O13-W2-O33 | 73.0(3)  | O22-W2-O33 | 72.7(3)  |
| O28-W3-O21 | 102.7(4) | O28-W3-O10 | 102.1(4) |
| O21-W3-O10 | 85.6(3)  | O28-W3-O25 | 100.4(4) |
| O21-W3-O25 | 89.2(3)  | O10-W3-O25 | 157.5(3) |
| O28-W3-O30 | 99.8(4)  | O21-W3-O30 | 157.5(3) |
| O10-W3-O30 | 88.9(3)  | O25-W3-O30 | 87.6(3)  |
| O28-W3-O26 | 170.6(3) | O21-W3-O26 | 84.5(3)  |
| O10-W3-O26 | 84.4(3)  | O25-W3-O26 | 73.4(3)  |
| O30-W3-O26 | 73.2(3)  | O1-W4-O10  | 103.0(4) |
| O1-W4-O7   | 102.0(4) | O10-W4-O7  | 85.8(3)  |
| O1-W4-O23  | 99.8(4)  | O10-W4-O23 | 157.1(3) |
| O7-W4-O23  | 88.8(3)  | O1-W4-O35  | 100.0(3) |
| O10-W4-O35 | 89.4(3)  | O7-W4-O35  | 158.0(3) |
| O23-W4-O35 | 87.4(3)  | O1-W4-O9   | 170.5(3) |
| O10-W4-O9  | 84.2(3)  | O7-W4-O9   | 84.6(3)  |
| O23-W4-O9  | 73.2(3)  | O35-W4-O9  | 73.6(3)  |
| O38-W5-O37 | 102.0(4) | O38-W5-O22 | 100.3(4) |

## Supplementary Information

|            |          |            |          |
|------------|----------|------------|----------|
| O37-W5-O22 | 90.1(3)  | O38-W5-O15 | 101.8(4) |
| O37-W5-O15 | 85.3(3)  | O22-W5-O15 | 157.9(3) |
| O38-W5-O24 | 99.8(4)  | O37-W5-O24 | 158.0(3) |
| O22-W5-O24 | 88.6(3)  | O15-W5-O24 | 87.7(3)  |
| O38-W5-O33 | 170.7(4) | O37-W5-O33 | 85.2(3)  |
| O22-W5-O33 | 73.7(3)  | O15-W5-O33 | 84.4(3)  |
| O24-W5-O33 | 73.4(3)  | O39-W6-O6  | 103.9(4) |
| O39-W6-O29 | 99.8(4)  | O6-W6-O29  | 89.2(3)  |
| O39-W6-O16 | 98.9(4)  | O6-W6-O16  | 157.2(3) |
| O29-W6-O16 | 88.0(3)  | O39-W6-O5  | 102.3(4) |
| O6-W6-O5   | 85.9(3)  | O29-W6-O5  | 157.9(3) |
| O16-W6-O5  | 88.2(3)  | O39-W6-O27 | 169.5(3) |
| O6-W6-O27  | 84.5(3)  | O29-W6-O27 | 73.7(3)  |
| O16-W6-O27 | 73.0(3)  | O5-W6-O27  | 84.4(3)  |
| O3-W7-O32  | 101.0(4) | O3-W7-O6   | 102.8(4) |
| O32-W7-O6  | 89.5(3)  | O3-W7-O14  | 101.4(4) |
| O32-W7-O14 | 157.6(3) | O6-W7-O14  | 85.4(3)  |
| O3-W7-O30  | 99.9(4)  | O32-W7-O30 | 88.2(4)  |
| O6-W7-O30  | 157.2(3) | O14-W7-O30 | 88.1(3)  |
| O3-W7-O26  | 170.8(4) | O32-W7-O26 | 73.6(3)  |
| O6-W7-O26  | 84.7(3)  | O14-W7-O26 | 84.2(3)  |
| O30-W7-O26 | 72.8(3)  | O31-W8-O14 | 102.3(4) |
| O31-W8-O5  | 100.6(3) | O14-W8-O5  | 86.9(3)  |
| O31-W8-O35 | 100.3(3) | O14-W8-O35 | 89.7(3)  |
| O5-W8-O35  | 159.1(3) | O31-W8-O20 | 99.3(4)  |
| O14-W8-O20 | 158.4(3) | O5-W8-O20  | 88.0(3)  |
| O35-W8-O20 | 87.5(3)  | O31-W8-O9  | 171.2(3) |

## Supplementary Information

|             |          |             |          |
|-------------|----------|-------------|----------|
| O14-W8-O9   | 84.9(3)  | O5-W8-O9    | 84.6(3)  |
| O35-W8-O9   | 74.6(3)  | O20-W8-O9   | 73.7(3)  |
| O18-W9-O34  | 102.7(4) | O18-W9-O11  | 101.6(4) |
| O34-W9-O11  | 85.6(3)  | O18-W9-O16  | 99.2(4)  |
| O34-W9-O16  | 158.1(3) | O11-W9-O16  | 88.8(3)  |
| O18-W9-O19  | 99.9(4)  | O34-W9-O19  | 90.1(3)  |
| O11-W9-O19  | 158.5(3) | O16-W9-O19  | 87.4(3)  |
| O18-W9-O27  | 169.8(4) | O34-W9-O27  | 85.5(3)  |
| O11-W9-O27  | 84.9(3)  | O16-W9-O27  | 73.0(3)  |
| O19-W9-O27  | 73.7(3)  | O4-W10-O11  | 101.2(4) |
| O4-W10-O20  | 100.0(4) | O11-W10-O20 | 90.3(3)  |
| O4-W10-O12  | 102.1(4) | O11-W10-O12 | 85.3(3)  |
| O20-W10-O12 | 157.9(3) | O4-W10-O23  | 101.2(4) |
| O11-W10-O23 | 157.5(3) | O20-W10-O23 | 87.7(3)  |
| O12-W10-O23 | 88.2(3)  | O4-W10-O9   | 171.4(4) |
| O11-W10-O9  | 84.8(3)  | O20-W10-O9  | 73.6(3)  |
| O12-W10-O9  | 84.5(3)  | O23-W10-O9  | 73.2(3)  |
| O5A-W11-O17 | 101.4(4) | O5A-W11-O37 | 102.5(4) |
| O17-W11-O37 | 86.1(3)  | O5A-W11-O19 | 100.6(4) |
| O17-W11-O19 | 158.0(3) | O37-W11-O19 | 89.2(3)  |
| O5A-W11-O29 | 99.9(4)  | O17-W11-O29 | 88.7(3)  |
| O37-W11-O29 | 157.6(3) | O19-W11-O29 | 87.5(3)  |
| O5A-W11-O27 | 171.1(4) | O17-W11-O27 | 84.3(3)  |
| O37-W11-O27 | 84.5(3)  | O19-W11-O27 | 73.8(3)  |
| O29-W11-O27 | 73.3(3)  | O40-W12-O15 | 101.3(4) |
| O40-W12-O25 | 100.8(4) | O15-W12-O25 | 89.6(3)  |
| O40-W12-O17 | 101.1(4) | O15-W12-O17 | 86.0(3)  |

## Supplementary Information

|             |            |             |            |
|-------------|------------|-------------|------------|
| O25-W12-O17 | 158.1(3)   | O40-W12-O32 | 100.7(4)   |
| O15-W12-O32 | 157.9(3)   | O25-W12-O32 | 88.2(3)    |
| O17-W12-O32 | 87.9(3)    | O40-W12-O26 | 172.4(4)   |
| O15-W12-O26 | 84.2(3)    | O25-W12-O26 | 73.9(3)    |
| O17-W12-O26 | 84.3(3)    | O32-W12-O26 | 74.0(3)    |
| O26-Si1-O9  | 109.6(4)   | O26-Si1-O27 | 109.4(4)   |
| O9-Si1-O27  | 109.3(4)   | O26-Si1-O33 | 109.2(4)   |
| O9-Si1-O33  | 109.5(4)   | O27-Si1-O33 | 109.7(4)   |
| W8-O5-W6    | 150.0(4)   | W6-O6-W7    | 152.5(4)   |
| W4-O7-W1    | 151.6(5)   | Si1-O9-W8   | 124.8(4)   |
| Si1-O9-W10  | 124.5(4)   | W8-O9-W10   | 91.2(2)    |
| Si1-O9-W4   | 124.1(4)   | W8-O9-W4    | 91.1(2)    |
| W10-O9-W4   | 91.1(2)    | C13-C14-N15 | 107.3(11)  |
| C13-C14-C15 | 1 21.2(11) | N15-C14-C15 | 1 31.3(11) |
| W4-O10-W3   | 152.4(4)   | W10-O11-W9  | 152.0(4)   |
| W2-O12-W10  | 151.3(5)   | W1-O13-W2   | 122.8(4)   |
| W8-O14-W7   | 151.5(4)   | W5-O15-W12  | 151.7(4)   |
| W6-O16-W9   | 122.4(4)   | W11-O17-W12 | 150.9(5)   |
| W11-O19-W9  | 121.1(4)   | W10-O20-W8  | 121.5(4)   |
| W1-O21-W3   | 150.6(5)   | W5-O22-W2   | 122.0(4)   |
| W4-O23-W10  | 122.6(4)   | W1-O24-W5   | 121.2(4)   |
| W12-O25-W3  | 121.6(4)   | Si1-O26-W12 | 125.1(4)   |
| Si1-O26-W3  | 124.6(4)   | W12-O26-W3  | 91.1(3)    |
| Si1-O26-W7  | 123.9(4)   | W12-O26-W7  | 90.9(3)    |
| W3-O26-W7   | 91.2(3)    | C12-N13-C13 | 1 16.3(11) |
| Si1-O27-W9  | 124.0(4)   | Si1-O27-W11 | 124.3(4)   |
| W9-O27-W11  | 91.4(2)    | Si1-O27-W6  | 124.6(4)   |

## Supplementary Information

|              |           |              |           |
|--------------|-----------|--------------|-----------|
| W9-O27-W6    | 91.6(2)   | W11-O27-W6   | 91.2(2)   |
| W6-O29-W11   | 121.8(4)  | W3-O30-W7    | 122.7(4)  |
| W7-O32-W12   | 121.5(4)  | Si1-O33-W5   | 123.8(4)  |
| Si1-O33-W2   | 124.3(4)  | W5-O33-W2    | 91.6(2)   |
| Si1-O33-W1   | 124.3(4)  | W5-O33-W1    | 92.1(2)   |
| W2-O33-W1    | 91.0(2)   | W9-O34-W2    | 150.9(5)  |
| W8-O35-W4    | 120.8(4)  | W5-O37-W11   | 152.3(5)  |
| C11-N15-C14  | 105.8(11) | C1-N4-C2     | 107.2(13) |
| N11-C12-N13  | 120.2(12) | N11-C12-N12  | 118.5(12) |
| N13-C12-N12  | 121.2(12) | C4-N3-C2     | 115.4(12) |
| C12-N12-C15  | 126.2(11) | C11-N14-C13  | 106.8(11) |
| C4-N2-C5     | 127.9(11) | C14-C13-N14  | 108.5(12) |
| C14-C13-N13  | 124.1(12) | N14-C13-N13  | 127.4(11) |
| O11A-C15-N12 | 121.0(12) | O11A-C15-C14 | 128.1(12) |
| N12-C15-C14  | 110.9(10) | C2-C3-N5     | 106.6(12) |
| C2-C3-C5     | 119.5(13) | N5-C3-C5     | 133.8(14) |
| C1-N5-C3     | 108.5(13) | N14-C11-N15  | 111.6(12) |
| N1-C4-N2     | 119.7(12) | N1-C4-N3     | 120.7(13) |
| N2-C4-N3     | 119.6(11) | O1A-C5-N2    | 120.3(12) |
| O1A-C5-C3    | 128.5(13) | N2-C5-C3     | 111.2(12) |
| N3-C2-N4     | 126.4(14) | N3-C2-C3     | 126.2(12) |
| N4-C2-C3     | 107.4(13) | N5-C1-N4     | 110.3(12) |

Table 28. Hydrogen atomic coordinates and isotropic atomic displacement parameters ( $\text{\AA}^2$ ) for compound **6**.

|     | <i>x/a</i> | <i>y/b</i> | <i>z/c</i> | <i>U</i> (eq) |
|-----|------------|------------|------------|---------------|
| H4A | 0.7465     | 0.7558     | 1.3603     | 0.043000      |

## Supplementary Information

|      |        |        |        |          |
|------|--------|--------|--------|----------|
| H12A | 0.8192 | 0.4351 | 0.5731 | 0.036000 |
| H14A | 0.5249 | 0.4360 | 0.7766 | 0.034000 |
| H2A  | 0.8160 | 0.8216 | 1.0754 | 0.038000 |
| H1A  | 0.8052 | 0.6949 | 1.1087 | 0.063000 |
| H1B  | 0.7604 | 0.7313 | 1.0497 | 0.063000 |
| H1C  | 0.8721 | 0.7312 | 1.0715 | 0.063000 |
| H11A | 0.6975 | 0.4355 | 0.4871 | 0.058000 |
| H11B | 0.6034 | 0.4067 | 0.5009 | 0.058000 |
| H11C | 0.6053 | 0.4648 | 0.5037 | 0.058000 |
| H11Z | 0.6447 | 0.4349 | 0.8875 | 0.037000 |
| H1Z  | 0.7389 | 0.8435 | 1.4134 | 0.051000 |

---
